# Supplementary material for: Cancer-specific CTCF binding facilitates oncogenic transcriptional dysregulation
Source: PubMed Central journal article supplement (PMC7493976; doi:10.1186/s13059-020-02152-7), 2020-09-15
Supplement: 13059_2020_2152_MOESM7_ESM.pdf [file 13059_2020_2152_MOESM7_ESM.pdf]

**Table S6. De novo motif analysis results on cancer-specific lost and gained CTCF binding sites in six cancer types, using HOMER and MEME.**

**HOMER Results**

Top 10 motifs with p-value  $\leq 1e-12$  were shown for each dataset. N.A., no motifs were reported.

**T-ALL lost CTCF binding sites**

| Rank | Motif | P-value | log P-pvalue | % of Targets | % of Background | STD(Bg STD)       | Best Match/Details                                                                                                                      |
|------|-------|---------|--------------|--------------|-----------------|-------------------|-----------------------------------------------------------------------------------------------------------------------------------------|
| 1    |       | 1e-20   | -4.623e+01   | 43.52%       | 5.62%           | 177.9bp (157.3bp) | 5-TGCCACCT(0.779)<br><a href="#">More Information</a>   <a href="#">Similar Motifs Found</a>                                            |
| 2    |       | 1e-19   | -4.554e+01   | 65.74%       | 18.88%          | 166.8bp (203.3bp) | SeqBias: GCW-triplet(0.841)<br><a href="#">More Information</a>   <a href="#">Similar Motifs Found</a>                                  |
| 3    |       | 1e-16   | -3.704e+01   | 36.11%       | 4.70%           | 197.9bp (180.3bp) | ZNF143(STAF(Zf)/CUTLL-ZNF143-ChIP-Seq(GSE29600)/Homer(0.733)<br><a href="#">More Information</a>   <a href="#">Similar Motifs Found</a> |
| 4    |       | 1e-15   | -3.474e+01   | 63.89%       | 22.70%          | 175.4bp (208.6bp) | 5-CAGAGCTC(0.778)<br><a href="#">More Information</a>   <a href="#">Similar Motifs Found</a>                                            |
| 5    |       | 1e-13   | -3.092e+01   | 49.07%       | 13.79%          | 155.5bp (202.5bp) | Sp1(Zf)/Promoter/Homer(0.679)<br><a href="#">More Information</a>   <a href="#">Similar Motifs Found</a>                                |
| 6    |       | 1e-12   | -2.986e+01   | 39.81%       | 8.72%           | 125.9bp (208.3bp) | 24-GGCTCCCA(0.730)<br><a href="#">More Information</a>   <a href="#">Similar Motifs Found</a>                                           |
| 7    |       | 1e-12   | -2.911e+01   | 29.63%       | 4.14%           | 215.2bp (175.6bp) | REM19(REM)/colamp-REM19-DAP-Seq(GSE60143)/Homer(0.941)<br><a href="#">More Information</a>   <a href="#">Similar Motifs Found</a>       |

**T-ALL gained CTCF binding sites**

| Rank | Motif | P-value | log P-pvalue | % of Targets | % of Background | STD(Bg STD)       | Best Match/Details                                                                                                               |
|------|-------|---------|--------------|--------------|-----------------|-------------------|----------------------------------------------------------------------------------------------------------------------------------|
| 1    |       | 1e-21   | -4.946e+01   | 61.11%       | 7.11%           | 92.0bp (94.0bp)   | 8-TTCCTCCC(0.695)<br><a href="#">More Information</a>   <a href="#">Similar Motifs Found</a>                                     |
| 2    |       | 1e-17   | -3.917e+01   | 47.22%       | 4.62%           | 109.9bp (142.0bp) | MafA(bZIP)/Islet-MafA-ChIP-Seq(GSE30298)/Homer(0.642)<br><a href="#">More Information</a>   <a href="#">Similar Motifs Found</a> |
| 3    |       | 1e-16   | -3.773e+01   | 48.61%       | 5.51%           | 74.4bp (88.6bp)   | TCP1(TCP)/col-TCP1-DAP-Seq(GSE60143)/Homer(0.654)<br><a href="#">More Information</a>   <a href="#">Similar Motifs Found</a>     |
| 4    |       | 1e-15   | -3.456e+01   | 38.89%       | 2.75%           | 122.8bp (72.2bp)  | 24-GCCCTGCCCT(0.691)<br><a href="#">More Information</a>   <a href="#">Similar Motifs Found</a>                                  |

**AML lost CTCF binding sites**

| Rank | Motif | P-value | log P-pvalue | % of Targets | % of Background | STD(Bg STD)       | Best Match/Details                                                                             |
|------|-------|---------|--------------|--------------|-----------------|-------------------|------------------------------------------------------------------------------------------------|
| 1    |       | 1e-13   | -3.053e+01   | 65.31%       | 11.59%          | 160.3bp (218.1bp) | 24-CCCCTTCTC(0.873)<br><a href="#">More Information</a>   <a href="#">Similar Motifs Found</a> |
| 2    |       | 1e-13   | -3.052e+01   | 44.90%       | 2.64%           | 104.3bp (184.1bp) | 1-CCACYAGRGG(0.853)<br><a href="#">More Information</a>   <a href="#">Similar Motifs Found</a> |

**AML gained CTCF binding sites**

| Rank | Motif | P-value | log P-pvalue | % of Targets | % of Background | STD(Bg STD)       | Best Match/Details                                                                                                                               |
|------|-------|---------|--------------|--------------|-----------------|-------------------|--------------------------------------------------------------------------------------------------------------------------------------------------|
| 1    |       | 1e-208  | -4.811e+02   | 53.70%       | 13.63%          | 87.5bp (134.9bp)  | 3-TGGCGCCA(0.688)<br><a href="#">More Information</a>   <a href="#">Similar Motifs Found</a>                                                     |
| 2    |       | 1e-191  | -4.418e+02   | 60.33%       | 19.61%          | 95.9bp (143.3bp)  | PU.1(ETS)/ThioMac-PU.1-ChIP-Seq(GSE21512)/Homer(0.744)<br><a href="#">More Information</a>   <a href="#">Similar Motifs Found</a>                |
| 3    |       | 1e-143  | -3.303e+02   | 85.07%       | 49.74%          | 99.4bp (137.2bp)  | 2-CCMCCWGGGGC(0.777)<br><a href="#">More Information</a>   <a href="#">Similar Motifs Found</a>                                                  |
| 4    |       | 1e-111  | -2.561e+02   | 61.30%       | 29.10%          | 107.9bp (155.7bp) | bZIP18(bZIP)/colamp-bZIP18-DAP-Seq(GSE60143)/Homer(0.625)<br><a href="#">More Information</a>   <a href="#">Similar Motifs Found</a>             |
| 5    |       | 1e-105  | -2.433e+02   | 32.00%       | 8.28%           | 108.7bp (117.7bp) | 12-CGCCCGCMG(0.645)<br><a href="#">More Information</a>   <a href="#">Similar Motifs Found</a>                                                   |
| 6    |       | 1e-98   | -2.276e+02   | 69.80%       | 39.03%          | 102.1bp (134.5bp) | EBF1(EBF)/Near-E2A-ChIP-Seq(GSE21512)/Homer(0.621)<br><a href="#">More Information</a>   <a href="#">Similar Motifs Found</a>                    |
| 7    |       | 1e-92   | -2.120e+02   | 38.91%       | 13.86%          | 104.6bp (131.1bp) | 10-AGTTCCCCTTCC(0.711)<br><a href="#">More Information</a>   <a href="#">Similar Motifs Found</a>                                                |
| 8    |       | 1e-91   | -2.109e+02   | 35.11%       | 11.40%          | 101.5bp (136.2bp) | EWS:ERG-fusion(ETS)/CADO_ES1-EWS:ERG-ChIP-Seq(SRA014231)/Homer(0.837)<br><a href="#">More Information</a>   <a href="#">Similar Motifs Found</a> |
| 9    |       | 1e-86   | -1.986e+02   | 49.34%       | 22.37%          | 104.6bp (141.5bp) | ZNF416(Zf)/HEK293-ZNF416.GFP-ChIP-Seq(GSE58341)/Homer(0.816)<br><a href="#">More Information</a>   <a href="#">Similar Motifs Found</a>          |
| 10   |       | 1e-80   | -1.849e+02   | 51.21%       | 24.75%          | 105.1bp (124.3bp) | SeqBias: CA-repeat(0.792)<br><a href="#">More Information</a>   <a href="#">Similar Motifs Found</a>                                             |

## BRCA lost CTCF binding sites

N.A.

## BRCA gained CTCF binding sites

| Rank | Motif | P-value | log P-pvalue | % of Targets | % of Background | STD(Bg STD)       | Best Match/Details                                                                                                                      |
|------|-------|---------|--------------|--------------|-----------------|-------------------|-----------------------------------------------------------------------------------------------------------------------------------------|
| 1    |       | 1e-333  | -7.689e+02   | 71.81%       | 22.12%          | 149.3bp (231.2bp) | 2-CCMCCWGGGGGC(0.827)<br><a href="#">More Information</a>   <a href="#">Similar Motifs Found</a>                                        |
| 2    |       | 1e-255  | -5.890e+02   | 75.86%       | 31.49%          | 140.3bp (195.3bp) | 5-TGCCACCT(0.742)<br><a href="#">More Information</a>   <a href="#">Similar Motifs Found</a>                                            |
| 3    |       | 1e-236  | -5.450e+02   | 63.82%       | 22.26%          | 160.6bp (194.6bp) | ZNF416(Zf)/HEK293-ZNF416.GFP-ChIP-Seq(GSE58341)/Homer(0.699)<br><a href="#">More Information</a>   <a href="#">Similar Motifs Found</a> |
| 4    |       | 1e-206  | -4.753e+02   | 73.38%       | 33.40%          | 144.3bp (189.0bp) | ZNF322(Zf)/HEK293-ZNF322.GFP-ChIP-Seq(GSE58341)/Homer(0.679)<br><a href="#">More Information</a>   <a href="#">Similar Motifs Found</a> |
| 5    |       | 1e-195  | -4.500e+02   | 66.97%       | 28.35%          | 157.5bp (192.4bp) | ZNF416(Zf)/HEK293-ZNF416.GFP-ChIP-Seq(GSE58341)/Homer(0.694)<br><a href="#">More Information</a>   <a href="#">Similar Motifs Found</a> |
| 6    |       | 1e-171  | -3.945e+02   | 58.58%       | 23.35%          | 164.2bp (177.0bp) | 6-GCTCCAGGCCGG(0.687)<br><a href="#">More Information</a>   <a href="#">Similar Motifs Found</a>                                        |
| 7    |       | 1e-162  | -3.734e+02   | 57.68%       | 23.45%          | 157.9bp (175.7bp) | TEAD3(TEA)/HepG2-TEAD3-ChIP-Seq(Encode)/Homer(0.660)<br><a href="#">More Information</a>   <a href="#">Similar Motifs Found</a>         |
| 8    |       | 1e-141  | -3.269e+02   | 79.18%       | 46.59%          | 149.7bp (192.0bp) | 10-CCACAGTG(0.718)<br><a href="#">More Information</a>   <a href="#">Similar Motifs Found</a>                                           |
| 9    |       | 1e-141  | -3.262e+02   | 58.86%       | 26.43%          | 156.6bp (188.9bp) | 24-GGCTCCCA(0.742)<br><a href="#">More Information</a>   <a href="#">Similar Motifs Found</a>                                           |
| 10   |       | 1e-136  | -3.139e+02   | 58.81%       | 26.94%          | 181.6bp (197.3bp) | FRS9(ND)/col-FRS9-DAP-Seq(GSE60143)/Homer(0.822)<br><a href="#">More Information</a>   <a href="#">Similar Motifs Found</a>             |

## CRC lost CTCF binding sites

N.A.

## CRC gained CTCF binding sites

| Rank | Motif | P-value | log P-pvalue | % of Targets | % of Background | STD(Bg STD)       | Best Match/Details                                                                                                                               |
|------|-------|---------|--------------|--------------|-----------------|-------------------|--------------------------------------------------------------------------------------------------------------------------------------------------|
| 1    |       | 1e-80   | -1.853e+02   | 82.08%       | 29.52%          | 98.7bp (204.9bp)  | 2-CCMCCWGGGGGC(0.933)<br><a href="#">More Information</a>   <a href="#">Similar Motifs Found</a>                                                 |
| 2    |       | 1e-54   | -1.253e+02   | 72.99%       | 29.54%          | 109.8bp (177.7bp) | Erra(NR)/HepG2-Erra-ChIP-Seq(GSE31477)/Homer(0.790)<br><a href="#">More Information</a>   <a href="#">Similar Motifs Found</a>                   |
| 3    |       | 1e-53   | -1.222e+02   | 42.86%       | 8.30%           | 116.7bp (214.3bp) | 6-GCTCCAGGCCGG(0.707)<br><a href="#">More Information</a>   <a href="#">Similar Motifs Found</a>                                                 |
| 4    |       | 1e-45   | -1.056e+02   | 84.16%       | 45.27%          | 128.9bp (180.3bp) | Six2(Homeobox)/NephronProgenitor-Six2-ChIP-Seq(GSE39837)/Homer(0.588)<br><a href="#">More Information</a>   <a href="#">Similar Motifs Found</a> |
| 5    |       | 1e-44   | -1.015e+02   | 59.22%       | 21.60%          | 137.1bp (192.0bp) | 24-CCCCTCCTC(0.765)<br><a href="#">More Information</a>   <a href="#">Similar Motifs Found</a>                                                   |
| 6    |       | 1e-39   | -9.006e+01   | 41.04%       | 10.67%          | 103.8bp (161.9bp) | TEAD3(TEA)/HepG2-TEAD3-ChIP-Seq(Encode)/Homer(0.679)<br><a href="#">More Information</a>   <a href="#">Similar Motifs Found</a>                  |
| 7    |       | 1e-33   | -7.823e+01   | 72.99%       | 38.65%          | 124.2bp (176.4bp) | ERF15(AP2EREBP)/colamp-ERF15-DAP-Seq(GSE60143)/Homer(0.699)<br><a href="#">More Information</a>   <a href="#">Similar Motifs Found</a>           |
| 8    |       | 1e-33   | -7.744e+01   | 57.66%       | 24.58%          | 110.6bp (169.4bp) | 5-TGCCACCT(0.788)<br><a href="#">More Information</a>   <a href="#">Similar Motifs Found</a>                                                     |
| 9    |       | 1e-32   | -7.533e+01   | 48.31%       | 17.68%          | 102.3bp (154.0bp) | ZNF416(Zf)/HEK293-ZNF416.GFP-ChIP-Seq(GSE58341)/Homer(0.691)<br><a href="#">More Information</a>   <a href="#">Similar Motifs Found</a>          |
| 10   |       | 1e-32   | -7.452e+01   | 55.32%       | 23.21%          | 147.7bp (162.3bp) | MyoD(bHLH)/Myotube-MyoD-ChIP-Seq(GSE21614)/Homer(0.861)<br><a href="#">More Information</a>   <a href="#">Similar Motifs Found</a>               |

## LUAD lost CTCF binding sites

| Rank | Motif | P-value | log P-pvalue | % of Targets | % of Background | STD(Bg STD)       | Best Match/Details                                                                                                                          |
|------|-------|---------|--------------|--------------|-----------------|-------------------|---------------------------------------------------------------------------------------------------------------------------------------------|
| 1    |       | 1e-17   | -3.941e+01   | 80.77%       | 27.20%          | 251.4bp (311.2bp) | 5-CAGAGCTC(0.748)<br><a href="#">More Information</a>   <a href="#">Similar Motifs Found</a>                                                |
| 2    |       | 1e-14   | -3.344e+01   | 57.69%       | 12.87%          | 203.5bp (265.8bp) | AT3G57600(AP2EREBP)/col-AT3G57600-DAP-Seq(GSE60143)/Homer(0.753)<br><a href="#">More Information</a>   <a href="#">Similar Motifs Found</a> |
| 3    |       | 1e-14   | -3.344e+01   | 48.72%       | 7.95%           | 240.4bp (601.6bp) | 5-ATCTCCAGGA(0.759)<br><a href="#">More Information</a>   <a href="#">Similar Motifs Found</a>                                              |
| 4    |       | 1e-14   | -3.340e+01   | 51.28%       | 9.26%           | 198.9bp (277.3bp) | 5-TGCCACCT(0.865)<br><a href="#">More Information</a>   <a href="#">Similar Motifs Found</a>                                                |
| 5    |       | 1e-14   | -3.284e+01   | 37.18%       | 3.06%           | 319.6bp (113.3bp) | SeqBias: GCW-triplet(0.837)<br><a href="#">More Information</a>   <a href="#">Similar Motifs Found</a>                                      |
| 6    |       | 1e-12   | -2.916e+01   | 57.69%       | 15.38%          | 223.6bp (184.0bp) | EHF(ETS)/LoVo-EHF-ChIP-Seq(GSE49402)/Homer(0.795)<br><a href="#">More Information</a>   <a href="#">Similar Motifs Found</a>                |

## LUAD gained CTCF binding sites

| Rank | Motif | P-value | log P-pvalue | % of Targets | % of Background | STD(Bg STD)       | Best Match/Details                                                                                                                        |
|------|-------|---------|--------------|--------------|-----------------|-------------------|-------------------------------------------------------------------------------------------------------------------------------------------|
| 1    |       | 1e-45   | -1.038e+02   | 33.70%       | 4.91%           | 93.1bp (174.1bp)  | 7-TACTGCCCCCTA(0.833)<br><a href="#">More Information</a>   <a href="#">Similar Motifs Found</a>                                          |
| 2    |       | 1e-41   | -9.647e+01   | 73.26%       | 33.73%          | 150.0bp (196.3bp) | SeqBias: G/A bias(0.876)<br><a href="#">More Information</a>   <a href="#">Similar Motifs Found</a>                                       |
| 3    |       | 1e-40   | -9.418e+01   | 53.76%       | 17.66%          | 134.6bp (223.4bp) | NF1-halfsite(CTF)/LNCaP-NF1-ChIP-Seq(Unpublished)/Homer(0.699)<br><a href="#">More Information</a>   <a href="#">Similar Motifs Found</a> |
| 4    |       | 1e-37   | -8.585e+01   | 57.66%       | 21.99%          | 154.0bp (182.9bp) | 14-CTKCTGGC(0.804)<br><a href="#">More Information</a>   <a href="#">Similar Motifs Found</a>                                             |
| 5    |       | 1e-32   | -7.537e+01   | 46.80%       | 15.75%          | 158.4bp (186.8bp) | ZNF416(Zf)/HEK293-ZNF416.GFP-ChIP-Seq(GSE58341)/Homer(0.687)<br><a href="#">More Information</a>   <a href="#">Similar Motifs Found</a>   |
| 6    |       | 1e-26   | -6.080e+01   | 34.54%       | 10.10%          | 121.1bp (183.5bp) | RUNX-AML(Runt)/CD4+PolII-ChIP-Seq(Barski_et_al.)/Homer(0.628)<br><a href="#">More Information</a>   <a href="#">Similar Motifs Found</a>  |
| 7    |       | 1e-26   | -6.041e+01   | 32.59%       | 8.99%           | 116.1bp (150.8bp) | 15-CTCTTGCT(0.689)<br><a href="#">More Information</a>   <a href="#">Similar Motifs Found</a>                                             |
| 8    |       | 1e-24   | -5.651e+01   | 12.53%       | 0.60%           | 116.3bp (164.1bp) | SeqBias: polyA-repeat(0.999)<br><a href="#">More Information</a>   <a href="#">Similar Motifs Found</a>                                   |
| 9    |       | 1e-24   | -5.559e+01   | 45.13%       | 18.25%          | 143.6bp (184.5bp) | ZNF189(Zf)/HEK293-ZNF189.GFP-ChIP-Seq(GSE58341)/Homer(0.750)<br><a href="#">More Information</a>   <a href="#">Similar Motifs Found</a>   |
| 10   |       | 1e-23   | -5.362e+01   | 16.16%       | 1.87%           | 106.1bp (147.8bp) | 1-CCACYAGRGG(0.776)<br><a href="#">More Information</a>   <a href="#">Similar Motifs Found</a>                                            |

## PRAD lost CTCF binding sites

| Rank | Motif | P-value | log P-pvalue | % of Targets | % of Background | STD(Bg STD)       | Best Match/Details                                                                                                                    |
|------|-------|---------|--------------|--------------|-----------------|-------------------|---------------------------------------------------------------------------------------------------------------------------------------|
| 1    |       | 1e-18   | -4.232e+01   | 59.34%       | 12.81%          | 196.2bp (217.2bp) | 4-GGGCGCTG(0.646)<br><a href="#">More Information</a>   <a href="#">Similar Motifs Found</a>                                          |
| 2    |       | 1e-18   | -4.210e+01   | 60.44%       | 13.58%          | 209.2bp (170.2bp) | SCL(bHLH)/HPC7-Scl-ChIP-Seq(GSE13511)/Homer(0.681)<br><a href="#">More Information</a>   <a href="#">Similar Motifs Found</a>         |
| 3    |       | 1e-15   | -3.673e+01   | 46.15%       | 7.78%           | 166.8bp (243.1bp) | E2F6(E2F)/Hela-E2F6-ChIP-Seq(GSE31477)/Homer(0.737)<br><a href="#">More Information</a>   <a href="#">Similar Motifs Found</a>        |
| 4    |       | 1e-14   | -3.406e+01   | 50.55%       | 11.10%          | 192.3bp (256.8bp) | AP-2gamma(AP2)/MCF7-TFAP2C-ChIP-Seq(GSE21234)/Homer(0.690)<br><a href="#">More Information</a>   <a href="#">Similar Motifs Found</a> |
| 5    |       | 1e-14   | -3.401e+01   | 47.25%       | 9.13%           | 213.6bp (275.5bp) | 2-CGTTCTACCT(0.681)<br><a href="#">More Information</a>   <a href="#">Similar Motifs Found</a>                                        |
| 6    |       | 1e-14   | -3.375e+01   | 32.97%       | 2.96%           | 160.6bp (500.2bp) | 2-AGCGCCCCCT(0.927)<br><a href="#">More Information</a>   <a href="#">Similar Motifs Found</a>                                        |
| 7    |       | 1e-13   | -3.204e+01   | 41.76%       | 7.10%           | 172.5bp (246.4bp) | 4-GGGCGCTG(0.684)<br><a href="#">More Information</a>   <a href="#">Similar Motifs Found</a>                                          |
| 8    |       | 1e-12   | -2.988e+01   | 51.65%       | 13.53%          | 191.1bp (165.7bp) | MyoG(bHLH)/C2C12-MyoG-ChIP-Seq(GSE36024)/Homer(0.654)<br><a href="#">More Information</a>   <a href="#">Similar Motifs Found</a>      |
| 9    |       | 1e-12   | -2.819e+01   | 68.13%       | 27.27%          | 214.0bp (176.1bp) | RARg(NR)/ES-RARg-ChIP-Seq(GSE30538)/Homer(0.584)<br><a href="#">More Information</a>   <a href="#">Similar Motifs Found</a>           |

## PRAD gained CTCF binding sites

| Rank | Motif | P-value | log P-pvalue | % of Targets | % of Background | STD(Bg STD)       | Best Match/Details                                                                                                                               |
|------|-------|---------|--------------|--------------|-----------------|-------------------|--------------------------------------------------------------------------------------------------------------------------------------------------|
| 1    |       | 1e-67   | -1.562e+02   | 37.86%       | 1.93%           | 47.2bp (86.6bp)   | CTCF(Zf)/CD4+-CTCF-ChIP-Seq(Barski_et_al.)/Homer(0.838)<br><a href="#">More Information</a>   <a href="#">Similar Motifs Found</a>               |
| 2    |       | 1e-43   | -1.010e+02   | 58.90%       | 18.00%          | 107.0bp (146.2bp) | SCL(bHLH)/HPC7-Scl-ChIP-Seq(GSE13511)/Homer(0.760)<br><a href="#">More Information</a>   <a href="#">Similar Motifs Found</a>                    |
| 3    |       | 1e-40   | -9.310e+01   | 64.08%       | 23.38%          | 100.2bp (143.4bp) | 15-GTCCCTCAC(0.752)<br><a href="#">More Information</a>   <a href="#">Similar Motifs Found</a>                                                   |
| 4    |       | 1e-34   | -7.934e+01   | 61.17%       | 23.78%          | 111.5bp (123.0bp) | SeqBias: GA-repeat(0.869)<br><a href="#">More Information</a>   <a href="#">Similar Motifs Found</a>                                             |
| 5    |       | 1e-25   | -5.774e+01   | 59.55%       | 27.48%          | 97.9bp (145.5bp)  | TBP3(MYBrelated)/col-TBP3-DAP-Seq(GSE60143)/Homer(0.793)<br><a href="#">More Information</a>   <a href="#">Similar Motifs Found</a>              |
| 6    |       | 1e-22   | -5.187e+01   | 37.86%       | 12.34%          | 97.8bp (129.2bp)  | VRN1(ABI3VP1)/col-VRN1-DAP-Seq(GSE60143)/Homer(0.876)<br><a href="#">More Information</a>   <a href="#">Similar Motifs Found</a>                 |
| 7    |       | 1e-20   | -4.799e+01   | 70.23%       | 40.47%          | 110.6bp (150.6bp) | bZIP18(bZIP)/colamp-bZIP18-DAP-Seq(GSE60143)/Homer(0.711)<br><a href="#">More Information</a>   <a href="#">Similar Motifs Found</a>             |
| 8    |       | 1e-18   | -4.298e+01   | 36.89%       | 13.52%          | 106.6bp (108.0bp) | EWS:ERG-fusion(ETS)/CADO_ES1-EWS:ERG-ChIP-Seq(SRA014231)/Homer(0.727)<br><a href="#">More Information</a>   <a href="#">Similar Motifs Found</a> |
| 9    |       | 1e-17   | -4.113e+01   | 23.95%       | 6.00%           | 94.1bp (106.3bp)  | Unknown1(NR/Ini-like)/Drosophila-Promoters/Homer(0.808)<br><a href="#">More Information</a>   <a href="#">Similar Motifs Found</a>               |
| 10   |       | 1e-15   | -3.510e+01   | 32.69%       | 12.48%          | 100.4bp (128.3bp) | TEAD2(TEA)/Py2T-Tead2-ChIP-Seq(GSE55709)/Homer(0.836)<br><a href="#">More Information</a>   <a href="#">Similar Motifs Found</a>                 |

## MEME Results

Top 10 motifs with  $p\text{-value} \leq 1e-2$  were shown for each dataset. N.A., no motifs were reported.

### T-ALL lost CTCF binding sites

|    | Logo | E-value  | Sites | Width |
|----|------|----------|-------|-------|
| 1. |      | 3.6e-030 | 45    | 20    |
| 2. |      | 2.1e-023 | 34    | 20    |
| 3. |      | 1.7e-011 | 84    | 19    |
| 4. |      | 3.0e-008 | 16    | 20    |
| 5. |      | 5.2e-003 | 4     | 20    |
| 6. |      | 2.2e-003 | 6     | 20    |

### T-ALL gained CTCF binding sites

|    | Logo | E-value  | Sites | Width |
|----|------|----------|-------|-------|
| 1. |      | 9.0e-019 | 64    | 14    |
| 2. |      | 8.8e-003 | 72    | 20    |

### AML lost CTCF binding sites

|    | Logo | E-value  | Sites | Width |
|----|------|----------|-------|-------|
| 1. |      | 8.7e-011 | 14    | 20    |
| 2. |      | 1.3e-005 | 38    | 15    |



## CRC gained CTCF binding sites

|    | Logo | E-value  | Sites | Width |
|----|------|----------|-------|-------|
| 1. |      | 4.6e-067 | 381   | 15    |
| 2. |      | 1.2e-040 | 95    | 20    |
| 3. |      | 2.5e-029 | 30    | 19    |
| 4. |      | 6.4e-027 | 88    | 20    |
| 5. |      | 3.8e-020 | 75    | 19    |
| 6. |      | 1.9e-031 | 107   | 20    |
| 7. |      | 7.1e-012 | 16    | 20    |
| 8. |      | 2.9e-009 | 7     | 19    |

## LUAD lost CTCF binding sites

|    | Logo | E-value  | Sites | Width |
|----|------|----------|-------|-------|
| 1. |      | 1.1e-011 | 23    | 20    |
| 2. |      | 2.4e-011 | 32    | 20    |
| 3. |      | 3.3e-008 | 51    | 20    |

## LUAD gained CTCF binding sites

|    | Logo | E-value  | Sites | Width |
|----|------|----------|-------|-------|
| 1. |      | 2.5e-040 | 127   | 20    |
| 2. |      | 1.6e-024 | 112   | 20    |
| 3. |      | 4.8e-021 | 11    | 20    |
| 4. |      | 1.3e-015 | 57    | 20    |
| 5. |      | 6.1e-015 | 118   | 20    |
| 6. |      | 6.2e-013 | 127   | 20    |
| 7. |      | 1.2e-011 | 58    | 15    |
| 8. |      | 4.4e-012 | 20    | 20    |
| 9. |      | 8.9e-009 | 14    | 19    |

**PRAD lost CTCF binding sites**

|    | Logo | E-value  | Sites | Width |
|----|------|----------|-------|-------|
| 1. |      | 4.6e-021 | 26    | 20    |
| 2. |      | 2.8e-012 | 32    | 20    |
| 3. |      | 1.1e-007 | 59    | 15    |

**PRAD gained CTCF binding sites**

|    | Logo | E-value  | Sites | Width |
|----|------|----------|-------|-------|
| 1. |      | 1.3e-104 | 309   | 18    |
| 2. |      | 1.7e-016 | 38    | 20    |
| 3. |      | 6.0e-014 | 45    | 20    |
| 4. |      | 1.8e-011 | 34    | 20    |
| 5. |      | 4.0e-010 | 78    | 20    |
| 6. |      | 2.8e-005 | 31    | 20    |
