# Supplementary material for: Cancer-specific CTCF binding facilitates oncogenic transcriptional dysregulation
Source: Genome Biol. 2020 Sep 15;21:247. doi: 10.1186/s13059-020-02152-7 (PMC7493976; doi:10.1186/s13059-020-02152-7)
Supplement: Supplementary file 2 — Additional file 2: Table S1. List of collected CTCF ChIP-seq datasets. [file 13059_2020_2152_MOESM2_ESM.xlsx]

## Sheet: 793 CTCF ChIP-seq
GSM	GSE	Cell Type	Tissue	Journal	PMID	Contact	Release Date	Library	Organism	# Peaks
GSM325895	GSE12889		CD4	Genome Res	19056695	Raja Jothi	2008-10-20	ChIP-Seq	Homo sapiens	23499
GSM325897	GSE12889	HeLa	cervix	Genome Res	19056695	Raja Jothi	2008-10-20	ChIP-Seq	Homo sapiens	12399
GSM325899	GSE12889	Jurkat	blood	Genome Res	19056695	Raja Jothi	2008-10-20	ChIP-Seq	Homo sapiens	14342
GSM518375	GSE20650			Nat Genet	20526341	Justin Jeyakani Joseph Gnanakkan	2010-03-06	ChIP-Seq	Homo sapiens	76230
GSM534471	GSE20752			Cell	20887899	Tarjei S Mikkelsen	2010-09-30	ChIP-Seq	Homo sapiens	47669
GSM534478	GSE20752			Cell	20887899	Tarjei S Mikkelsen	2010-09-30	ChIP-Seq	Homo sapiens	44756
GSM534485	GSE20752			Cell	20887899	Tarjei S Mikkelsen	2010-09-30	ChIP-Seq	Homo sapiens	28593
GSM534492	GSE20752			Cell	20887899	Tarjei S Mikkelsen	2010-09-30	ChIP-Seq	Homo sapiens	45465
GSM586887	GSE23784			Cell Metab	21035756	Francis S Collins	2010-11-02	ChIP-Seq	Homo sapiens	32408
GSM586888	GSE23784			Cell Metab	21035756	Francis S Collins	2010-11-02	ChIP-Seq	Homo sapiens	26860
GSM624077	GSE25442			Genome Res	21106903	Terry Furey	2010-11-18	ChIP-Seq	Homo sapiens	70084
GSM624078	GSE25442	HeLa, HeLa-S3	cervix	Genome Res	21106903	Terry Furey	2010-11-18	ChIP-Seq	Homo sapiens	79572
GSM624079	GSE25442	HUVEC	umbilical cord	Genome Res	21106903	Terry Furey	2010-11-18	ChIP-Seq	Homo sapiens	53268
GSM624080	GSE25442	K562	bone marrow	Genome Res	21106903	Terry Furey	2010-11-18	ChIP-Seq	Homo sapiens	72701
GSM624081	GSE25442	NHEK	skin	Genome Res	21106903	Terry Furey	2010-11-18	ChIP-Seq	Homo sapiens	87684
GSM631475	GSE25710	MCF7	breast			European Bioinformatics Institute	2010-12-04	ChIP-Seq	Homo sapiens	45507
GSM631476	GSE25710	MCF7	breast			European Bioinformatics Institute	2010-12-04	ChIP-Seq	Homo sapiens	54867
GSM631477	GSE25710	MCF7	breast			European Bioinformatics Institute	2010-12-04	ChIP-Seq	Homo sapiens	46894
GSM631478	GSE25710	MCF7	breast			European Bioinformatics Institute	2010-12-04	ChIP-Seq	Homo sapiens	60565
GSM631479	GSE25710	MCF7	breast			European Bioinformatics Institute	2010-12-04	ChIP-Seq	Homo sapiens	48888
GSM614614	GSE25021	MCF7	breast	Genome Res	20219941	European Bioinformatics Institute	2011-02-05	ChIP-Seq	Homo sapiens	46894
GSM614615	GSE25021	MCF7	breast	Genome Res	20219941	European Bioinformatics Institute	2011-02-05	ChIP-Seq	Homo sapiens	60565
GSM614630	GSE25021	HepG2	liver	Genome Res	20219941	European Bioinformatics Institute	2011-02-05	ChIP-Seq	Homo sapiens	61361
GSM614631	GSE25021	HepG2	liver	Genome Res	20219941	European Bioinformatics Institute	2011-02-05	ChIP-Seq	Homo sapiens	63209
GSM614636	GSE25021	MCF7	breast	Genome Res	20219941	European Bioinformatics Institute	2011-02-05	ChIP-Seq	Homo sapiens	36808
GSM614637	GSE25021	MCF7	breast	Genome Res	20219941	European Bioinformatics Institute	2011-02-05	ChIP-Seq	Homo sapiens	95072
GSM646314	GSE26320	GM12878	blood	Nature	21441907	Jason Ernst	2011-03-23	ChIP-Seq	Homo sapiens	37680
GSM646315	GSE26320	GM12878	blood	Nature	21441907	Jason Ernst	2011-03-23	ChIP-Seq	Homo sapiens	26743
GSM646334	GSE26320			Nature	21441907	Jason Ernst	2011-03-23	ChIP-Seq	Homo sapiens	56039
GSM646335	GSE26320			Nature	21441907	Jason Ernst	2011-03-23	ChIP-Seq	Homo sapiens	82900
GSM646353	GSE26320	HepG2	liver	Nature	21441907	Jason Ernst	2011-03-23	ChIP-Seq	Homo sapiens	57555
GSM646354	GSE26320	HepG2	liver	Nature	21441907	Jason Ernst	2011-03-23	ChIP-Seq	Homo sapiens	36977
GSM646372	GSE26320			Nature	21441907	Jason Ernst	2011-03-23	ChIP-Seq	Homo sapiens	44210
GSM646373	GSE26320			Nature	21441907	Jason Ernst	2011-03-23	ChIP-Seq	Homo sapiens	29443
GSM646392	GSE26320			Nature	21441907	Jason Ernst	2011-03-23	ChIP-Seq	Homo sapiens	43070
GSM646393	GSE26320			Nature	21441907	Jason Ernst	2011-03-23	ChIP-Seq	Homo sapiens	57304
GSM646412	GSE26320	HUVEC	umbilical cord	Nature	21441907	Jason Ernst	2011-03-23	ChIP-Seq	Homo sapiens	35652
GSM646413	GSE26320	HUVEC	umbilical cord	Nature	21441907	Jason Ernst	2011-03-23	ChIP-Seq	Homo sapiens	38945
GSM646432	GSE26320	K562	bone marrow	Nature	21441907	Jason Ernst	2011-03-23	ChIP-Seq	Homo sapiens	47416
GSM646433	GSE26320	K562	bone marrow	Nature	21441907	Jason Ernst	2011-03-23	ChIP-Seq	Homo sapiens	49992
GSM646454	GSE26320	NHEK	skin	Nature	21441907	Jason Ernst	2011-03-23	ChIP-Seq	Homo sapiens	46633
GSM646455	GSE26320	NHEK	skin	Nature	21441907	Jason Ernst	2011-03-23	ChIP-Seq	Homo sapiens	49950
GSM646474	GSE26320	NHLF	primary lung fibroblasts	Nature	21441907	Jason Ernst	2011-03-23	ChIP-Seq	Homo sapiens	29531
GSM646475	GSE26320	NHLF	primary lung fibroblasts	Nature	21441907	Jason Ernst	2011-03-23	ChIP-Seq	Homo sapiens	44150
GSM1003464	GSE29611	DND41	blood	Nature	22955616	ENCODE DCC	2011-06-02	ChIP-Seq	Homo sapiens	65221
GSM1003474	GSE29611			Nature	22955616	ENCODE DCC	2011-06-02	ChIP-Seq	Homo sapiens	46681
GSM1003508	GSE29611			Nature	22955616	ENCODE DCC	2011-06-02	ChIP-Seq	Homo sapiens	38151
GSM1003581	GSE29611	A549	lung	Nature	22955616	ENCODE DCC	2011-06-02	ChIP-Seq	Homo sapiens	70753
GSM1003582	GSE29611	A549	lung	Nature	22955616	ENCODE DCC	2011-06-02	ChIP-Seq	Homo sapiens	59757
GSM733636	GSE29611	NHEK	skin	Nature	22955616	ENCODE DCC	2011-06-02	ChIP-Seq	Homo sapiens	46619
GSM733645	GSE29611	HepG2	liver	Nature	22955616	ENCODE DCC	2011-06-02	ChIP-Seq	Homo sapiens	36977
GSM733672	GSE29611	hESC, H1-HESC	stem	Nature	22955616	ENCODE DCC	2011-06-02	ChIP-Seq	Homo sapiens	87184
GSM733695	GSE29611	NHLF	primary lung fibroblasts, lung	Nature	22955616	ENCODE DCC	2011-06-02	ChIP-Seq	Homo sapiens	48559
GSM733716	GSE29611	HUVEC	umbilical cord	Nature	22955616	ENCODE DCC	2011-06-02	ChIP-Seq	Homo sapiens	36091
GSM733719	GSE29611	K562	bone marrow	Nature	22955616	ENCODE DCC	2011-06-02	ChIP-Seq	Homo sapiens	61816
GSM733724	GSE29611			Nature	22955616	ENCODE DCC	2011-06-02	ChIP-Seq	Homo sapiens	45079
GSM733744	GSE29611			Nature	22955616	ENCODE DCC	2011-06-02	ChIP-Seq	Homo sapiens	55859
GSM733752	GSE29611	GM12878	blood	Nature	22955616	ENCODE DCC	2011-06-02	ChIP-Seq	Homo sapiens	47399
GSM733762	GSE29611			Nature	22955616	ENCODE DCC	2011-06-02	ChIP-Seq	Homo sapiens	43070
GSM733765	GSE29611			Nature	22955616	ENCODE DCC	2011-06-02	ChIP-Seq	Homo sapiens	42143
GSM733783	GSE29611			Nature	22955616	ENCODE DCC	2011-06-02	ChIP-Seq	Homo sapiens	56561
GSM733784	GSE29611	HOS	bone	Nature	22955616	ENCODE DCC	2011-06-02	ChIP-Seq	Homo sapiens	62495
GSM733785	GSE29611	HeLa, HeLa-S3	cervix	Nature	22955616	ENCODE DCC	2011-06-02	ChIP-Seq	Homo sapiens	60758
GSM1022626	GSE30263	NHLF	primary lung fibroblasts, lung	Genome Res	22955980	ENCODE DCC	2011-06-29	ChIP-Seq	Homo sapiens	39759
GSM1022628	GSE30263			Genome Res	22955980	ENCODE DCC	2011-06-29	ChIP-Seq	Homo sapiens	47183
GSM1022629	GSE30263	GM12873	blood	Genome Res	22955980	ENCODE DCC	2011-06-29	ChIP-Seq	Homo sapiens	56004
GSM1022630	GSE30263			Genome Res	22955980	ENCODE DCC	2011-06-29	ChIP-Seq	Homo sapiens	43167
GSM1022631	GSE30263			Genome Res	22955980	ENCODE DCC	2011-06-29	ChIP-Seq	Homo sapiens	50239
GSM1022633	GSE30263	GM12872	blood	Genome Res	22955980	ENCODE DCC	2011-06-29	ChIP-Seq	Homo sapiens	50339
GSM1022634	GSE30263	WI-38	fetal lung fibroblasts, lung	Genome Res	22955980	ENCODE DCC	2011-06-29	ChIP-Seq	Homo sapiens	24037
GSM1022635	GSE30263	AG04450	fetal lung fibroblast, lung	Genome Res	22955980	ENCODE DCC	2011-06-29	ChIP-Seq	Homo sapiens	45021
GSM1022636	GSE30263	GM12865	blood	Genome Res	22955980	ENCODE DCC	2011-06-29	ChIP-Seq	Homo sapiens	35735
GSM1022637	GSE30263	WI-38	fetal lung fibroblasts, lung	Genome Res	22955980	ENCODE DCC	2011-06-29	ChIP-Seq	Homo sapiens	31737
GSM1022639	GSE30263	A549	lung	Genome Res	22955980	ENCODE DCC	2011-06-29	ChIP-Seq	Homo sapiens	60439
GSM1022640	GSE30263	A549	lung	Genome Res	22955980	ENCODE DCC	2011-06-29	ChIP-Seq	Homo sapiens	34848
GSM1022643	GSE30263	NB4	bone marrow	Genome Res	22955980	ENCODE DCC	2011-06-29	ChIP-Seq	Homo sapiens	44316
GSM1022644	GSE30263			Genome Res	22955980	ENCODE DCC	2011-06-29	ChIP-Seq	Homo sapiens	48399
GSM1022650	GSE30263			Genome Res	22955980	ENCODE DCC	2011-06-29	ChIP-Seq	Homo sapiens	50855
GSM1022651	GSE30263	HCT116	colon	Genome Res	22955980	ENCODE DCC	2011-06-29	ChIP-Seq	Homo sapiens	42363
GSM1022652	GSE30263	HCT116	colon	Genome Res	22955980	ENCODE DCC	2011-06-29	ChIP-Seq	Homo sapiens	52021
GSM1022653	GSE30263			Genome Res	22955980	ENCODE DCC	2011-06-29	ChIP-Seq	Homo sapiens	56090
GSM1022657	GSE30263			Genome Res	22955980	ENCODE DCC	2011-06-29	ChIP-Seq	Homo sapiens	40006
GSM1022658	GSE30263	MCF7	breast	Genome Res	22955980	ENCODE DCC	2011-06-29	ChIP-Seq	Homo sapiens	65215
GSM1022661	GSE30263			Genome Res	22955980	ENCODE DCC	2011-06-29	ChIP-Seq	Homo sapiens	33425
GSM1022662	GSE30263			Genome Res	22955980	ENCODE DCC	2011-06-29	ChIP-Seq	Homo sapiens	53628
GSM1022663	GSE30263	MCF7	breast	Genome Res	22955980	ENCODE DCC	2011-06-29	ChIP-Seq	Homo sapiens	54608
GSM1022664	GSE30263	GM12864	blood	Genome Res	22955980	ENCODE DCC	2011-06-29	ChIP-Seq	Homo sapiens	44316
GSM1022665	GSE30263			Genome Res	22955980	ENCODE DCC	2011-06-29	ChIP-Seq	Homo sapiens	47814
GSM1022666	GSE30263	RPTEC	Kidney	Genome Res	22955980	ENCODE DCC	2011-06-29	ChIP-Seq	Homo sapiens	53333
GSM1022667	GSE30263	RPTEC	Kidney	Genome Res	22955980	ENCODE DCC	2011-06-29	ChIP-Seq	Homo sapiens	61080
GSM1022668	GSE30263			Genome Res	22955980	ENCODE DCC	2011-06-29	ChIP-Seq	Homo sapiens	40248
GSM1022669	GSE30263			Genome Res	22955980	ENCODE DCC	2011-06-29	ChIP-Seq	Homo sapiens	40401
GSM1022671	GSE30263			Genome Res	22955980	ENCODE DCC	2011-06-29	ChIP-Seq	Homo sapiens	41475
GSM1022675	GSE30263			Genome Res	22955980	ENCODE DCC	2011-06-29	ChIP-Seq	Homo sapiens	48961
GSM1022676	GSE30263			Genome Res	22955980	ENCODE DCC	2011-06-29	ChIP-Seq	Homo sapiens	40817
GSM1022677	GSE30263			Genome Res	22955980	ENCODE DCC	2011-06-29	ChIP-Seq	Homo sapiens	53487
GSM748538	GSE30226	HepG2	liver	Genome Res	21750106	Terry Furey	2011-06-29	ChIP-Seq	Homo sapiens	45428
GSM748539	GSE30226	HepG2	liver	Genome Res	21750106	Terry Furey	2011-06-29	ChIP-Seq	Homo sapiens	56832
GSM749665	GSE30263			Genome Res	22955980	ENCODE DCC	2011-06-29	ChIP-Seq	Homo sapiens	48741
GSM749666	GSE30263			Genome Res	22955980	ENCODE DCC	2011-06-29	ChIP-Seq	Homo sapiens	42905
GSM749667	GSE30263	SK-N-SH	brain	Genome Res	22955980	ENCODE DCC	2011-06-29	ChIP-Seq	Homo sapiens	54841
GSM749668	GSE30263	HEK293	kidney	Genome Res	22955980	ENCODE DCC	2011-06-29	ChIP-Seq	Homo sapiens	73856
GSM749670	GSE30263	GM12875	blood	Genome Res	22955980	ENCODE DCC	2011-06-29	ChIP-Seq	Homo sapiens	30011
GSM749673	GSE30263			Genome Res	22955980	ENCODE DCC	2011-06-29	ChIP-Seq	Homo sapiens	56849
GSM749674	GSE30263	HUVEC	umbilical cord	Genome Res	22955980	ENCODE DCC	2011-06-29	ChIP-Seq	Homo sapiens	50725
GSM749675	GSE30263			Genome Res	22955980	ENCODE DCC	2011-06-29	ChIP-Seq	Homo sapiens	53094
GSM749676	GSE30263	GM12864	blood	Genome Res	22955980	ENCODE DCC	2011-06-29	ChIP-Seq	Homo sapiens	47201
GSM749677	GSE30263			Genome Res	22955980	ENCODE DCC	2011-06-29	ChIP-Seq	Homo sapiens	55451
GSM749678	GSE30263			Genome Res	22955980	ENCODE DCC	2011-06-29	ChIP-Seq	Homo sapiens	48359
GSM749679	GSE30263	WERI-Rb-1	retina	Genome Res	22955980	ENCODE DCC	2011-06-29	ChIP-Seq	Homo sapiens	54096
GSM749680	GSE30263			Genome Res	22955980	ENCODE DCC	2011-06-29	ChIP-Seq	Homo sapiens	24734
GSM749681	GSE30263			Genome Res	22955980	ENCODE DCC	2011-06-29	ChIP-Seq	Homo sapiens	61406
GSM749683	GSE30263	HepG2	liver	Genome Res	22955980	ENCODE DCC	2011-06-29	ChIP-Seq	Homo sapiens	45334
GSM749684	GSE30263			Genome Res	22955980	ENCODE DCC	2011-06-29	ChIP-Seq	Homo sapiens	48183
GSM749686	GSE30263	GM12873	blood	Genome Res	22955980	ENCODE DCC	2011-06-29	ChIP-Seq	Homo sapiens	43207
GSM749687	GSE30263	HEK293	kidney	Genome Res	22955980	ENCODE DCC	2011-06-29	ChIP-Seq	Homo sapiens	46973
GSM749688	GSE30263	HL-60	blood	Genome Res	22955980	ENCODE DCC	2011-06-29	ChIP-Seq	Homo sapiens	36773
GSM749689	GSE30263	Caco-2	colon	Genome Res	22955980	ENCODE DCC	2011-06-29	ChIP-Seq	Homo sapiens	45420
GSM749690	GSE30263	K562	bone marrow	Genome Res	22955980	ENCODE DCC	2011-06-29	ChIP-Seq	Homo sapiens	50420
GSM749692	GSE30263	GM12872	blood	Genome Res	22955980	ENCODE DCC	2011-06-29	ChIP-Seq	Homo sapiens	39701
GSM749693	GSE30263	SK-N-SH	brain	Genome Res	22955980	ENCODE DCC	2011-06-29	ChIP-Seq	Homo sapiens	56294
GSM749694	GSE30263	GM12872	blood	Genome Res	22955980	ENCODE DCC	2011-06-29	ChIP-Seq	Homo sapiens	44329
GSM749695	GSE30263			Genome Res	22955980	ENCODE DCC	2011-06-29	ChIP-Seq	Homo sapiens	54406
GSM749696	GSE30263			Genome Res	22955980	ENCODE DCC	2011-06-29	ChIP-Seq	Homo sapiens	48417
GSM749699	GSE30263		lung	Genome Res	22955980	ENCODE DCC	2011-06-29	ChIP-Seq	Homo sapiens	47967
GSM749704	GSE30263	GM12878	blood	Genome Res	22955980	ENCODE DCC	2011-06-29	ChIP-Seq	Homo sapiens	35367
GSM749705	GSE30263	GM06990	blood	Genome Res	22955980	ENCODE DCC	2011-06-29	ChIP-Seq	Homo sapiens	51124
GSM749706	GSE30263	GM12878	blood	Genome Res	22955980	ENCODE DCC	2011-06-29	ChIP-Seq	Homo sapiens	45842
GSM749707	GSE30263	NHEK	skin	Genome Res	22955980	ENCODE DCC	2011-06-29	ChIP-Seq	Homo sapiens	57877
GSM749708	GSE30263	GM06990	blood	Genome Res	22955980	ENCODE DCC	2011-06-29	ChIP-Seq	Homo sapiens	47497
GSM749710	GSE30263			Genome Res	22955980	ENCODE DCC	2011-06-29	ChIP-Seq	Homo sapiens	48086
GSM749711	GSE30263			Genome Res	22955980	ENCODE DCC	2011-06-29	ChIP-Seq	Homo sapiens	21938
GSM749712	GSE30263			Genome Res	22955980	ENCODE DCC	2011-06-29	ChIP-Seq	Homo sapiens	50888
GSM749714	GSE30263			Genome Res	22955980	ENCODE DCC	2011-06-29	ChIP-Seq	Homo sapiens	44535
GSM749715	GSE30263	HepG2	liver	Genome Res	22955980	ENCODE DCC	2011-06-29	ChIP-Seq	Homo sapiens	69305
GSM749717	GSE30263		lung	Genome Res	22955980	ENCODE DCC	2011-06-29	ChIP-Seq	Homo sapiens	42711
GSM749723	GSE30263			Genome Res	22955980	ENCODE DCC	2011-06-29	ChIP-Seq	Homo sapiens	48040
GSM749725	GSE30263	GM12865	blood	Genome Res	22955980	ENCODE DCC	2011-06-29	ChIP-Seq	Homo sapiens	44311
GSM749726	GSE30263			Genome Res	22955980	ENCODE DCC	2011-06-29	ChIP-Seq	Homo sapiens	40192
GSM749727	GSE30263			Genome Res	22955980	ENCODE DCC	2011-06-29	ChIP-Seq	Homo sapiens	53664
GSM749728	GSE30263			Genome Res	22955980	ENCODE DCC	2011-06-29	ChIP-Seq	Homo sapiens	51771
GSM749729	GSE30263	HeLa, HeLa-S3	cervix	Genome Res	22955980	ENCODE DCC	2011-06-29	ChIP-Seq	Homo sapiens	38296
GSM749730	GSE30263	GM12873	blood	Genome Res	22955980	ENCODE DCC	2011-06-29	ChIP-Seq	Homo sapiens	48364
GSM749732	GSE30263			Genome Res	22955980	ENCODE DCC	2011-06-29	ChIP-Seq	Homo sapiens	54722
GSM749733	GSE30263	K562	bone marrow	Genome Res	22955980	ENCODE DCC	2011-06-29	ChIP-Seq	Homo sapiens	40297
GSM749735	GSE30263			Genome Res	22955980	ENCODE DCC	2011-06-29	ChIP-Seq	Homo sapiens	68664
GSM749736	GSE30263			Genome Res	22955980	ENCODE DCC	2011-06-29	ChIP-Seq	Homo sapiens	29422
GSM749737	GSE30263			Genome Res	22955980	ENCODE DCC	2011-06-29	ChIP-Seq	Homo sapiens	53090
GSM749739	GSE30263	HeLa, HeLa-S3	cervix	Genome Res	22955980	ENCODE DCC	2011-06-29	ChIP-Seq	Homo sapiens	53927
GSM749740	GSE30263	GM12865	blood	Genome Res	22955980	ENCODE DCC	2011-06-29	ChIP-Seq	Homo sapiens	39022
GSM749741	GSE30263	GM12874	blood	Genome Res	22955980	ENCODE DCC	2011-06-29	ChIP-Seq	Homo sapiens	46572
GSM749743	GSE30263			Genome Res	22955980	ENCODE DCC	2011-06-29	ChIP-Seq	Homo sapiens	73870
GSM749745	GSE30263			Genome Res	22955980	ENCODE DCC	2011-06-29	ChIP-Seq	Homo sapiens	57838
GSM749747	GSE30263	NHEK	skin	Genome Res	22955980	ENCODE DCC	2011-06-29	ChIP-Seq	Homo sapiens	50476
GSM749748	GSE30263	Caco-2	colon	Genome Res	22955980	ENCODE DCC	2011-06-29	ChIP-Seq	Homo sapiens	51441
GSM749749	GSE30263	HUVEC	umbilical cord	Genome Res	22955980	ENCODE DCC	2011-06-29	ChIP-Seq	Homo sapiens	42859
GSM749750	GSE30263			Genome Res	22955980	ENCODE DCC	2011-06-29	ChIP-Seq	Homo sapiens	46512
GSM749751	GSE30263			Genome Res	22955980	ENCODE DCC	2011-06-29	ChIP-Seq	Homo sapiens	54791
GSM749752	GSE30263			Genome Res	22955980	ENCODE DCC	2011-06-29	ChIP-Seq	Homo sapiens	43818
GSM749753	GSE30263			Genome Res	22955980	ENCODE DCC	2011-06-29	ChIP-Seq	Homo sapiens	62399
GSM749757	GSE30263	GM12874	blood	Genome Res	22955980	ENCODE DCC	2011-06-29	ChIP-Seq	Homo sapiens	42523
GSM749759	GSE30263			Genome Res	22955980	ENCODE DCC	2011-06-29	ChIP-Seq	Homo sapiens	50917
GSM749762	GSE30263	GM12864	blood	Genome Res	22955980	ENCODE DCC	2011-06-29	ChIP-Seq	Homo sapiens	41413
GSM749764	GSE30263	GM12875	blood	Genome Res	22955980	ENCODE DCC	2011-06-29	ChIP-Seq	Homo sapiens	49036
GSM749768	GSE30263	WERI-Rb-1	retina	Genome Res	22955980	ENCODE DCC	2011-06-29	ChIP-Seq	Homo sapiens	72444
GSM749769	GSE30263	AG04450	fetal lung fibroblast, lung	Genome Res	22955980	ENCODE DCC	2011-06-29	ChIP-Seq	Homo sapiens	47318
GSM749779	GSE30263			Genome Res	22955980	ENCODE DCC	2011-06-29	ChIP-Seq	Homo sapiens	53527
GSM849300	GSE30263	GM12868	blood	Genome Res	22955980	ENCODE DCC	2011-06-29	ChIP-Seq	Homo sapiens	45886
GSM849301	GSE30263	GM12867	blood	Genome Res	22955980	ENCODE DCC	2011-06-29	ChIP-Seq	Homo sapiens	42811
GSM849302	GSE30263	GM12870	blood	Genome Res	22955980	ENCODE DCC	2011-06-29	ChIP-Seq	Homo sapiens	42297
GSM849303	GSE30263	GM12869	blood	Genome Res	22955980	ENCODE DCC	2011-06-29	ChIP-Seq	Homo sapiens	47894
GSM849304	GSE30263	GM12871	blood	Genome Res	22955980	ENCODE DCC	2011-06-29	ChIP-Seq	Homo sapiens	53508
GSM849305	GSE30263	GM12866	blood	Genome Res	22955980	ENCODE DCC	2011-06-29	ChIP-Seq	Homo sapiens	46113
GSM651541	GSE26501			Genome Res	21795385;27141965	Gangqing Hu	2011-07-01	ChIP-Seq	Homo sapiens	19383
GSM651542	GSE26501			Genome Res	21795385;27141965	Gangqing Hu	2011-07-01	ChIP-Seq	Homo sapiens	39214
GSM651543	GSE26501			Genome Res	21795385;27141965	Gangqing Hu	2011-07-01	ChIP-Seq	Homo sapiens	34610
GSM1003606	GSE31477	A549	lung			ENCODE DCC	2011-08-30	ChIP-Seq	Homo sapiens	54004
GSM1003633	GSE31477	SK-N-SH	brain			ENCODE DCC	2011-08-30	ChIP-Seq	Homo sapiens	63860
GSM935404	GSE31477	IMR90	lung			ENCODE DCC	2011-08-30	ChIP-Seq	Homo sapiens	53928
GSM935407	GSE31477	K562	bone marrow			ENCODE DCC	2011-08-30	ChIP-Seq	Homo sapiens	72836
GSM935611	GSE31477	GM12878	blood			ENCODE DCC	2011-08-30	ChIP-Seq	Homo sapiens	76643
GSM1010734	GSE32465	MCF7	breast	Mol Cell	24076218	ENCODE DCC	2011-09-29	ChIP-Seq	Homo sapiens	65610
GSM1010774	GSE32465	ECC-1	uterus	Mol Cell	24076218	ENCODE DCC	2011-09-29	ChIP-Seq	Homo sapiens	26411
GSM1010820	GSE32465	K562	bone marrow	Mol Cell	24076218	ENCODE DCC	2011-09-29	ChIP-Seq	Homo sapiens	58944
GSM1010903	GSE32465	HCT116	colon	Mol Cell	24076218	ENCODE DCC	2011-09-29	ChIP-Seq	Homo sapiens	54768
GSM803333	GSE32465	SK-N-SH	brain	Mol Cell	24076218	ENCODE DCC	2011-09-29	ChIP-Seq	Homo sapiens	52991
GSM803348	GSE32465	T47D	breast	Mol Cell	24076218	ENCODE DCC	2011-09-29	ChIP-Seq	Homo sapiens	36654
GSM803419	GSE32465	hESC, H1-HESC	stem	Mol Cell	24076218	ENCODE DCC	2011-09-29	ChIP-Seq	Homo sapiens	101440
GSM803453	GSE32465	A549	lung	Mol Cell	24076218	ENCODE DCC	2011-09-29	ChIP-Seq	Homo sapiens	48882
GSM803456	GSE32465	A549	lung	Mol Cell	24076218	ENCODE DCC	2011-09-29	ChIP-Seq	Homo sapiens	43978
GSM803486	GSE32465	HepG2	liver	Mol Cell	24076218	ENCODE DCC	2011-09-29	ChIP-Seq	Homo sapiens	73965
GSM782156	GSE31278			Nature	21964334	Shalini Oberdoerffer	2011-10-06	ChIP-Seq	Homo sapiens	20016
GSM782158	GSE31278	BL-41	blood	Nature	21964334	Shalini Oberdoerffer	2011-10-06	ChIP-Seq	Homo sapiens	22631
GSM489290	GSE32883	GM12878	blood	Genome Res	22090374	Vishy Iyer	2011-10-18	ChIP-Seq	Homo sapiens	46656
GSM489291	GSE32883	GM12878	blood	Genome Res	22090374	Vishy Iyer	2011-10-18	ChIP-Seq	Homo sapiens	41451
GSM489292	GSE32883	GM12878	blood	Genome Res	22090374	Vishy Iyer	2011-10-18	ChIP-Seq	Homo sapiens	51910
GSM489293	GSE32883	GM12891	blood	Genome Res	22090374	Vishy Iyer	2011-10-18	ChIP-Seq	Homo sapiens	47307
GSM489294	GSE32883	GM12891	blood	Genome Res	22090374	Vishy Iyer	2011-10-18	ChIP-Seq	Homo sapiens	53111
GSM489295	GSE32883	GM12892	blood	Genome Res	22090374	Vishy Iyer	2011-10-18	ChIP-Seq	Homo sapiens	71189
GSM489296	GSE32883	GM12892	blood	Genome Res	22090374	Vishy Iyer	2011-10-18	ChIP-Seq	Homo sapiens	56935
GSM489297	GSE32883			Genome Res	22090374	Vishy Iyer	2011-10-18	ChIP-Seq	Homo sapiens	51920
GSM489298	GSE32883			Genome Res	22090374	Vishy Iyer	2011-10-18	ChIP-Seq	Homo sapiens	50663
GSM489299	GSE32883			Genome Res	22090374	Vishy Iyer	2011-10-18	ChIP-Seq	Homo sapiens	58536
GSM489300	GSE32883			Genome Res	22090374	Vishy Iyer	2011-10-18	ChIP-Seq	Homo sapiens	55417
GSM489301	GSE32883	GM19239	blood	Genome Res	22090374	Vishy Iyer	2011-10-18	ChIP-Seq	Homo sapiens	64377
GSM489302	GSE32883	GM19239	blood	Genome Res	22090374	Vishy Iyer	2011-10-18	ChIP-Seq	Homo sapiens	34406
GSM808752	GSE32883	MCF7	breast	Genome Res	22090374	Vishy Iyer	2011-10-18	ChIP-Seq	Homo sapiens	75011
GSM808753	GSE32883	MCF7	breast	Genome Res	22090374	Vishy Iyer	2011-10-18	ChIP-Seq	Homo sapiens	83541
GSM808759	GSE32883			Genome Res	22090374	Vishy Iyer	2011-10-18	ChIP-Seq	Homo sapiens	47397
GSM808760	GSE32883			Genome Res	22090374	Vishy Iyer	2011-10-18	ChIP-Seq	Homo sapiens	43803
GSM808764	GSE32883			Genome Res	22090374	Vishy Iyer	2011-10-18	ChIP-Seq	Homo sapiens	47697
GSM808765	GSE32883			Genome Res	22090374	Vishy Iyer	2011-10-18	ChIP-Seq	Homo sapiens	45924
GSM808771	GSE32883	H54	brain	Genome Res	22090374	Vishy Iyer	2011-10-18	ChIP-Seq	Homo sapiens	63073
GSM808772	GSE32883	H54	brain	Genome Res	22090374	Vishy Iyer	2011-10-18	ChIP-Seq	Homo sapiens	69260
GSM1006869	GSE33213	GM13977	blood			ENCODE DCC	2011-10-25	ChIP-Seq	Homo sapiens	52153
GSM1006870	GSE33213	GM10266	blood			ENCODE DCC	2011-10-25	ChIP-Seq	Homo sapiens	49780
GSM1006873	GSE33213	GM20000	blood			ENCODE DCC	2011-10-25	ChIP-Seq	Homo sapiens	35386
GSM1006874	GSE33213	LNCaP	prostate			ENCODE DCC	2011-10-25	ChIP-Seq	Homo sapiens	54381
GSM1006875	GSE33213	MCF7	breast			ENCODE DCC	2011-10-25	ChIP-Seq	Homo sapiens	143290
GSM1006878	GSE33213	MCF7	breast			ENCODE DCC	2011-10-25	ChIP-Seq	Homo sapiens	198021
GSM1006881	GSE33213		pancreas			ENCODE DCC	2011-10-25	ChIP-Seq	Homo sapiens	47030
GSM1006882	GSE33213		lung			ENCODE DCC	2011-10-25	ChIP-Seq	Homo sapiens	35817
GSM1006883	GSE33213					ENCODE DCC	2011-10-25	ChIP-Seq	Homo sapiens	50721
GSM1006885	GSE33213	GM13976	blood			ENCODE DCC	2011-10-25	ChIP-Seq	Homo sapiens	34957
GSM1006886	GSE33213		kidney			ENCODE DCC	2011-10-25	ChIP-Seq	Homo sapiens	46197
GSM1006887	GSE33213	LNCaP	prostate			ENCODE DCC	2011-10-25	ChIP-Seq	Homo sapiens	49770
GSM1006891	GSE33213	GM10248	blood			ENCODE DCC	2011-10-25	ChIP-Seq	Homo sapiens	43389
GSM1006893	GSE33213					ENCODE DCC	2011-10-25	ChIP-Seq	Homo sapiens	55308
GSM822271	GSE33213	NHEK	skin			ENCODE DCC	2011-10-25	ChIP-Seq	Homo sapiens	87684
GSM822276	GSE33213					ENCODE DCC	2011-10-25	ChIP-Seq	Homo sapiens	70653
GSM822277	GSE33213	GM19239	blood			ENCODE DCC	2011-10-25	ChIP-Seq	Homo sapiens	74492
GSM822278	GSE33213					ENCODE DCC	2011-10-25	ChIP-Seq	Homo sapiens	74140
GSM822279	GSE33213	HUVEC	umbilical cord			ENCODE DCC	2011-10-25	ChIP-Seq	Homo sapiens	53268
GSM822285	GSE33213	HeLa, HeLa-S3	cervix			ENCODE DCC	2011-10-25	ChIP-Seq	Homo sapiens	79572
GSM822287	GSE33213	HepG2	liver			ENCODE DCC	2011-10-25	ChIP-Seq	Homo sapiens	63891
GSM822289	GSE33213	A549	lung			ENCODE DCC	2011-10-25	ChIP-Seq	Homo sapiens	129061
GSM822294	GSE33213	GM12891	blood			ENCODE DCC	2011-10-25	ChIP-Seq	Homo sapiens	74484
GSM822297	GSE33213	hESC, H1-HESC	stem			ENCODE DCC	2011-10-25	ChIP-Seq	Homo sapiens	70084
GSM822299	GSE33213	GM12892	blood			ENCODE DCC	2011-10-25	ChIP-Seq	Homo sapiens	86181
GSM822303	GSE33213	H54	brain			ENCODE DCC	2011-10-25	ChIP-Seq	Homo sapiens	100187
GSM822305	GSE33213	MCF7	breast			ENCODE DCC	2011-10-25	ChIP-Seq	Homo sapiens	118572
GSM822308	GSE33213	MCF7	breast			ENCODE DCC	2011-10-25	ChIP-Seq	Homo sapiens	122407
GSM822309	GSE33213	MCF7	breast			ENCODE DCC	2011-10-25	ChIP-Seq	Homo sapiens	172101
GSM822311	GSE33213	K562	bone marrow			ENCODE DCC	2011-10-25	ChIP-Seq	Homo sapiens	77764
GSM822312	GSE33213	GM12878	blood			ENCODE DCC	2011-10-25	ChIP-Seq	Homo sapiens	64168
GSM941710	GSE38411	BCBL1	blood	J Virol	22740398	Priyankara J Wickramasinghe	2012-06-02	ChIP-Seq	Homo sapiens	65130
GSM1007997	GSE41050	WI-38	fetal lung fibroblasts, lung	Nat Genet	23064413	Gilad Landan	2012-09-24	ChIP-Seq	Homo sapiens	21372
GSM1007998	GSE41050	WI-38	fetal lung fibroblasts, lung	Nat Genet	23064413	Gilad Landan	2012-09-24	ChIP-Seq	Homo sapiens	14139
GSM908064	GSE36985		liver	Dev Cell	23041383	Jian Xu	2012-10-05	ChIP-Seq	Homo sapiens	209
GSM908065	GSE36985			Dev Cell	23041383	Jian Xu	2012-10-05	ChIP-Seq	Homo sapiens	1205
GSM947527	GSE38684			Cancer Cell	23245995	Aaron Statham	2012-11-30	ChIP-Seq	Homo sapiens	40053
GSM947528	GSE38684	LNCaP	prostate	Cancer Cell	23245995	Aaron Statham	2012-11-30	ChIP-Seq	Homo sapiens	39391
GSM1056576	GSE43098			Nucleic Acids Res	23658224	Michael Rehli	2013-05-15	ChIP-Seq	Homo sapiens	11500
GSM1056577	GSE43098			Nucleic Acids Res	23658224	Michael Rehli	2013-05-15	ChIP-Seq	Homo sapiens	14711
GSM1208603	GSE49402	LoVo	colon	Cell	23953112	Martin Enge	2013-08-15	ChIP-Seq	Homo sapiens	34331
GSM1239390	GSE51142	LoVo	colon	Cell	23953112	Martin Enge	2013-09-25	ChIP-Seq	Homo sapiens	15515
GSM1239427	GSE51142	LoVo	colon	Cell	23953112	Martin Enge	2013-09-25	ChIP-Seq	Homo sapiens	27865
GSM1239588	GSE51142	LoVo	colon	Cell	23953112	Martin Enge	2013-09-25	ChIP-Seq	Homo sapiens	22852
GSM1240813	GSE51234	GP5d	colon	Cell	23953112	Martin Enge	2013-09-28	ChIP-Seq	Homo sapiens	48152
GSM1240827	GSE51234	GP5d	colon	Cell	23953112	Martin Enge	2013-09-28	ChIP-Seq	Homo sapiens	25655
GSM1233869	GSE50893	GM10847	blood	Science	24136358	Maya Kasowski	2013-10-18	ChIP-Seq	Homo sapiens	45359
GSM1233870	GSE50893	GM10847	blood	Science	24136358	Maya Kasowski	2013-10-18	ChIP-Seq	Homo sapiens	41917
GSM1233871	GSE50893	GM10847	blood	Science	24136358	Maya Kasowski	2013-10-18	ChIP-Seq	Homo sapiens	6795
GSM1233887	GSE50893	GM12878	blood	Science	24136358	Maya Kasowski	2013-10-18	ChIP-Seq	Homo sapiens	68384
GSM1233888	GSE50893	GM12878	blood	Science	24136358	Maya Kasowski	2013-10-18	ChIP-Seq	Homo sapiens	74201
GSM1233914	GSE50893			Science	24136358	Maya Kasowski	2013-10-18	ChIP-Seq	Homo sapiens	66920
GSM1233915	GSE50893			Science	24136358	Maya Kasowski	2013-10-18	ChIP-Seq	Homo sapiens	67944
GSM1233916	GSE50893			Science	24136358	Maya Kasowski	2013-10-18	ChIP-Seq	Homo sapiens	58036
GSM1233933	GSE50893	GM12891	blood	Science	24136358	Maya Kasowski	2013-10-18	ChIP-Seq	Homo sapiens	70947
GSM1233934	GSE50893	GM12891	blood	Science	24136358	Maya Kasowski	2013-10-18	ChIP-Seq	Homo sapiens	83551
GSM1233955	GSE50893	GM12892	blood	Science	24136358	Maya Kasowski	2013-10-18	ChIP-Seq	Homo sapiens	67227
GSM1233956	GSE50893	GM12892	blood	Science	24136358	Maya Kasowski	2013-10-18	ChIP-Seq	Homo sapiens	73624
GSM1233977	GSE50893			Science	24136358	Maya Kasowski	2013-10-18	ChIP-Seq	Homo sapiens	68852
GSM1233978	GSE50893			Science	24136358	Maya Kasowski	2013-10-18	ChIP-Seq	Homo sapiens	40314
GSM1233979	GSE50893			Science	24136358	Maya Kasowski	2013-10-18	ChIP-Seq	Homo sapiens	55422
GSM1233993	GSE50893	GM18505	blood	Science	24136358	Maya Kasowski	2013-10-18	ChIP-Seq	Homo sapiens	45267
GSM1233994	GSE50893	GM18505	blood	Science	24136358	Maya Kasowski	2013-10-18	ChIP-Seq	Homo sapiens	41406
GSM1234010	GSE50893	GM18526	blood	Science	24136358	Maya Kasowski	2013-10-18	ChIP-Seq	Homo sapiens	52485
GSM1234011	GSE50893	GM18526	blood	Science	24136358	Maya Kasowski	2013-10-18	ChIP-Seq	Homo sapiens	40466
GSM1234027	GSE50893	GM18951	blood	Science	24136358	Maya Kasowski	2013-10-18	ChIP-Seq	Homo sapiens	43168
GSM1234028	GSE50893	GM18951	blood	Science	24136358	Maya Kasowski	2013-10-18	ChIP-Seq	Homo sapiens	43118
GSM1234044	GSE50893	GM19099	blood	Science	24136358	Maya Kasowski	2013-10-18	ChIP-Seq	Homo sapiens	50271
GSM1234045	GSE50893	GM19099	blood	Science	24136358	Maya Kasowski	2013-10-18	ChIP-Seq	Homo sapiens	41947
GSM1234061	GSE50893	GM19193	blood	Science	24136358	Maya Kasowski	2013-10-18	ChIP-Seq	Homo sapiens	46993
GSM1234062	GSE50893	GM19193	blood	Science	24136358	Maya Kasowski	2013-10-18	ChIP-Seq	Homo sapiens	49573
GSM1234078	GSE50893			Science	24136358	Maya Kasowski	2013-10-18	ChIP-Seq	Homo sapiens	64853
GSM1234079	GSE50893			Science	24136358	Maya Kasowski	2013-10-18	ChIP-Seq	Homo sapiens	80361
GSM1234099	GSE50893	GM19239	blood	Science	24136358	Maya Kasowski	2013-10-18	ChIP-Seq	Homo sapiens	69896
GSM1234100	GSE50893	GM19239	blood	Science	24136358	Maya Kasowski	2013-10-18	ChIP-Seq	Homo sapiens	66149
GSM1234121	GSE50893			Science	24136358	Maya Kasowski	2013-10-18	ChIP-Seq	Homo sapiens	68098
GSM1234122	GSE50893			Science	24136358	Maya Kasowski	2013-10-18	ChIP-Seq	Homo sapiens	73308
GSM1234144	GSE50893			Science	24136358	Maya Kasowski	2013-10-18	ChIP-Seq	Homo sapiens	64076
GSM1234145	GSE50893			Science	24136358	Maya Kasowski	2013-10-18	ChIP-Seq	Homo sapiens	71391
GSM1234146	GSE50893			Science	24136358	Maya Kasowski	2013-10-18	ChIP-Seq	Homo sapiens	60193
GSM1234162	GSE50893			Science	24136358	Maya Kasowski	2013-10-18	ChIP-Seq	Homo sapiens	68233
GSM1234163	GSE50893			Science	24136358	Maya Kasowski	2013-10-18	ChIP-Seq	Homo sapiens	74055
GSM1234164	GSE50893			Science	24136358	Maya Kasowski	2013-10-18	ChIP-Seq	Homo sapiens	61754
GSM1234180	GSE50893			Science	24136358	Maya Kasowski	2013-10-18	ChIP-Seq	Homo sapiens	68804
GSM1234181	GSE50893			Science	24136358	Maya Kasowski	2013-10-18	ChIP-Seq	Homo sapiens	73766
GSM1234182	GSE50893			Science	24136358	Maya Kasowski	2013-10-18	ChIP-Seq	Homo sapiens	64864
GSM1234198	GSE50893			Science	24136358	Maya Kasowski	2013-10-18	ChIP-Seq	Homo sapiens	73429
GSM1234199	GSE50893			Science	24136358	Maya Kasowski	2013-10-18	ChIP-Seq	Homo sapiens	76048
GSM1234200	GSE50893			Science	24136358	Maya Kasowski	2013-10-18	ChIP-Seq	Homo sapiens	65347
GSM1234216	GSE50893			Science	24136358	Maya Kasowski	2013-10-18	ChIP-Seq	Homo sapiens	67293
GSM1234217	GSE50893			Science	24136358	Maya Kasowski	2013-10-18	ChIP-Seq	Homo sapiens	75313
GSM1234218	GSE50893			Science	24136358	Maya Kasowski	2013-10-18	ChIP-Seq	Homo sapiens	85169
GSM1234219	GSE50893			Science	24136358	Maya Kasowski	2013-10-18	ChIP-Seq	Homo sapiens	61212
GSM1055825	GSE43070	IMR90	lung	Nature	24141950	Fulai Jin	2013-10-20	ChIP-Seq	Homo sapiens	44047
GSM1070125	GSE43743	MM.1S	blood	Nat Biotechnol	24336317	Richard A Young	2013-12-13	ChIP-Seq	Homo sapiens	60900
GSM1335528	GSE55408	THP-1	blood	Genome Biol	24995990	JosÃ©e Dostie	2014-02-27	ChIP-Seq	Homo sapiens	38400
GSM1224649	GSE50610	HCT116	colon	Cell Rep	26257180	Matthew T Maurano	2014-02-28	ChIP-Seq	Homo sapiens	42385
GSM1224650	GSE50610	HCT116	colon	Cell Rep	26257180	Matthew T Maurano	2014-02-28	ChIP-Seq	Homo sapiens	52042
GSM1224651	GSE50610	HCT116	colon	Cell Rep	26257180	Matthew T Maurano	2014-02-28	ChIP-Seq	Homo sapiens	45369
GSM1224652	GSE50610	HCT116	colon	Cell Rep	26257180	Matthew T Maurano	2014-02-28	ChIP-Seq	Homo sapiens	36079
GSM1224653	GSE50610	HCT116	colon	Cell Rep	26257180	Matthew T Maurano	2014-02-28	ChIP-Seq	Homo sapiens	51750
GSM1224654	GSE50610	HCT116	colon	Cell Rep	26257180	Matthew T Maurano	2014-02-28	ChIP-Seq	Homo sapiens	49084
GSM1224655	GSE50610	HCT116	colon	Cell Rep	26257180	Matthew T Maurano	2014-02-28	ChIP-Seq	Homo sapiens	45381
GSM1224656	GSE50610	K562	bone marrow	Cell Rep	26257180	Matthew T Maurano	2014-02-28	ChIP-Seq	Homo sapiens	49521
GSM1224657	GSE50610	K562	bone marrow	Cell Rep	26257180	Matthew T Maurano	2014-02-28	ChIP-Seq	Homo sapiens	14736
GSM1224658	GSE50610	K562	bone marrow	Cell Rep	26257180	Matthew T Maurano	2014-02-28	ChIP-Seq	Homo sapiens	41023
GSM1224659	GSE50610	K562	bone marrow	Cell Rep	26257180	Matthew T Maurano	2014-02-28	ChIP-Seq	Homo sapiens	49998
GSM1224660	GSE50610	K562	bone marrow	Cell Rep	26257180	Matthew T Maurano	2014-02-28	ChIP-Seq	Homo sapiens	36431
GSM1383877	GSE57498	PC3	prostate	Genome Res	24916973	Aaron Statham	2014-06-04	ChIP-Seq	Homo sapiens	55995
GSM1122667	GSE46073	SUM159	breast	Cancer Cell	24937458	Kornelia Polyak	2014-06-17	ChIP-Seq	Homo sapiens	160491
GSM1273199	GSE52637			J Clin Invest	24614105	Supat Thongjuea	2014-07-24	ChIP-Seq	Homo sapiens	90061
GSM1463918	GSE60024					Richard A Young	2014-08-03	ChIP-Seq	Homo sapiens	42072
GSM1354438	GSE56051	BEAS-2B	lung	Proc Natl Acad Sci U S A	25246589	Dustin E Schones	2014-09-26	ChIP-Seq	Homo sapiens	16139
GSM1354439	GSE56051	BEAS-2B	lung	Proc Natl Acad Sci U S A	25246589	Dustin E Schones	2014-09-26	ChIP-Seq	Homo sapiens	25181
GSM1294054	GSE53463	T47D	breast	Genes Dev	25274727	Miguel Beato	2014-10-06	ChIP-Seq	Homo sapiens	48874
GSM1294055	GSE53463	T47D	breast	Genes Dev	25274727	Miguel Beato	2014-10-06	ChIP-Seq	Homo sapiens	49996
GSM1224672	GSE50611	K562	bone marrow	Nat Biotechnol	25580597	Matthew T Maurano	2014-10-07	ChIP-Seq	Homo sapiens	25723
GSM1224673	GSE50611	K562	bone marrow	Nat Biotechnol	25580597	Matthew T Maurano	2014-10-07	ChIP-Seq	Homo sapiens	49391
GSM1224674	GSE50611	K562	bone marrow	Nat Biotechnol	25580597	Matthew T Maurano	2014-10-07	ChIP-Seq	Homo sapiens	35936
GSM1224675	GSE50611	K562	bone marrow	Nat Biotechnol	25580597	Matthew T Maurano	2014-10-07	ChIP-Seq	Homo sapiens	40297
GSM1267206	GSE52457			Nature	25693564	Jesse R Dixon	2015-02-18	ChIP-Seq	Homo sapiens	107863
GSM1267207	GSE52457			Nature	25693564	Jesse R Dixon	2015-02-18	ChIP-Seq	Homo sapiens	97256
GSM1267208	GSE52457			Nature	25693564	Jesse R Dixon	2015-02-18	ChIP-Seq	Homo sapiens	46890
GSM1267209	GSE52457			Nature	25693564	Jesse R Dixon	2015-02-18	ChIP-Seq	Homo sapiens	56068
GSM1267210	GSE52457			Nature	25693564	Jesse R Dixon	2015-02-18	ChIP-Seq	Homo sapiens	85834
GSM1505620	GSE61475			Nature	25693565	Alexander Tsankov	2015-02-19	ChIP-Seq	Homo sapiens	75149
GSM1505621	GSE61475			Nature	25693565	Alexander Tsankov	2015-02-19	ChIP-Seq	Homo sapiens	8646
GSM1505622	GSE61475			Nature	25693565	Alexander Tsankov	2015-02-19	ChIP-Seq	Homo sapiens	31068
GSM1505623	GSE61475			Nature	25693565	Alexander Tsankov	2015-02-19	ChIP-Seq	Homo sapiens	17523
GSM1505624	GSE61475			Nature	25693565	Alexander Tsankov	2015-02-19	ChIP-Seq	Homo sapiens	28485
GSM1505625	GSE61475			Nature	25693565	Alexander Tsankov	2015-02-19	ChIP-Seq	Homo sapiens	21214
GSM1505626	GSE61475			Nature	25693565	Alexander Tsankov	2015-02-19	ChIP-Seq	Homo sapiens	24821
GSM1689152	GSE68978	Jurkat	blood	Science	26940867	Richard A Young	2015-05-28	ChIP-Seq	Homo sapiens	68120
GSM1910997	GSE68978	HEK293, 293T, HEK293T	kidney	Science	26940867	Richard A Young	2015-05-28	ChIP-Seq	Homo sapiens	34244
GSM1910998	GSE68978	HEK293, 293T, HEK293T	kidney	Science	26940867	Richard A Young	2015-05-28	ChIP-Seq	Homo sapiens	30837
GSM1817654	GSE70764	K562	bone marrow	Genome Biol	26268681	Elena Pugacheva	2015-07-23	ChIP-Seq	Homo sapiens	75720
GSM1817657	GSE70764	K562	bone marrow	Genome Biol	26268681	Elena Pugacheva	2015-07-23	ChIP-Seq	Homo sapiens	853
GSM1817658	GSE70764			Genome Biol	26268681	Elena Pugacheva	2015-07-23	ChIP-Seq	Homo sapiens	44554
GSM1817661	GSE70764			Genome Biol	26268681	Elena Pugacheva	2015-07-23	ChIP-Seq	Homo sapiens	340
GSM1817662	GSE70764	Ovcar8	ovary	Genome Biol	26268681	Elena Pugacheva	2015-07-23	ChIP-Seq	Homo sapiens	35493
GSM1817665	GSE70764	MCF7	breast	Genome Biol	26268681	Elena Pugacheva	2015-07-23	ChIP-Seq	Homo sapiens	63593
GSM1817666	GSE70764	MCF7	breast	Genome Biol	26268681	Elena Pugacheva	2015-07-23	ChIP-Seq	Homo sapiens	74686
GSM1817667	GSE70764	MCF7	breast	Genome Biol	26268681	Elena Pugacheva	2015-07-23	ChIP-Seq	Homo sapiens	78230
GSM1782700	GSE70482	K562	bone marrow	Nat Methods	26280331	Christoph Bock	2015-08-17	ChIP-Seq	Homo sapiens	43387
GSM1782701	GSE70482	K562	bone marrow	Nat Methods	26280331	Christoph Bock	2015-08-17	ChIP-Seq	Homo sapiens	39824
GSM1705253	GSE69647			Cell Stem Cell	26686465	Richard A Young	2015-11-21	ChIP-Seq	Homo sapiens	45948
GSM1705254	GSE69647			Cell Stem Cell	26686465	Richard A Young	2015-11-21	ChIP-Seq	Homo sapiens	47714
GSM1705262	GSE69647			Cell Stem Cell	26686465	Richard A Young	2015-11-21	ChIP-Seq	Homo sapiens	26832
GSM1705263	GSE69647			Cell Stem Cell	26686465	Richard A Young	2015-11-21	ChIP-Seq	Homo sapiens	29397
GSM1714039	GSE69962	THP-1	blood	Nucleic Acids Res	26715761;27569350	Carsten Carlberg	2016-01-02	ChIP-Seq	Homo sapiens	12332
GSM1714040	GSE69962	THP-1	blood	Nucleic Acids Res	26715761;27569350	Carsten Carlberg	2016-01-02	ChIP-Seq	Homo sapiens	15782
GSM1936635	GSE74850			EMBO J	26711177	David Sturgill	2016-01-04	ChIP-Seq	Homo sapiens	13064
GSM1936636	GSE74850			EMBO J	26711177	David Sturgill	2016-01-04	ChIP-Seq	Homo sapiens	25807
GSM2038347	GSE76815	SK-N-SH	brain			Quan Xu	2016-01-13	ChIP-Seq	Homo sapiens	35547
GSM1655735	GSE67893			PLoS One	27219007	Vince Schulz	2016-06-27	ChIP-Seq	Homo sapiens	48887
GSM1655739	GSE67893			PLoS One	27219007	Vince Schulz	2016-06-27	ChIP-Seq	Homo sapiens	59227
GSM2140683	GSE67893	Th1	blood	PLoS One	27219007	Vince Schulz	2016-06-27	ChIP-Seq	Homo sapiens	107499
GSM2140685	GSE67893	Th1	blood	PLoS One	27219007	Vince Schulz	2016-06-27	ChIP-Seq	Homo sapiens	43232
GSM1939276	GSE74967			Cell Stem Cell	27476965	Akira Watanabe	2016-07-27	ChIP-Seq	Homo sapiens	25779
GSM2267289	GSE85453	SK-OV-3	ovary			Bo Zhu	2016-09-01	ChIP-Seq	Homo sapiens	224
GSM2067524	GSE78113	MCF7	breast	EMBO Rep	27506891	James Platt	2016-09-14	ChIP-Seq	Homo sapiens	62502
GSM2067525	GSE78113	MCF7	breast	EMBO Rep	27506891	James Platt	2016-09-14	ChIP-Seq	Homo sapiens	50255
GSM2067526	GSE78113	MCF7	breast	EMBO Rep	27506891	James Platt	2016-09-14	ChIP-Seq	Homo sapiens	56394
GSM2067527	GSE78113	MCF7	breast	EMBO Rep	27506891	James Platt	2016-09-14	ChIP-Seq	Homo sapiens	58108
GSM2067536	GSE78113			EMBO Rep	27506891	James Platt	2016-09-14	ChIP-Seq	Homo sapiens	90580
GSM2067537	GSE78113			EMBO Rep	27506891	James Platt	2016-09-14	ChIP-Seq	Homo sapiens	67680
GSM2235690	GSE84432	VCaP	prostate	Sci Rep	27641228	Sari Toropainen	2016-10-06	ChIP-Seq	Homo sapiens	34517
GSM2235691	GSE84432	VCaP	prostate	Sci Rep	27641228	Sari Toropainen	2016-10-06	ChIP-Seq	Homo sapiens	31991
GSM2235692	GSE84432	VCaP	prostate	Sci Rep	27641228	Sari Toropainen	2016-10-06	ChIP-Seq	Homo sapiens	36792
GSM2235693	GSE84432	VCaP	prostate	Sci Rep	27641228	Sari Toropainen	2016-10-06	ChIP-Seq	Homo sapiens	33940
GSM2026780	GSE76496	HEK293	kidney	Genome Res	27852650	Hamed S Najafabadi	2016-10-25	ChIP-Seq	Homo sapiens	4390
GSM2026781	GSE76496	HEK293	kidney	Genome Res	27852650	Hamed S Najafabadi	2016-10-25	ChIP-Seq	Homo sapiens	82792
GSM2026782	GSE76496	HEK293	kidney	Genome Res	27852650	Hamed S Najafabadi	2016-10-25	ChIP-Seq	Homo sapiens	35248
GSM2026783	GSE76496	HEK293	kidney	Genome Res	27852650	Hamed S Najafabadi	2016-10-25	ChIP-Seq	Homo sapiens	7581
GSM2026784	GSE76496	HEK293	kidney	Genome Res	27852650	Hamed S Najafabadi	2016-10-25	ChIP-Seq	Homo sapiens	240
GSM2026785	GSE76496	HEK293	kidney	Genome Res	27852650	Hamed S Najafabadi	2016-10-25	ChIP-Seq	Homo sapiens	42998
GSM2026786	GSE76496	HEK293	kidney	Genome Res	27852650	Hamed S Najafabadi	2016-10-25	ChIP-Seq	Homo sapiens	45739
GSM2341639	GSE87831	U2OS	bone	Genes Dev	27807035	Christopher Benner	2016-11-15	ChIP-Seq	Homo sapiens	24505
GSM2257816	GSE85108	MCF7	breast	Nucleic Acids Res	27638884	Elisa Fiorito	2016-12-10	ChIP-Seq	Homo sapiens	4952
GSM2257817	GSE85108	MCF7	breast	Nucleic Acids Res	27638884	Elisa Fiorito	2016-12-10	ChIP-Seq	Homo sapiens	4169
GSM2257818	GSE85108	MCF7	breast	Nucleic Acids Res	27638884	Elisa Fiorito	2016-12-10	ChIP-Seq	Homo sapiens	64
GSM2178295	GSE81945	COLO829	skin	Cell Rep	27974201	Rebecca C Poulos	2016-12-13	ChIP-Seq	Homo sapiens	49759
GSM2178296	GSE81945	COLO829	skin	Cell Rep	27974201	Rebecca C Poulos	2016-12-13	ChIP-Seq	Homo sapiens	55679
GSM2439223	GSE92879	K562	bone marrow	Cell Rep	29641996	Richard A Young	2016-12-24	ChIP-Seq	Homo sapiens	28863
GSM2439225	GSE92879	K562	bone marrow	Cell Rep	29641996	Richard A Young	2016-12-24	ChIP-Seq	Homo sapiens	26050
GSM2439226	GSE92879	HCT116	colon	Cell Rep	29641996	Richard A Young	2016-12-24	ChIP-Seq	Homo sapiens	28322
GSM2437717	GSE92782	A549	lung	Nature	22955616	ENCODE DCC	2017-01-10	ChIP-Seq	Homo sapiens	35940
GSM2437718	GSE92782	A549	lung	Nature	22955616	ENCODE DCC	2017-01-10	ChIP-Seq	Homo sapiens	35865
GSM2437719	GSE92782	A549	lung	Nature	22955616	ENCODE DCC	2017-01-10	ChIP-Seq	Homo sapiens	37291
GSM2437728	GSE92786	A549	lung	Nature	22955616	ENCODE DCC	2017-01-10	ChIP-Seq	Homo sapiens	35968
GSM2437729	GSE92786	A549	lung	Nature	22955616	ENCODE DCC	2017-01-10	ChIP-Seq	Homo sapiens	23881
GSM2437730	GSE92786	A549	lung	Nature	22955616	ENCODE DCC	2017-01-10	ChIP-Seq	Homo sapiens	37915
GSM2437737	GSE92789	A549	lung	Nature	22955616	ENCODE DCC	2017-01-10	ChIP-Seq	Homo sapiens	41545
GSM2437738	GSE92789	A549	lung	Nature	22955616	ENCODE DCC	2017-01-10	ChIP-Seq	Homo sapiens	32628
GSM2437739	GSE92789	A549	lung	Nature	22955616	ENCODE DCC	2017-01-10	ChIP-Seq	Homo sapiens	35449
GSM2437756	GSE92794	A549	lung	Nature	22955616	ENCODE DCC	2017-01-10	ChIP-Seq	Homo sapiens	34169
GSM2437757	GSE92794	A549	lung	Nature	22955616	ENCODE DCC	2017-01-10	ChIP-Seq	Homo sapiens	42988
GSM2437758	GSE92794	A549	lung	Nature	22955616	ENCODE DCC	2017-01-10	ChIP-Seq	Homo sapiens	43567
GSM2437764	GSE92797	A549	lung	Nature	22955616	ENCODE DCC	2017-01-10	ChIP-Seq	Homo sapiens	37048
GSM2437765	GSE92797	A549	lung	Nature	22955616	ENCODE DCC	2017-01-10	ChIP-Seq	Homo sapiens	43835
GSM2437771	GSE92800	A549	lung	Nature	22955616	ENCODE DCC	2017-01-10	ChIP-Seq	Homo sapiens	41736
GSM2437772	GSE92800	A549	lung	Nature	22955616	ENCODE DCC	2017-01-10	ChIP-Seq	Homo sapiens	33099
GSM2437773	GSE92800	A549	lung	Nature	22955616	ENCODE DCC	2017-01-10	ChIP-Seq	Homo sapiens	50037
GSM2437780	GSE92803	A549	lung	Nature	22955616	ENCODE DCC	2017-01-10	ChIP-Seq	Homo sapiens	26945
GSM2437781	GSE92803	A549	lung	Nature	22955616	ENCODE DCC	2017-01-10	ChIP-Seq	Homo sapiens	38402
GSM2437782	GSE92803	A549	lung	Nature	22955616	ENCODE DCC	2017-01-10	ChIP-Seq	Homo sapiens	35290
GSM2437791	GSE92805	A549	lung	Nature	22955616	ENCODE DCC	2017-01-10	ChIP-Seq	Homo sapiens	40496
GSM2437792	GSE92805	A549	lung	Nature	22955616	ENCODE DCC	2017-01-10	ChIP-Seq	Homo sapiens	39905
GSM2437793	GSE92805	A549	lung	Nature	22955616	ENCODE DCC	2017-01-10	ChIP-Seq	Homo sapiens	37938
GSM2437798	GSE92808	A549	lung	Nature	22955616	ENCODE DCC	2017-01-10	ChIP-Seq	Homo sapiens	37777
GSM2437799	GSE92808	A549	lung	Nature	22955616	ENCODE DCC	2017-01-10	ChIP-Seq	Homo sapiens	27256
GSM2437800	GSE92808	A549	lung	Nature	22955616	ENCODE DCC	2017-01-10	ChIP-Seq	Homo sapiens	36711
GSM2437819	GSE92814	A549	lung	Nature	22955616	ENCODE DCC	2017-01-10	ChIP-Seq	Homo sapiens	45140
GSM2437820	GSE92814	A549	lung	Nature	22955616	ENCODE DCC	2017-01-10	ChIP-Seq	Homo sapiens	34629
GSM2437821	GSE92814	A549	lung	Nature	22955616	ENCODE DCC	2017-01-10	ChIP-Seq	Homo sapiens	36149
GSM2437875	GSE92830	A549	lung	Nature	22955616	ENCODE DCC	2017-01-10	ChIP-Seq	Homo sapiens	31246
GSM2437876	GSE92830	A549	lung	Nature	22955616	ENCODE DCC	2017-01-10	ChIP-Seq	Homo sapiens	38793
GSM2437877	GSE92830	A549	lung	Nature	22955616	ENCODE DCC	2017-01-10	ChIP-Seq	Homo sapiens	34866
GSM2437881	GSE92832	A549	lung	Nature	22955616	ENCODE DCC	2017-01-10	ChIP-Seq	Homo sapiens	46451
GSM2437882	GSE92832	A549	lung	Nature	22955616	ENCODE DCC	2017-01-10	ChIP-Seq	Homo sapiens	39181
GSM2437883	GSE92832	A549	lung	Nature	22955616	ENCODE DCC	2017-01-10	ChIP-Seq	Homo sapiens	40591
GSM2534220	GSE96269			Nature	22955616	ENCODE DCC	2017-03-12	ChIP-Seq	Homo sapiens	71478
GSM2534221	GSE96269			Nature	22955616	ENCODE DCC	2017-03-12	ChIP-Seq	Homo sapiens	55083
GSM2534649	GSE96477			Nature	22955616	ENCODE DCC	2017-03-12	ChIP-Seq	Homo sapiens	104343
GSM2534650	GSE96477			Nature	22955616	ENCODE DCC	2017-03-12	ChIP-Seq	Homo sapiens	98034
GSM2544244	GSE96800	THP-1	blood	Mol Cell	28890333	Kevin Van Bortle	2017-03-29	ChIP-Seq	Homo sapiens	43016
GSM2544245	GSE96800	THP-1	blood	Mol Cell	28890333	Kevin Van Bortle	2017-03-29	ChIP-Seq	Homo sapiens	48582
GSM2544246	GSE96800	THP-1	blood	Mol Cell	28890333	Kevin Van Bortle	2017-03-29	ChIP-Seq	Homo sapiens	40208
GSM2544247	GSE96800	THP-1	blood	Mol Cell	28890333	Kevin Van Bortle	2017-03-29	ChIP-Seq	Homo sapiens	44113
GSM2214099	GSE83728			Cancer Discov	28446439	Javed Khan	2017-04-27	ChIP-Seq	Homo sapiens	64927
GSM2214100	GSE83728			Cancer Discov	28446439	Javed Khan	2017-04-27	ChIP-Seq	Homo sapiens	67579
GSM2316303	GSE87064			Neuron	28472656;29514090	Beisi Xu	2017-05-03	ChIP-Seq	Homo sapiens	31599
GSM2316304	GSE87064			Neuron	28472656;29514090	Beisi Xu	2017-05-03	ChIP-Seq	Homo sapiens	35140
GSM2316305	GSE87064			Neuron	28472656;29514090	Beisi Xu	2017-05-03	ChIP-Seq	Homo sapiens	20784
GSM2316306	GSE87064			Neuron	28472656;29514090	Beisi Xu	2017-05-03	ChIP-Seq	Homo sapiens	29649
GSM2316307	GSE87064			Neuron	28472656;29514090	Beisi Xu	2017-05-03	ChIP-Seq	Homo sapiens	24608
GSM2316308	GSE87064			Neuron	28472656;29514090	Beisi Xu	2017-05-03	ChIP-Seq	Homo sapiens	19193
GSM2493878	GSE95015	HAP-1	blood	Cell	28475897	Robin H. van der Weide	2017-05-03	ChIP-Seq	Homo sapiens	38738
GSM2493879	GSE95015	HAP-1	blood	Cell	28475897	Robin H. van der Weide	2017-05-03	ChIP-Seq	Homo sapiens	41449
GSM2493880	GSE95015	HAP-1	blood	Cell	28475897	Robin H. van der Weide	2017-05-03	ChIP-Seq	Homo sapiens	34158
GSM2493881	GSE95015	HAP-1	blood	Cell	28475897	Robin H. van der Weide	2017-05-03	ChIP-Seq	Homo sapiens	42343
GSM2599084	GSE98551	MCF10A	breast	J Cell Physiol	28504305	Joe R Boyd	2017-05-23	ChIP-Seq	Homo sapiens	43043
GSM2599085	GSE98551	MCF10A	breast	J Cell Physiol	28504305	Joe R Boyd	2017-05-23	ChIP-Seq	Homo sapiens	53407
GSM2599086	GSE98551	MCF10A	breast	J Cell Physiol	28504305	Joe R Boyd	2017-05-23	ChIP-Seq	Homo sapiens	32157
GSM2599087	GSE98551	MCF10A	breast	J Cell Physiol	28504305	Joe R Boyd	2017-05-23	ChIP-Seq	Homo sapiens	51740
GSM2599088	GSE98551		breast	J Cell Physiol	28504305	Joe R Boyd	2017-05-23	ChIP-Seq	Homo sapiens	37485
GSM2599089	GSE98551		breast	J Cell Physiol	28504305	Joe R Boyd	2017-05-23	ChIP-Seq	Homo sapiens	41938
GSM2247247	GSE84657			Nat Genet	28805829	Paul Khavari	2017-06-28	ChIP-Seq	Homo sapiens	62878
GSM2247248	GSE84657			Nat Genet	28805829	Paul Khavari	2017-06-28	ChIP-Seq	Homo sapiens	40193
GSM2247249	GSE84657			Nat Genet	28805829	Paul Khavari	2017-06-28	ChIP-Seq	Homo sapiens	45711
GSM2698420	GSE100977	OCI-LY7	blood	Nature	22955616	ENCODE DCC	2017-07-10	ChIP-Seq	Homo sapiens	53653
GSM2698421	GSE100977	OCI-LY7	blood	Nature	22955616	ENCODE DCC	2017-07-10	ChIP-Seq	Homo sapiens	54271
GSM2698544	GSE100991			Nature	22955616	ENCODE DCC	2017-07-10	ChIP-Seq	Homo sapiens	68385
GSM2698545	GSE100991			Nature	22955616	ENCODE DCC	2017-07-10	ChIP-Seq	Homo sapiens	65044
GSM2698608	GSE101017	DOHH2	blood	Nature	22955616	ENCODE DCC	2017-07-10	ChIP-Seq	Homo sapiens	55500
GSM2698609	GSE101017	DOHH2	blood	Nature	22955616	ENCODE DCC	2017-07-10	ChIP-Seq	Homo sapiens	44857
GSM2698705	GSE101051	PC9	lung	Nature	22955616	ENCODE DCC	2017-07-10	ChIP-Seq	Homo sapiens	49704
GSM2698706	GSE101051	PC9	lung	Nature	22955616	ENCODE DCC	2017-07-10	ChIP-Seq	Homo sapiens	35370
GSM2699127	GSE101095	MM.1S	blood	Nature	22955616	ENCODE DCC	2017-07-12	ChIP-Seq	Homo sapiens	47645
GSM2699128	GSE101095	MM.1S	blood	Nature	22955616	ENCODE DCC	2017-07-12	ChIP-Seq	Homo sapiens	43998
GSM2699183	GSE101103			Nature	22955616	ENCODE DCC	2017-07-12	ChIP-Seq	Homo sapiens	27795
GSM2699184	GSE101103			Nature	22955616	ENCODE DCC	2017-07-12	ChIP-Seq	Homo sapiens	43276
GSM2699185	GSE101103			Nature	22955616	ENCODE DCC	2017-07-12	ChIP-Seq	Homo sapiens	45448
GSM2700610	GSE101279			Nature	22955616	ENCODE DCC	2017-07-12	ChIP-Seq	Homo sapiens	25582
GSM2700611	GSE101279			Nature	22955616	ENCODE DCC	2017-07-12	ChIP-Seq	Homo sapiens	18431
GSM2410500	GSE90691	K562	bone marrow	Nat Commun	28695892	Jianzhong Su	2017-08-11	ChIP-Seq	Homo sapiens	2487
GSM2410501	GSE90691	K562	bone marrow	Nat Commun	28695892	Jianzhong Su	2017-08-11	ChIP-Seq	Homo sapiens	1125
GSM2410502	GSE90691	K562	bone marrow	Nat Commun	28695892	Jianzhong Su	2017-08-11	ChIP-Seq	Homo sapiens	3586
GSM2410503	GSE90691	K562	bone marrow	Nat Commun	28695892	Jianzhong Su	2017-08-11	ChIP-Seq	Homo sapiens	1300
GSM2410504	GSE90691	K562	bone marrow	Nat Commun	28695892	Jianzhong Su	2017-08-11	ChIP-Seq	Homo sapiens	4921
GSM2410505	GSE90691	K562	bone marrow	Nat Commun	28695892	Jianzhong Su	2017-08-11	ChIP-Seq	Homo sapiens	561
GSM2731525	GSE102237					Vladimir B Teif	2017-08-11	ChIP-Seq	Homo sapiens	433
GSM2731526	GSE102237					Vladimir B Teif	2017-08-11	ChIP-Seq	Homo sapiens	1093
GSM2731531	GSE102237					Vladimir B Teif	2017-08-11	ChIP-Seq	Homo sapiens	217
GSM2731532	GSE102237					Vladimir B Teif	2017-08-11	ChIP-Seq	Homo sapiens	284
GSM2747717	GSE102882	MCF7	breast	Nucleic Acids Res	29672735	Andrew Nicholas Holding	2017-08-22	ChIP-Seq	Homo sapiens	54570
GSM2747727	GSE102882	MCF7	breast	Nucleic Acids Res	29672735	Andrew Nicholas Holding	2017-08-22	ChIP-Seq	Homo sapiens	61903
GSM2040764	GSE76922	GM12878	blood	Nat Commun	30559385	Alexander Eckehart Urban	2017-09-05	ChIP-Seq	Homo sapiens	52394
GSM2040765	GSE76922	GM12878	blood	Nat Commun	30559385	Alexander Eckehart Urban	2017-09-05	ChIP-Seq	Homo sapiens	55046
GSM2040766	GSE76922			Nat Commun	30559385	Alexander Eckehart Urban	2017-09-05	ChIP-Seq	Homo sapiens	63959
GSM2040767	GSE76922			Nat Commun	30559385	Alexander Eckehart Urban	2017-09-05	ChIP-Seq	Homo sapiens	56769
GSM2040768	GSE76922			Nat Commun	30559385	Alexander Eckehart Urban	2017-09-05	ChIP-Seq	Homo sapiens	65345
GSM2040769	GSE76922			Nat Commun	30559385	Alexander Eckehart Urban	2017-09-05	ChIP-Seq	Homo sapiens	28958
GSM2040770	GSE76922			Nat Commun	30559385	Alexander Eckehart Urban	2017-09-05	ChIP-Seq	Homo sapiens	60387
GSM2730053	GSE102201		liver	Genes Dev	28916711	Peng Huang	2017-09-18	ChIP-Seq	Homo sapiens	34435
GSM2730054	GSE102201		liver	Genes Dev	28916711	Peng Huang	2017-09-18	ChIP-Seq	Homo sapiens	53753
GSM2730056	GSE102201			Genes Dev	28916711	Peng Huang	2017-09-18	ChIP-Seq	Homo sapiens	55688
GSM2730057	GSE102201			Genes Dev	28916711	Peng Huang	2017-09-18	ChIP-Seq	Homo sapiens	54953
GSM2809613	GSE104334	HCT116	colon	Cell	28985562	Suhas Rao	2017-10-05	ChIP-Seq	Homo sapiens	27786
GSM2809614	GSE104334	HCT116	colon	Cell	28985562	Suhas Rao	2017-10-05	ChIP-Seq	Homo sapiens	22918
GSM2809615	GSE104334	HCT116	colon	Cell	28985562	Suhas Rao	2017-10-05	ChIP-Seq	Homo sapiens	54278
GSM2809616	GSE104334	HCT116	colon	Cell	28985562	Suhas Rao	2017-10-05	ChIP-Seq	Homo sapiens	40145
GSM2824328	GSE105179			Nature	22955616	ENCODE DCC	2017-10-20	ChIP-Seq	Homo sapiens	39101
GSM2824351	GSE105186			Nature	22955616	ENCODE DCC	2017-10-20	ChIP-Seq	Homo sapiens	697
GSM2824375	GSE105198			Nature	22955616	ENCODE DCC	2017-10-20	ChIP-Seq	Homo sapiens	37982
GSM2825069	GSE105222			Nature	22955616	ENCODE DCC	2017-10-20	ChIP-Seq	Homo sapiens	31940
GSM2825085	GSE105227			Nature	22955616	ENCODE DCC	2017-10-20	ChIP-Seq	Homo sapiens	26183
GSM2825118	GSE105244			Nature	22955616	ENCODE DCC	2017-10-20	ChIP-Seq	Homo sapiens	5632
GSM2825136	GSE105250		lung	Nature	22955616	ENCODE DCC	2017-10-20	ChIP-Seq	Homo sapiens	56441
GSM2825289	GSE105263			Nature	22955616	ENCODE DCC	2017-10-20	ChIP-Seq	Homo sapiens	67463
GSM2825406	GSE105270		colon	Nature	22955616	ENCODE DCC	2017-10-20	ChIP-Seq	Homo sapiens	52254
GSM2825424	GSE105284			Nature	22955616	ENCODE DCC	2017-10-20	ChIP-Seq	Homo sapiens	5546
GSM2825441	GSE105295	Panc1	pancreas	Nature	22955616	ENCODE DCC	2017-10-20	ChIP-Seq	Homo sapiens	56346
GSM2825442	GSE105295	Panc1	pancreas	Nature	22955616	ENCODE DCC	2017-10-20	ChIP-Seq	Homo sapiens	58344
GSM2825505	GSE105339		colon	Nature	22955616	ENCODE DCC	2017-10-20	ChIP-Seq	Homo sapiens	37922
GSM2825521	GSE105350			Nature	22955616	ENCODE DCC	2017-10-20	ChIP-Seq	Homo sapiens	11810
GSM2825527	GSE105355			Nature	22955616	ENCODE DCC	2017-10-20	ChIP-Seq	Homo sapiens	52548
GSM2825544	GSE105365			Nature	22955616	ENCODE DCC	2017-10-20	ChIP-Seq	Homo sapiens	18869
GSM2825554	GSE105372			Nature	22955616	ENCODE DCC	2017-10-20	ChIP-Seq	Homo sapiens	43118
GSM2825573	GSE105383		prostate	Nature	22955616	ENCODE DCC	2017-10-20	ChIP-Seq	Homo sapiens	65580
GSM2825574	GSE105383		prostate	Nature	22955616	ENCODE DCC	2017-10-20	ChIP-Seq	Homo sapiens	51226
GSM2825588	GSE105391			Nature	22955616	ENCODE DCC	2017-10-20	ChIP-Seq	Homo sapiens	21556
GSM2825674	GSE105403	VCaP	prostate	Nature	22955616	ENCODE DCC	2017-10-20	ChIP-Seq	Homo sapiens	42017
GSM2825675	GSE105403	VCaP	prostate	Nature	22955616	ENCODE DCC	2017-10-20	ChIP-Seq	Homo sapiens	52265
GSM2825676	GSE105404		pancreas	Nature	22955616	ENCODE DCC	2017-10-20	ChIP-Seq	Homo sapiens	57044
GSM2827130	GSE105467		pancreas	Nature	22955616	ENCODE DCC	2017-10-23	ChIP-Seq	Homo sapiens	58508
GSM2827131	GSE105468	RWPE1	prostate	Nature	22955616	ENCODE DCC	2017-10-23	ChIP-Seq	Homo sapiens	23579
GSM2827132	GSE105468	RWPE1	prostate	Nature	22955616	ENCODE DCC	2017-10-23	ChIP-Seq	Homo sapiens	33484
GSM2827153	GSE105472		breast	Nature	22955616	ENCODE DCC	2017-10-23	ChIP-Seq	Homo sapiens	15530
GSM2827160	GSE105476		pancreas	Nature	22955616	ENCODE DCC	2017-10-23	ChIP-Seq	Homo sapiens	76493
GSM2827161	GSE105477			Nature	22955616	ENCODE DCC	2017-10-23	ChIP-Seq	Homo sapiens	27869
GSM2827202	GSE105500	LNCaP	prostate	Nature	22955616	ENCODE DCC	2017-10-23	ChIP-Seq	Homo sapiens	54582
GSM2827203	GSE105500	LNCaP	prostate	Nature	22955616	ENCODE DCC	2017-10-23	ChIP-Seq	Homo sapiens	34919
GSM2827216	GSE105507			Nature	22955616	ENCODE DCC	2017-10-23	ChIP-Seq	Homo sapiens	1363
GSM2827222	GSE105510			Nature	22955616	ENCODE DCC	2017-10-23	ChIP-Seq	Homo sapiens	50392
GSM2827224	GSE105512		colon	Nature	22955616	ENCODE DCC	2017-10-23	ChIP-Seq	Homo sapiens	9621
GSM2827238	GSE105519			Nature	22955616	ENCODE DCC	2017-10-23	ChIP-Seq	Homo sapiens	36968
GSM2827263	GSE105535			Nature	22955616	ENCODE DCC	2017-10-23	ChIP-Seq	Homo sapiens	1293
GSM2827277	GSE105543		colon	Nature	22955616	ENCODE DCC	2017-10-23	ChIP-Seq	Homo sapiens	21289
GSM2827293	GSE105554			Nature	22955616	ENCODE DCC	2017-10-23	ChIP-Seq	Homo sapiens	44255
GSM2827319	GSE105569			Nature	22955616	ENCODE DCC	2017-10-23	ChIP-Seq	Homo sapiens	39620
GSM2827328	GSE105575			Nature	22955616	ENCODE DCC	2017-10-23	ChIP-Seq	Homo sapiens	17388
GSM2827359	GSE105594			Nature	22955616	ENCODE DCC	2017-10-23	ChIP-Seq	Homo sapiens	61699
GSM2827381	GSE105608		breast	Nature	22955616	ENCODE DCC	2017-10-23	ChIP-Seq	Homo sapiens	34789
GSM2827382	GSE105609			Nature	22955616	ENCODE DCC	2017-10-23	ChIP-Seq	Homo sapiens	36244
GSM2827383	GSE105610			Nature	22955616	ENCODE DCC	2017-10-23	ChIP-Seq	Homo sapiens	67329
GSM2827389	GSE105614			Nature	22955616	ENCODE DCC	2017-10-23	ChIP-Seq	Homo sapiens	62802
GSM2827409	GSE105628	C4-2B	prostate	Nature	22955616	ENCODE DCC	2017-10-23	ChIP-Seq	Homo sapiens	54456
GSM2827410	GSE105628	C4-2B	prostate	Nature	22955616	ENCODE DCC	2017-10-23	ChIP-Seq	Homo sapiens	62070
GSM2827411	GSE105629			Nature	22955616	ENCODE DCC	2017-10-23	ChIP-Seq	Homo sapiens	21649
GSM2827412	GSE105630			Nature	22955616	ENCODE DCC	2017-10-23	ChIP-Seq	Homo sapiens	43634
GSM2827438	GSE105648	LNCaP	prostate	Nature	22955616	ENCODE DCC	2017-10-23	ChIP-Seq	Homo sapiens	48760
GSM2827439	GSE105648	LNCaP	prostate	Nature	22955616	ENCODE DCC	2017-10-23	ChIP-Seq	Homo sapiens	80965
GSM2827473	GSE105670			Nature	22955616	ENCODE DCC	2017-10-23	ChIP-Seq	Homo sapiens	44210
GSM2827505	GSE105690			Nature	22955616	ENCODE DCC	2017-10-23	ChIP-Seq	Homo sapiens	41074
GSM2827510	GSE105693			Nature	22955616	ENCODE DCC	2017-10-23	ChIP-Seq	Homo sapiens	27951
GSM2827512	GSE105695			Nature	22955616	ENCODE DCC	2017-10-23	ChIP-Seq	Homo sapiens	31647
GSM2827524	GSE105703			Nature	22955616	ENCODE DCC	2017-10-23	ChIP-Seq	Homo sapiens	22637
GSM2827526	GSE105705		breast	Nature	22955616	ENCODE DCC	2017-10-23	ChIP-Seq	Homo sapiens	39239
GSM2827529	GSE105707			Nature	22955616	ENCODE DCC	2017-10-23	ChIP-Seq	Homo sapiens	45249
GSM2827540	GSE105714		pancreas	Nature	22955616	ENCODE DCC	2017-10-23	ChIP-Seq	Homo sapiens	45786
GSM2827542	GSE105716		colon	Nature	22955616	ENCODE DCC	2017-10-23	ChIP-Seq	Homo sapiens	4242
GSM2827544	GSE105718			Nature	22955616	ENCODE DCC	2017-10-23	ChIP-Seq	Homo sapiens	34269
GSM2827572	GSE105736			Nature	22955616	ENCODE DCC	2017-10-23	ChIP-Seq	Homo sapiens	46906
GSM2827573	GSE105737			Nature	22955616	ENCODE DCC	2017-10-23	ChIP-Seq	Homo sapiens	28995
GSM2827575	GSE105739			Nature	22955616	ENCODE DCC	2017-10-23	ChIP-Seq	Homo sapiens	26509
GSM2827589	GSE105749			Nature	22955616	ENCODE DCC	2017-10-23	ChIP-Seq	Homo sapiens	4151
GSM2828488	GSE105829		liver	Nature	22955616	ENCODE DCC	2017-10-24	ChIP-Seq	Homo sapiens	44417
GSM2828516	GSE105848		prostate	Nature	22955616	ENCODE DCC	2017-10-24	ChIP-Seq	Homo sapiens	49296
GSM2828521	GSE105852		colon	Nature	22955616	ENCODE DCC	2017-10-24	ChIP-Seq	Homo sapiens	27383
GSM2828547	GSE105869			Nature	22955616	ENCODE DCC	2017-10-24	ChIP-Seq	Homo sapiens	777
GSM2828550	GSE105871			Nature	22955616	ENCODE DCC	2017-10-24	ChIP-Seq	Homo sapiens	51895
GSM2828560	GSE105879		colon	Nature	22955616	ENCODE DCC	2017-10-24	ChIP-Seq	Homo sapiens	20094
GSM2828639	GSE105894		prostate	Nature	22955616	ENCODE DCC	2017-10-24	ChIP-Seq	Homo sapiens	50096
GSM2828689	GSE105911		colon	Nature	22955616	ENCODE DCC	2017-10-24	ChIP-Seq	Homo sapiens	46577
GSM2828709	GSE105921			Nature	22955616	ENCODE DCC	2017-10-24	ChIP-Seq	Homo sapiens	60667
GSM2828714	GSE105925			Nature	22955616	ENCODE DCC	2017-10-24	ChIP-Seq	Homo sapiens	28969
GSM2828718	GSE105928		lung	Nature	22955616	ENCODE DCC	2017-10-24	ChIP-Seq	Homo sapiens	46959
GSM2828722	GSE105931			Nature	22955616	ENCODE DCC	2017-10-24	ChIP-Seq	Homo sapiens	39003
GSM2828799	GSE105947		lung	Nature	22955616	ENCODE DCC	2017-10-24	ChIP-Seq	Homo sapiens	33135
GSM2828802	GSE105949		lung	Nature	22955616	ENCODE DCC	2017-10-24	ChIP-Seq	Homo sapiens	47042
GSM2828820	GSE105953			Nature	22955616	ENCODE DCC	2017-10-24	ChIP-Seq	Homo sapiens	34351
GSM2828838	GSE105966	22Rv1	prostate	Nature	22955616	ENCODE DCC	2017-10-24	ChIP-Seq	Homo sapiens	50466
GSM2828839	GSE105966	22Rv1	prostate	Nature	22955616	ENCODE DCC	2017-10-24	ChIP-Seq	Homo sapiens	35829
GSM2828855	GSE105976			Nature	22955616	ENCODE DCC	2017-10-24	ChIP-Seq	Homo sapiens	27437
GSM2828864	GSE105982	22Rv1	prostate	Nature	22955616	ENCODE DCC	2017-10-24	ChIP-Seq	Homo sapiens	46030
GSM2828865	GSE105982	22Rv1	prostate	Nature	22955616	ENCODE DCC	2017-10-24	ChIP-Seq	Homo sapiens	49200
GSM2828871	GSE105986			Nature	22955616	ENCODE DCC	2017-10-24	ChIP-Seq	Homo sapiens	40791
GSM2828883	GSE105994			Nature	22955616	ENCODE DCC	2017-10-24	ChIP-Seq	Homo sapiens	210
GSM2828900	GSE106004		colon	Nature	22955616	ENCODE DCC	2017-10-24	ChIP-Seq	Homo sapiens	34728
GSM2828902	GSE106006			Nature	22955616	ENCODE DCC	2017-10-24	ChIP-Seq	Homo sapiens	57590
GSM2828903	GSE106007			Nature	22955616	ENCODE DCC	2017-10-24	ChIP-Seq	Homo sapiens	40560
GSM2828911	GSE106013			Nature	22955616	ENCODE DCC	2017-10-24	ChIP-Seq	Homo sapiens	23263
GSM2828921	GSE106021			Nature	22955616	ENCODE DCC	2017-10-24	ChIP-Seq	Homo sapiens	436
GSM2828975	GSE106055			Nature	22955616	ENCODE DCC	2017-10-25	ChIP-Seq	Homo sapiens	4780
GSM2828982	GSE106060			Nature	22955616	ENCODE DCC	2017-10-25	ChIP-Seq	Homo sapiens	40981
GSM2828983	GSE106061			Nature	22955616	ENCODE DCC	2017-10-25	ChIP-Seq	Homo sapiens	60388
GSM2828999	GSE106071			Nature	22955616	ENCODE DCC	2017-10-25	ChIP-Seq	Homo sapiens	43719
GSM2777336	GSE103651	293T	kidney	Cell Res	29076501	Zhang Mo	2017-10-30	ChIP-Seq	Homo sapiens	64
GSM2842800	GSE94488			Mol Cell	29149598	Emily Bernstein	2017-11-16	ChIP-Seq	Homo sapiens	47142
GSM2861703	GSE104579					Jianzhong Su	2017-11-24	ChIP-Seq	Homo sapiens	28151
GSM2747764	GSE102884	HeLa	cervix	EMBO J	29217591	Roman R Stocsits	2017-12-07	ChIP-Seq	Homo sapiens	42650
GSM2747765	GSE102884	HeLa	cervix	EMBO J	29217591	Roman R Stocsits	2017-12-07	ChIP-Seq	Homo sapiens	54673
GSM2747766	GSE102884	HeLa	cervix	EMBO J	29217591	Roman R Stocsits	2017-12-07	ChIP-Seq	Homo sapiens	52657
GSM2747767	GSE102884	HeLa	cervix	EMBO J	29217591	Roman R Stocsits	2017-12-07	ChIP-Seq	Homo sapiens	51687
GSM2877982	GSE107749	MCF7	breast	Nucleic Acids Res	29672735	Andrew Nicholas Holding	2017-12-07	ChIP-Seq	Homo sapiens	79402
GSM2877993	GSE107749	MCF7	breast	Nucleic Acids Res	29672735	Andrew Nicholas Holding	2017-12-07	ChIP-Seq	Homo sapiens	99702
GSM2759386	GSE78957			Cell Rep	29262328	Martin Eilers	2017-12-20	ChIP-Seq	Homo sapiens	44770
GSM2870996	GSE101297	SH-SY5Y	bone marrow	Cancer Discov	29284669	Richard A Young	2017-12-22	ChIP-Seq	Homo sapiens	54891
GSM2870998	GSE101297			Cancer Discov	29284669	Richard A Young	2017-12-22	ChIP-Seq	Homo sapiens	60198
GSM2871000	GSE101297			Cancer Discov	29284669	Richard A Young	2017-12-22	ChIP-Seq	Homo sapiens	72737
GSM2572332	GSE80150			Nat Genet	29379199	James Bradner	2018-01-30	ChIP-Seq	Homo sapiens	19950
GSM2572335	GSE80150			Nat Genet	29379199	James Bradner	2018-01-30	ChIP-Seq	Homo sapiens	21209
GSM2572338	GSE80150			Nat Genet	29379199	James Bradner	2018-01-30	ChIP-Seq	Homo sapiens	24438
GSM1684571	GSE68858	Panc1	pancreas	J Cell Biochem	30548288	Seth Frietze	2018-02-10	ChIP-Seq	Homo sapiens	42265
GSM1684572	GSE68858	Panc1	pancreas	J Cell Biochem	30548288	Seth Frietze	2018-02-10	ChIP-Seq	Homo sapiens	49341
GSM1684573	GSE68858	Panc1	pancreas	J Cell Biochem	30548288	Seth Frietze	2018-02-10	ChIP-Seq	Homo sapiens	45733
GSM1684574	GSE68858	Panc1	pancreas	J Cell Biochem	30548288	Seth Frietze	2018-02-10	ChIP-Seq	Homo sapiens	40816
GSM2948733	GSE109706			Neurobiol Dis	29486295	Gerry A. Coetzee	2018-03-01	ChIP-Seq	Homo sapiens	40212
GSM2948734	GSE109706			Neurobiol Dis	29486295	Gerry A. Coetzee	2018-03-01	ChIP-Seq	Homo sapiens	43781
GSM2948735	GSE109706			Neurobiol Dis	29486295	Gerry A. Coetzee	2018-03-01	ChIP-Seq	Homo sapiens	42913
GSM2948736	GSE109706			Neurobiol Dis	29486295	Gerry A. Coetzee	2018-03-01	ChIP-Seq	Homo sapiens	40072
GSM3019944	GSE111000	HepG2	liver	Commun Biol	30534606	Thomas Manke	2018-03-06	ChIP-Seq	Homo sapiens	9158
GSM2894547	GSE97394			Science	29590048	Chenhuan Xu	2018-03-13	ChIP-Seq	Homo sapiens	24323
GSM2894548	GSE97394			Science	29590048	Chenhuan Xu	2018-03-13	ChIP-Seq	Homo sapiens	29468
GSM3671075	GSE104676			Cell	29606353	Stuart Orkin	2018-03-30	ChIP-Seq	Homo sapiens	49218
GSM2653643	GSE88738			Cell	29706544	Chiara Balestrieri	2018-05-02	ChIP-Seq	Homo sapiens	33043
GSM2872297	GSE107607	HeLa	cervix	Genome Res	29907613	Christian Pflueger	2018-06-05	ChIP-Seq	Homo sapiens	46881
GSM2872298	GSE107607	HeLa	cervix	Genome Res	29907613	Christian Pflueger	2018-06-05	ChIP-Seq	Homo sapiens	60458
GSM2872299	GSE107607	HeLa	cervix	Genome Res	29907613	Christian Pflueger	2018-06-05	ChIP-Seq	Homo sapiens	61263
GSM2872301	GSE107607	HeLa	cervix	Genome Res	29907613	Christian Pflueger	2018-06-05	ChIP-Seq	Homo sapiens	51741
GSM2872302	GSE107607	HeLa	cervix	Genome Res	29907613	Christian Pflueger	2018-06-05	ChIP-Seq	Homo sapiens	56723
GSM2872303	GSE107607	HeLa	cervix	Genome Res	29907613	Christian Pflueger	2018-06-05	ChIP-Seq	Homo sapiens	55263
GSM2872304	GSE107607	HeLa	cervix	Genome Res	29907613	Christian Pflueger	2018-06-05	ChIP-Seq	Homo sapiens	60453
GSM2872305	GSE107607	HeLa	cervix	Genome Res	29907613	Christian Pflueger	2018-06-05	ChIP-Seq	Homo sapiens	55361
GSM2816619	GSE105028	hESC	stem	Mol Cell	30122536	Victor Corces	2018-08-03	ChIP-Seq	Homo sapiens	9891
GSM2816620	GSE105028	hESC	stem	Mol Cell	30122536	Victor Corces	2018-08-03	ChIP-Seq	Homo sapiens	15878
GSM3111899	GSE103477			Cell	30146161	Christopher Benner	2018-08-23	ChIP-Seq	Homo sapiens	28273
GSM3111900	GSE103477			Cell	30146161	Christopher Benner	2018-08-23	ChIP-Seq	Homo sapiens	22953
GSM3111901	GSE103477			Cell	30146161	Christopher Benner	2018-08-23	ChIP-Seq	Homo sapiens	26847
GSM3111902	GSE103477			Cell	30146161	Christopher Benner	2018-08-23	ChIP-Seq	Homo sapiens	25674
GSM3111903	GSE103477			Cell	30146161	Christopher Benner	2018-08-23	ChIP-Seq	Homo sapiens	26771
GSM3111904	GSE103477			Cell	30146161	Christopher Benner	2018-08-23	ChIP-Seq	Homo sapiens	23318
GSM3111905	GSE103477			Cell	30146161	Christopher Benner	2018-08-23	ChIP-Seq	Homo sapiens	26212
GSM3111906	GSE103477			Cell	30146161	Christopher Benner	2018-08-23	ChIP-Seq	Homo sapiens	25708
GSM3111978	GSE103477	THP-1	blood	Cell	30146161	Christopher Benner	2018-08-23	ChIP-Seq	Homo sapiens	41036
GSM3111979	GSE103477	THP-1	blood	Cell	30146161	Christopher Benner	2018-08-23	ChIP-Seq	Homo sapiens	40170
GSM3112024	GSE103477	THP-1	blood	Cell	30146161	Christopher Benner	2018-08-23	ChIP-Seq	Homo sapiens	44118
GSM3112025	GSE103477	THP-1	blood	Cell	30146161	Christopher Benner	2018-08-23	ChIP-Seq	Homo sapiens	43676
GSM3112026	GSE103477	THP-1	blood	Cell	30146161	Christopher Benner	2018-08-23	ChIP-Seq	Homo sapiens	42087
GSM3112027	GSE103477	THP-1	blood	Cell	30146161	Christopher Benner	2018-08-23	ChIP-Seq	Homo sapiens	41895
GSM3112028	GSE103477	THP-1	blood	Cell	30146161	Christopher Benner	2018-08-23	ChIP-Seq	Homo sapiens	35104
GSM3112029	GSE103477	THP-1	blood	Cell	30146161	Christopher Benner	2018-08-23	ChIP-Seq	Homo sapiens	37235
GSM3112030	GSE103477	THP-1	blood	Cell	30146161	Christopher Benner	2018-08-23	ChIP-Seq	Homo sapiens	39274
GSM3112031	GSE103477	THP-1	blood	Cell	30146161	Christopher Benner	2018-08-23	ChIP-Seq	Homo sapiens	43729
GSM3112032	GSE103477	THP-1	blood	Cell	30146161	Christopher Benner	2018-08-23	ChIP-Seq	Homo sapiens	41035
GSM3112033	GSE103477	THP-1	blood	Cell	30146161	Christopher Benner	2018-08-23	ChIP-Seq	Homo sapiens	44590
GSM3112034	GSE103477	THP-1	blood	Cell	30146161	Christopher Benner	2018-08-23	ChIP-Seq	Homo sapiens	38167
GSM3112060	GSE103477	THP-1	blood	Cell	30146161	Christopher Benner	2018-08-23	ChIP-Seq	Homo sapiens	60676
GSM3112061	GSE103477	THP-1	blood	Cell	30146161	Christopher Benner	2018-08-23	ChIP-Seq	Homo sapiens	56920
GSM3112062	GSE103477	THP-1	blood	Cell	30146161	Christopher Benner	2018-08-23	ChIP-Seq	Homo sapiens	61005
GSM3112063	GSE103477	THP-1	blood	Cell	30146161	Christopher Benner	2018-08-23	ChIP-Seq	Homo sapiens	56792
GSM3112064	GSE103477	THP-1	blood	Cell	30146161	Christopher Benner	2018-08-23	ChIP-Seq	Homo sapiens	59187
GSM3112065	GSE103477	THP-1	blood	Cell	30146161	Christopher Benner	2018-08-23	ChIP-Seq	Homo sapiens	56021
GSM3112066	GSE103477	THP-1	blood	Cell	30146161	Christopher Benner	2018-08-23	ChIP-Seq	Homo sapiens	62333
GSM3112067	GSE103477	THP-1	blood	Cell	30146161	Christopher Benner	2018-08-23	ChIP-Seq	Homo sapiens	58409
GSM3112068	GSE103477	THP-1	blood	Cell	30146161	Christopher Benner	2018-08-23	ChIP-Seq	Homo sapiens	57874
GSM3112069	GSE103477	THP-1	blood	Cell	30146161	Christopher Benner	2018-08-23	ChIP-Seq	Homo sapiens	58657
GSM3112070	GSE103477	THP-1	blood	Cell	30146161	Christopher Benner	2018-08-23	ChIP-Seq	Homo sapiens	67369
GSM3112091	GSE103477	THP-1	blood	Cell	30146161	Christopher Benner	2018-08-23	ChIP-Seq	Homo sapiens	33534
GSM3112092	GSE103477	THP-1	blood	Cell	30146161	Christopher Benner	2018-08-23	ChIP-Seq	Homo sapiens	41142
GSM2891690	GSE108173	HeLa, HeLa-S3	cervix	Genome Res	30166406	Itamar Simon	2018-08-26	ChIP-Seq	Homo sapiens	20004
GSM2891691	GSE108173	HeLa, HeLa-S3	cervix	Genome Res	30166406	Itamar Simon	2018-08-26	ChIP-Seq	Homo sapiens	33035
GSM2891692	GSE108173	HeLa, HeLa-S3	cervix	Genome Res	30166406	Itamar Simon	2018-08-26	ChIP-Seq	Homo sapiens	54780
GSM2891693	GSE108173	HeLa, HeLa-S3	cervix	Genome Res	30166406	Itamar Simon	2018-08-26	ChIP-Seq	Homo sapiens	52421
GSM3211732	GSE111170					Jennifer E Phillips-Cremins	2018-08-29	ChIP-Seq	Homo sapiens	55733
GSM3211733	GSE111170					Jennifer E Phillips-Cremins	2018-08-29	ChIP-Seq	Homo sapiens	52328
GSM3211736	GSE111170					Jennifer E Phillips-Cremins	2018-08-29	ChIP-Seq	Homo sapiens	55557
GSM3211737	GSE111170					Jennifer E Phillips-Cremins	2018-08-29	ChIP-Seq	Homo sapiens	61391
GSM3211740	GSE111170					Jennifer E Phillips-Cremins	2018-08-29	ChIP-Seq	Homo sapiens	54323
GSM3211741	GSE111170					Jennifer E Phillips-Cremins	2018-08-29	ChIP-Seq	Homo sapiens	53132
GSM3324478	GSE118305			Proc Natl Acad Sci U S A	30206152	Aaron F Carlin	2018-09-10	ChIP-Seq	Homo sapiens	27470
GSM3324479	GSE118305			Proc Natl Acad Sci U S A	30206152	Aaron F Carlin	2018-09-10	ChIP-Seq	Homo sapiens	17118
GSM3324480	GSE118305			Proc Natl Acad Sci U S A	30206152	Aaron F Carlin	2018-09-10	ChIP-Seq	Homo sapiens	23440
GSM3329931	GSE104988	MCF7	breast	Cancer Cell	30472020	Kornelia Polyak	2018-10-03	ChIP-Seq	Homo sapiens	19721
GSM3329932	GSE104988	MCF7	breast	Cancer Cell	30472020	Kornelia Polyak	2018-10-03	ChIP-Seq	Homo sapiens	35834
GSM3329934	GSE104988		breast	Cancer Cell	30472020	Kornelia Polyak	2018-10-03	ChIP-Seq	Homo sapiens	29151
GSM3329935	GSE104988		breast	Cancer Cell	30472020	Kornelia Polyak	2018-10-03	ChIP-Seq	Homo sapiens	22821
GSM3094375	GSE113040					Cigall Kadoch	2018-11-04	ChIP-Seq	Homo sapiens	95675
GSM3094382	GSE113040					Cigall Kadoch	2018-11-04	ChIP-Seq	Homo sapiens	102451
GSM3094388	GSE113040					Cigall Kadoch	2018-11-04	ChIP-Seq	Homo sapiens	86707
GSM3094396	GSE113040	Jurkat	blood			Cigall Kadoch	2018-11-04	ChIP-Seq	Homo sapiens	76497
GSM3326010	GSE113040					Cigall Kadoch	2018-11-04	ChIP-Seq	Homo sapiens	77822
GSM3045107	GSE111923	T47D	breast	Genome Res	30523037	Francesc Posas	2018-11-23	ChIP-Seq	Homo sapiens	68563
GSM3045108	GSE111923	T47D	breast	Genome Res	30523037	Francesc Posas	2018-11-23	ChIP-Seq	Homo sapiens	38199
GSM3045109	GSE111923	T47D	breast	Genome Res	30523037	Francesc Posas	2018-11-23	ChIP-Seq	Homo sapiens	39319
GSM3045110	GSE111923	T47D	breast	Genome Res	30523037	Francesc Posas	2018-11-23	ChIP-Seq	Homo sapiens	60336
GSM3045111	GSE111923	T47D	breast	Genome Res	30523037	Francesc Posas	2018-11-23	ChIP-Seq	Homo sapiens	40168
GSM3045112	GSE111923	T47D	breast	Genome Res	30523037	Francesc Posas	2018-11-23	ChIP-Seq	Homo sapiens	34481
GSM3045113	GSE111923	T47D	breast	Genome Res	30523037	Francesc Posas	2018-11-23	ChIP-Seq	Homo sapiens	37425
GSM3415544	GSE111923	T47D	breast	Genome Res	30523037	Francesc Posas	2018-11-23	ChIP-Seq	Homo sapiens	40734
GSM3415545	GSE111923	T47D	breast	Genome Res	30523037	Francesc Posas	2018-11-23	ChIP-Seq	Homo sapiens	42025
GSM3415546	GSE111923	T47D	breast	Genome Res	30523037	Francesc Posas	2018-11-23	ChIP-Seq	Homo sapiens	28122
GSM3415547	GSE111923	T47D	breast	Genome Res	30523037	Francesc Posas	2018-11-23	ChIP-Seq	Homo sapiens	25799
GSM3415548	GSE111923	T47D	breast	Genome Res	30523037	Francesc Posas	2018-11-23	ChIP-Seq	Homo sapiens	47715
GSM3415549	GSE111923	T47D	breast	Genome Res	30523037	Francesc Posas	2018-11-23	ChIP-Seq	Homo sapiens	39889
GSM3498320	GSE123200	OCI-LY1	bone marrow	Nature	22955616	ENCODE DCC	2018-12-03	ChIP-Seq	Homo sapiens	71170
GSM3498321	GSE123200	OCI-LY1	bone marrow	Nature	22955616	ENCODE DCC	2018-12-03	ChIP-Seq	Homo sapiens	34034
GSM3498323	GSE123202			Nature	22955616	ENCODE DCC	2018-12-03	ChIP-Seq	Homo sapiens	63879
GSM3498324	GSE123202			Nature	22955616	ENCODE DCC	2018-12-03	ChIP-Seq	Homo sapiens	53384
GSM3498325	GSE123202			Nature	22955616	ENCODE DCC	2018-12-03	ChIP-Seq	Homo sapiens	71692
GSM3498329	GSE123205	HCT116	colon	Nature	22955616	ENCODE DCC	2018-12-03	ChIP-Seq	Homo sapiens	59574
GSM3498330	GSE123205	HCT116	colon	Nature	22955616	ENCODE DCC	2018-12-03	ChIP-Seq	Homo sapiens	55338
GSM3498385	GSE123210	PC3	prostate	Nature	22955616	ENCODE DCC	2018-12-03	ChIP-Seq	Homo sapiens	53018
GSM3498386	GSE123210	PC3	prostate	Nature	22955616	ENCODE DCC	2018-12-03	ChIP-Seq	Homo sapiens	73791
GSM3498389	GSE123213			Nature	22955616	ENCODE DCC	2018-12-03	ChIP-Seq	Homo sapiens	33987
GSM3498390	GSE123213			Nature	22955616	ENCODE DCC	2018-12-03	ChIP-Seq	Homo sapiens	29376
GSM3498391	GSE123214	Loucy	blood	Nature	22955616	ENCODE DCC	2018-12-03	ChIP-Seq	Homo sapiens	70537
GSM3498392	GSE123214	Loucy	blood	Nature	22955616	ENCODE DCC	2018-12-03	ChIP-Seq	Homo sapiens	58465
GSM3498397	GSE123217	SK-N-SH	brain	Nature	22955616	ENCODE DCC	2018-12-03	ChIP-Seq	Homo sapiens	50698
GSM3498398	GSE123217	SK-N-SH	brain	Nature	22955616	ENCODE DCC	2018-12-03	ChIP-Seq	Homo sapiens	57230
GSM3498401	GSE123219	MCF7	breast	Nature	22955616	ENCODE DCC	2018-12-03	ChIP-Seq	Homo sapiens	50342
GSM3498402	GSE123219	MCF7	breast	Nature	22955616	ENCODE DCC	2018-12-03	ChIP-Seq	Homo sapiens	68387
GSM3498405	GSE123221			Nature	22955616	ENCODE DCC	2018-12-03	ChIP-Seq	Homo sapiens	54589
GSM3498406	GSE123221			Nature	22955616	ENCODE DCC	2018-12-03	ChIP-Seq	Homo sapiens	54781
GSM3498411	GSE123224			Nature	22955616	ENCODE DCC	2018-12-03	ChIP-Seq	Homo sapiens	46939
GSM3498412	GSE123225			Nature	22955616	ENCODE DCC	2018-12-03	ChIP-Seq	Homo sapiens	64341
GSM3498413	GSE123225			Nature	22955616	ENCODE DCC	2018-12-03	ChIP-Seq	Homo sapiens	54229
GSM3498432	GSE123234			Nature	22955616	ENCODE DCC	2018-12-03	ChIP-Seq	Homo sapiens	61719
GSM3498433	GSE123234			Nature	22955616	ENCODE DCC	2018-12-03	ChIP-Seq	Homo sapiens	62462
GSM3333908	GSE118588		pancreas	Cell Rep	30650367	Michael Stitzel	2019-01-08	ChIP-Seq	Homo sapiens	767
GSM2915166	GSE108869	HeLa	cervix	Nat Commun	30948729	Kaimeng Huang	2019-01-12	ChIP-Seq	Homo sapiens	85816
GSM3591389	GSE126083			Mol Cell	30902546	Wei-Yi Chen	2019-02-06	ChIP-Seq	Homo sapiens	79070
GSM3591390	GSE126083			Mol Cell	30902546	Wei-Yi Chen	2019-02-06	ChIP-Seq	Homo sapiens	72021
GSM3466810	GSE122463	HT1080	fibroblast	Nat Commun	30926878	Artem Luzhin	2019-02-18	ChIP-Seq	Homo sapiens	66201
GSM3466811	GSE122463	HT1080	fibroblast	Nat Commun	30926878	Artem Luzhin	2019-02-18	ChIP-Seq	Homo sapiens	41540
GSM3466812	GSE122463	HT1080	fibroblast	Nat Commun	30926878	Artem Luzhin	2019-02-18	ChIP-Seq	Homo sapiens	79937
GSM3466813	GSE122463	HT1080	fibroblast	Nat Commun	30926878	Artem Luzhin	2019-02-18	ChIP-Seq	Homo sapiens	43135
GSM3263165	GSE116876		breast	Mol Cell	30745086	YEQIAO ZHOU	2019-02-27	ChIP-Seq	Homo sapiens	47467
GSM3263166	GSE116876		breast	Mol Cell	30745086	YEQIAO ZHOU	2019-02-27	ChIP-Seq	Homo sapiens	39128
GSM3634119	GSE127342			Nature	22955616	ENCODE DCC	2019-03-03	ChIP-Seq	Homo sapiens	17611
GSM3634158	GSE127359			Nature	22955616	ENCODE DCC	2019-03-03	ChIP-Seq	Homo sapiens	60745
GSM3634191	GSE127378			Nature	22955616	ENCODE DCC	2019-03-03	ChIP-Seq	Homo sapiens	22339
GSM3634270	GSE127422			Nature	22955616	ENCODE DCC	2019-03-03	ChIP-Seq	Homo sapiens	38818
GSM3634271	GSE127422			Nature	22955616	ENCODE DCC	2019-03-03	ChIP-Seq	Homo sapiens	38360
GSM3634304	GSE127433			Nature	22955616	ENCODE DCC	2019-03-03	ChIP-Seq	Homo sapiens	75108
GSM3635390	GSE127477			Nature	22955616	ENCODE DCC	2019-03-03	ChIP-Seq	Homo sapiens	43610
GSM3635793	GSE127521			Nature	22955616	ENCODE DCC	2019-03-03	ChIP-Seq	Homo sapiens	75570
GSM3636075	GSE127549		liver	Nature	22955616	ENCODE DCC	2019-03-03	ChIP-Seq	Homo sapiens	40997
GSM3636076	GSE127549		liver	Nature	22955616	ENCODE DCC	2019-03-03	ChIP-Seq	Homo sapiens	33320
GSM3636093	GSE127553			Nature	22955616	ENCODE DCC	2019-03-03	ChIP-Seq	Homo sapiens	56957
GSM3636177	GSE127577	hESC, H1-HESC	stem	Nature	22955616	ENCODE DCC	2019-03-03	ChIP-Seq	Homo sapiens	56356
GSM3636178	GSE127577	hESC, H1-HESC	stem	Nature	22955616	ENCODE DCC	2019-03-03	ChIP-Seq	Homo sapiens	45792
GSM3636179	GSE127577	hESC, H1-HESC	stem	Nature	22955616	ENCODE DCC	2019-03-03	ChIP-Seq	Homo sapiens	2050
GSM3636209	GSE127595	RWPE1, RWPE2	prostate	Nature	22955616	ENCODE DCC	2019-03-03	ChIP-Seq	Homo sapiens	64741
GSM3636210	GSE127595	RWPE1, RWPE2	prostate	Nature	22955616	ENCODE DCC	2019-03-03	ChIP-Seq	Homo sapiens	56054
GSM3612215	GSE126758					Matthew Denholtz	2019-03-14	ChIP-Seq	Homo sapiens	29605
GSM3612216	GSE126758					Matthew Denholtz	2019-03-14	ChIP-Seq	Homo sapiens	12540
GSM3612217	GSE126758					Matthew Denholtz	2019-03-14	ChIP-Seq	Homo sapiens	17960
GSM3612218	GSE126758					Matthew Denholtz	2019-03-14	ChIP-Seq	Homo sapiens	13164
GSM3612219	GSE126758					Matthew Denholtz	2019-03-14	ChIP-Seq	Homo sapiens	38822
GSM3612220	GSE126758					Matthew Denholtz	2019-03-14	ChIP-Seq	Homo sapiens	8582
GSM3671692	GSE128346	A375	skin	Cell Syst	31078526	Ping Chi	2019-03-16	ChIP-Seq	Homo sapiens	18437
GSM2913222	GSE108787	MCF7	breast	Nat Commun	30944316	Yufan Zhou	2019-04-09	ChIP-Seq	Homo sapiens	106621
GSM2913230	GSE108787	MCF7, ME-1	breast, blood	Nat Commun	30944316	Yufan Zhou	2019-04-09	ChIP-Seq	Homo sapiens	81712
GSM2913238	GSE108787	MCF7	breast	Nat Commun	30944316	Yufan Zhou	2019-04-09	ChIP-Seq	Homo sapiens	46375
GSM2913246	GSE108787	MCF7, ME-1	breast, blood	Nat Commun	30944316	Yufan Zhou	2019-04-09	ChIP-Seq	Homo sapiens	64904
GSM2913254	GSE108787	MCF7	breast	Nat Commun	30944316	Yufan Zhou	2019-04-09	ChIP-Seq	Homo sapiens	98151
GSM2913266	GSE108787	TAMR, MCF7	breast	Nat Commun	30944316	Yufan Zhou	2019-04-09	ChIP-Seq	Homo sapiens	42035
GSM3192041	GSE115862	SK-N-SH	brain	Cell	30955885	Daniele Canzio	2019-04-15	ChIP-Seq	Homo sapiens	34195
GSM3192045	GSE115862	HEK293, SK-N-SH, 293T, HEK293T	brain, kidney	Cell	30955885	Daniele Canzio	2019-04-15	ChIP-Seq	Homo sapiens	36481
GSM3755264	GSE130852	MCF7	breast			Gerry A. Coetzee	2019-05-09	ChIP-Seq	Homo sapiens	59667
GSM3755265	GSE130852	MCF7	breast			Gerry A. Coetzee	2019-05-09	ChIP-Seq	Homo sapiens	73704
GSM3312803	GSE117864					Thomas A Milne	2019-05-30	ChIP-Seq	Homo sapiens	43500
GSM3439930	GSE121601					Marco Gallo	2019-06-06	ChIP-Seq	Homo sapiens	46066
GSM3439931	GSE121601					Marco Gallo	2019-06-06	ChIP-Seq	Homo sapiens	49197
GSM3439933	GSE121601					Marco Gallo	2019-06-06	ChIP-Seq	Homo sapiens	46544
GSM3439934	GSE121601					Marco Gallo	2019-06-06	ChIP-Seq	Homo sapiens	46603
GSM3439936	GSE121601					Marco Gallo	2019-06-06	ChIP-Seq	Homo sapiens	55731
GSM3439937	GSE121601					Marco Gallo	2019-06-06	ChIP-Seq	Homo sapiens	59238
GSM3509945	GSE123711			Epigenetics Chromatin	31164150	Jo Huiqing Zhou	2019-06-21	ChIP-Seq	Homo sapiens	14842
GSM3509948	GSE123711			Epigenetics Chromatin	31164150	Jo Huiqing Zhou	2019-06-21	ChIP-Seq	Homo sapiens	17235
GSM3509951	GSE123711			Epigenetics Chromatin	31164150	Jo Huiqing Zhou	2019-06-21	ChIP-Seq	Homo sapiens	13261
GSM3732739	GSE130140	JURKAT	blood					ChIP-Seq	Homo sapiens	18302
GSM3732740	GSE130140	JURKAT	blood					ChIP-Seq	Homo sapiens	30261
GSM3732743	GSE130140	CUTLL1	blood					ChIP-Seq	Homo sapiens	8818
GSM3732744	GSE130140	CUTLL1	blood					ChIP-Seq	Homo sapiens	14442
GSM3732747	GSE130140	CUTLL1	blood					ChIP-Seq	Homo sapiens	28618
GSM3732749	GSE130140	CUTLL1	blood					ChIP-Seq	Homo sapiens	36692
NOTES: Data marked in red are in-house datasets available in GSE130140
