# Supplementary material for: Cancer-specific CTCF binding facilitates oncogenic transcriptional dysregulation
Source: Genome Biol. 2020 Sep 15;21:247. doi: 10.1186/s13059-020-02152-7 (PMC7493976; doi:10.1186/s13059-020-02152-7)
Supplement: Supplementary file 6 — Additional file 6: Table S5. Lists of collected public multi-omics data, including ATAC-seq, DNA methylation, Hi-C, ChIP-seq and RNA-seq used in this study. [file 13059_2020_2152_MOESM6_ESM.xlsx]

## Sheet: ATAC-seq
	GSM
Jurkat	GSM2411156
	GSM2411157
	GSM2411158
CD4+ T	GSM1155964
	GSM1155965
	GSM1155966
	GSM1155967
	GSM1155968
	GSM1155969

## Sheet: DNA methylation
Cell Type	GSM/ENCODE ID
BRCA	ENCFF001TOZ
	ENCFF001TPA
	ENCFF001TPB
	ENCFF001TPC
Breast normal	ENCFF001TJY
	ENCFF001TJZ
CRC	ENCFF001TMM
	ENCFF001TMN
Colon normal	ENCFF157POM
	ENCFF455TQO
LUAD	ENCFF003JVR
	ENCFF005TID
Lung normal	ENCFF039JFT
PRAD	GSM2309185
	GSM2309186
	GSM2309187
	GSM2309188
	GSM2309189
Prostate normal	ENCFF027KTR

## Sheet: Hi-C
	ID	Restriction	References
CRC	GSM2795535	MboI	Rao,2017
	GSM2795536	MboI	Rao,2018
	GSM2795537	MboI	Rao,2019
Colon normal	ENCSR504OTV	MboI	ENCODE
	ENCSR295BDK	MboI	ENCODE

## Sheet: Histone Modification
Jurkat			CUTLL1			CD4			BRCA			Breast normal			CRC			Colon normal			LUAD			Lung normal
H3K27ac	H3K27me3	H3K4me1	H3K27ac	H3K27me3	H3K4me1	H3K27ac	H3K27me3	H3K4me1	H3K27ac	H3K27me3	H3K4me1	H3K27ac	H3K27me3	H3K4me1	H3K27ac	H3K27me3	H3K4me1	H3K27ac	H3K27me3	H3K4me1	H3K27ac	H3K27me3	H3K4me1	H3K27ac	H3K27me3	H3K4me1
GSM1246865	GSM569089	GSM1603224	GSM1252938	GSM732912	GSM732910	GSM1462467	GSM772998	GSM1462463	GSM946850	GSM588565	GSM588569	ENCFF422CZO	ENCFF114URN	ENCFF849QCZ	GSM946854	GSM699328	GSM946853	ENCFF769DYQ	ENCFF403ZNV	ENCFF289QMK	GSM1038443	GSM1038448	GSM1038451	ENCFF684FZC	ENCFF048FDD	ENCFF417RJB
GSM1296384	GSM1062740	GSM1603225	GSM1252939	GSM1366924		GSM1462468	GSM772919	GSM1462464	GSM1115993	GSM588564	GSM588568				GSM1224664	GSM955164	GSM1240111	ENCFF048VKL		ENCFF249RML	GSM1038444	GSM1038447	GSM1038452	ENCFF540ZWQ		ENCFF535HZX
GSM1431908			GSM1252940	GSM1366925		GSM1841082	GSM772947	GSM772884	GSM1115992	GSM1369947	GSM946849				GSM1224665	GSM955165	GSM1240112				GSM1003493	GSM1018047	GSM1003453
GSM1431909				GSM1366926		GSM1841083	GSM1220565	GSM1220567	GSM986077	GSM1383860	GSM1115994				GSM945853	GSM1415877	GSM945858				GSM1003578	GSM1018051	GSM1003495
GSM1603210				GSM1366927		GSM1841084	GSM3732770	GSM772860	GSM986079	GSM949580	GSM986084				GSM1465028	GSM1420155	GSM1415875					GSM1018043
GSM1603211				GSM1366928		GSM1841085			GSM986080		GSM986082				GSM1465029		GSM1420154					GSM1003455
GSM1697882				GSM1366929		GSM1841086			GSM986078		GSM986081				GSM1415876		GSM1866700					GSM1003577
						GSM1841087			GSM1059386		GSM986083				GSM1866701							GSM1970037
						GSM1841088			GSM945854		GSM1383861
						GSM1841089			GSM1383859		GSM1382468
						GSM1841090			GSM1402796		GSM1382469
						GSM1841091			GSM1402797		GSM1382478
						GSM1841092			GSM1402798		GSM1382479
						GSM1841093			GSM1402799
						GSM1841094			GSM1402800
						GSM1841095			GSM1402801
						GSM1893230			GSM1693017
						GSM1893231			GSM1382472
						GSM1893234			GSM1382473
						GSM1893235			GSM1382482
						GSM1893238			GSM1382483
						GSM1847867			GSM1523087
						GSM1847870			GSM1523088
						GSM1847872			GSM1523089
						GSM1847874			GSM1523090
						GSM3732769			GSM1523091
									GSM1523092
									GSM1481570
									GSM1481571
									GSM1481572
						NOTES: Data marked in red are in-house datasets available in GSE130140

## Sheet: RNA_vs_ChIP_in_54CellTypes
Cell Type	RNA-seq ID	ChIP-seq ID
22Rv1	GSM3356414	GSM2828838
	GSM3356415	GSM2828839
	GSM3356416	GSM2828864
	GSM2432779	GSM2828865
A549	ENCSR937WIG	GSM1003581
	ENCSR632DQP	GSM1003582
		GSM1003606
		GSM1022639
		GSM1022640
		GSM2437717
		GSM2437718
		GSM2437719
		GSM2437728
		GSM2437729
		GSM2437730
		GSM2437737
		GSM2437738
		GSM2437739
		GSM2437756
		GSM2437757
		GSM2437758
		GSM2437764
		GSM2437765
		GSM2437771
		GSM2437772
		GSM2437773
		GSM2437780
		GSM2437781
		GSM2437782
		GSM2437791
		GSM2437792
		GSM2437793
		GSM2437798
		GSM2437799
		GSM2437800
		GSM2437819
		GSM2437820
		GSM2437821
		GSM2437875
		GSM2437876
		GSM2437877
		GSM2437881
		GSM2437882
		GSM2437883
		GSM803453
		GSM803456
		GSM822289
adrenal_gland	ENCSR680AAZ	GSM2824375
	ENCSR598KJX	GSM2828902
		GSM2828999
		GSM2827383
AG04450	ENCSR000COO	GSM749769
		GSM1022635
ascending_aorta	ENCSR719PXC	GSM2828714
BJ	ENCSR000COP	GSM749752
		GSM749677
body_of_pancreas	ENCSR671IYC	GSM2827130
	ENCSR586SYA	GSM2827540
		GSM2827160
		GSM2825676
breast_epithelium	ENCSR094VRQ	GSM2827381
	ENCSR438YPF	GSM2827153
	ENCSR434TEU	GSM2827526
CD4	GSM3732717	GSM1936635
	GSM3732718	GSM1936636
	GSM3732719	GSM325895
	GSM3732720
CUTLL1	GSM1863090	GSM3732743
	GSM1863094	GSM3732744
		GSM3732747
		GSM3732749
erythroid	GSM1319846	GSM2140685
	GSM1319847	GSM1655739
	GSM1319848	GSM2730056
	GSM1319849	GSM2730057
	GSM1319850	GSM1273199
	GSM1319851
	GSM1319852
	GSM1319853
	GSM1508259
	GSM1508260
	GSM1508261
	GSM1508262
	GSM1508263
	GSM1508264
	GSM1657640
	GSM1657641
	GSM1657642
	GSM2730037
	GSM2730038
	GSM2730039
	GSM2730040
esophagus_muscularis_mucosa	ENCSR098BUF	GSM2827319
	ENCSR750ETS	GSM2825085
	ENCSR182CBU	GSM2827544
esophagus_squamous_epithelium	ENCSR474TRG	GSM2824328
	ENCSR510MIA	GSM2828903
		GSM2828722
		GSM2827389
gastrocnemius_medialis	ENCSR609NZM	GSM2825069
	ENCSR678TMV	GSM2827238
	ENCSR967JPI	GSM2828911
gastroesophageal_sphincter	ENCSR485WBR	GSM2825554
	ENCSR740YMS	GSM2827382
GM12878	ENCSR000AEE	GSM1233887
	ENCSR000AEC	GSM1233888
		GSM2040764
		GSM2040765
		GSM489290
		GSM489291
		GSM489292
		GSM646314
		GSM646315
		GSM733752
		GSM749704
		GSM749706
		GSM822312
		GSM935611
GM12891	ENCSR000CWK	GSM1233933
		GSM1233934
		GSM489293
		GSM489294
		GSM822294
H1-HESC	ENCSR670WQY	GSM733672
	ENCSR043RSE	GSM803419
	ENCSR000COU	GSM822297
HCT116	ENCSR000CWM	GSM1010903
		GSM1022651
		GSM1022652
		GSM1224649
		GSM1224650
		GSM1224651
		GSM1224652
		GSM1224653
		GSM1224654
		GSM1224655
		GSM2439226
		GSM2809613
		GSM2809614
		GSM2809615
		GSM2809616
		GSM3498329
		GSM3498330
HeLa-S3	ENCSR000CPR	GSM733785
	ENCSR000EYQ	GSM749739
		GSM749729
		GSM822285
HepG2	ENCSR000EYR	GSM3019944
	ENCSR181ZGR	GSM614630
		GSM614631
		GSM646353
		GSM646354
		GSM733645
		GSM748538
		GSM748539
		GSM749683
		GSM749715
		GSM803486
		GSM822287
IMR90	ENCSR000CTQ	GSM1055825
		GSM935404
Jurkat	GSM3732721	GSM1689152
	GSM3732722	GSM3094396
	GSM3732723	GSM325899
		GSM3732739
		GSM3732740
K562	ENCSR000AEL	GSM1010820
	ENCSR000AEN	GSM1224656
		GSM1224657
		GSM1224658
		GSM1224659
		GSM1224660
		GSM1224672
		GSM1224673
		GSM1224674
		GSM1224675
		GSM1782700
		GSM1782701
		GSM1817654
		GSM2410500
		GSM2410502
		GSM2410504
		GSM2439223
		GSM2439225
		GSM624080
		GSM646432
		GSM646433
		GSM733719
		GSM749690
		GSM749733
		GSM822311
		GSM935407
LNCaP	GSM2432771	GSM1006874
	GSM721116	GSM1006887
	GSM721117	GSM2827202
	GSM721118	GSM2827203
	GSM721119	GSM2827438
	GSM721120	GSM2827439
	GSM721121	GSM947528
	GSM721122
	GSM947445
lower_leg_skin	ENCSR551NII	GSM2827589
	ENCSR991HIR	GSM2825588
	ENCSR460YCS
MCF7	ENCSR000CWQ	GSM1006875
		GSM1006878
		GSM1010734
		GSM1022658
		GSM1022663
		GSM1817665
		GSM1817666
		GSM1817667
		GSM2067524
		GSM2067525
		GSM2067526
		GSM2067527
		GSM2257816
		GSM2257817
		GSM2747717
		GSM2747727
		GSM2877982
		GSM2877993
		GSM3329931
		GSM3329932
		GSM3498401
		GSM3498402
		GSM3755264
		GSM3755265
		GSM614614
		GSM614615
		GSM614636
		GSM614637
		GSM631475
		GSM631476
		GSM631477
		GSM631478
		GSM631479
		GSM808752
		GSM808753
		GSM822305
		GSM822308
		GSM822309
MOLM13	GSM2602076	GSM3094382
	GSM2602077
	GSM2602078
	GSM3326026
	GSM3326027
neural_cell	ENCSR292TAP	GSM3636177
		GSM3636178
		GSM3636179
neural_progenitor_cell	ENCSR244ISQ	GSM3498323
		GSM3498324
		GSM3498325
OCI-LY7	ENCSR001HHK	GSM2698420
		GSM2698421
omental_fat_pad	ENCSR729CAZ	GSM2825521
	ENCSR645TCG	GSM2825118
	ENCSR080HPT
ovary	ENCSR725TPW	GSM2827512
	ENCSR042GYH	GSM2827573
	ENCSR841ADZ
Panc1	ENCSR000BYM	GSM1684574
		GSM2825441
		GSM2825442
PC3	ENCSR420NLC	GSM1383877
		GSM3498385
		GSM3498386
Peyers_patch	ENCSR450BNZ	GSM2827411
	ENCSR802HPM	GSM2827222
	ENCSR544SAU	GSM2827359
		GSM2828983
PrEC	GSM721123	GSM947527
	GSM721125
	GSM721126
	GSM947444
prostate	GSM2361280	GSM2825573
	GSM2361283	GSM2825574
	GSM2361285
	GSM2361287
	GSM2361289
	GSM2361291
	GSM2361293
	GSM2361295
	GSM2361297
	GSM2361299
	GSM2361301
	GSM2361303
	GSM2361305
prostate_gland	ENCSR495HDM	GSM2828516
	ENCSR701TST	GSM2828639
right_lobe_of_liver	ENCSR504QMK	GSM2828488
	ENCSR226KML
sigmoid_colon	ENCSR999ZCI	GSM2827224
	ENCSR812AKX	GSM2828560
	ENCSR094GVZ	GSM2827277
	ENCSR857WJK	GSM2828521
		GSM2825505
SK-N-SH	ENCSR000CTT	GSM1003633
		GSM2038347
		GSM3192041
		GSM3498397
		GSM3498398
		GSM749693
		GSM803333
spleen	ENCSR510PSL	GSM2827505
	ENCSR910QOX	GSM2827510
		GSM2825544
		GSM2825289
		GSM1006883
stomach	ENCSR853WOM	GSM2825527
	ENCSR296PMS	GSM2827524
subcutaneous_adipose	ENCSR150QJY	GSM2828975
	ENCSR504NIU
	ENCSR708VVE
suprapubic_skin	ENCSR480SLD	GSM2828855
	ENCSR450ENK	GSM2825424
	ENCSR108MAU
testis	ENCSR029KNZ	GSM2827575
	ENCSR344MQK	GSM2828871
thyroid_gland	ENCSR687HJY	GSM2828709
	ENCSR532LJV	GSM2828820
	ENCSR238ZZD	GSM2827572
tibial_nerve	ENCSR272UNO	GSM2828550
	ENCSR796HLX	GSM2827473
		GSM2827293
transverse_colon	ENCSR403SZN	GSM2827542
	ENCSR653ZJF	GSM2828900
		GSM2825406
		GSM2828689
upper_lobe_of_left_lung	ENCSR425RGZ	GSM2828802
	ENCSR406SAW	GSM2828799
	ENCSR313COD	GSM2825136
		GSM2828718
uterus	ENCSR071ZLM	GSM2828982
	ENCSR113HQM	GSM2827412
vagina	ENCSR146LBD	GSM2827328
		GSM2827161
VCaP	GSM2432767	GSM2235690
		GSM2235691
		GSM2235692
		GSM2235693
		GSM2825674
		GSM2825675
NOTES: Data marked in red are in-house datasets available in GSE130140
