# Supplementary material for: Cancer-specific CTCF binding facilitates oncogenic transcriptional dysregulation
Source: Genome Biol. 2020 Sep 15;21:247. doi: 10.1186/s13059-020-02152-7 (PMC7493976; doi:10.1186/s13059-020-02152-7)
Supplement: Supplementary file 8 — Additional file 8: Table S7. BART prediction results for oncogenic TFs in T-ALL and CRC. [file 13059_2020_2152_MOESM8_ESM.xlsx]

## Sheet: T-ALL BART
	odds ratio	pvalue
MYB	12.62	2.9e-53
RUNX1	9.25	3.87e-45
NOTCH1	12.29	1.33e-41
ERG	7.98	5.89e-39
TAL1	8.22	1.29e-38
SPI1	7.23	8.88e-38
MED1	7.03	2.25e-36
TRIM28	7.04	3.14e-36
ETS1	9.51	4.65e-36
POLR2A	9.47	1.36e-35
MYC	6.71	8.36e-35
BRD4	6.36	1.19e-32
H2AZ	6.24	1.48e-32
CDK8	7.49	2.4e-32
SMARCA4	6.28	5.5e-32
TCF12	6.33	6.76e-32
RBPJ	9.56	3.37e-31
EZH2	6.68	4.29e-31
KMT2A	6.7	6.16e-31
GABPA	7.01	6.31e-31
MAX	5.88	6.42e-31
SNAI2	6.89	1e-30
EP300	6.06	2.84e-30
CTCF	5.76	2.91e-30
TLX1	19	7.34e-30
NR3C1	5.66	1.4e-29
GATA1	6.49	3.28e-29
TCF4	7.92	1.83e-28
FAIRE	6.09	8.34e-28
SMAD1	7.69	9.64e-27
CEBPA	6.33	2.31e-26
RAD21	5.07	2.53e-26
SOX2	5.82	2.87e-26
STAT1	6.04	2.94e-26
RAG2	11.26	3.52e-26
KDM1A	6.03	5.68e-26
POLR3D	5.38	9.09e-26
LMO1	12.41	2.77e-25
REPIN1	7.24	3.33e-25
SMC1A	5.74	4.3e-25
CEBPB	4.84	4.9e-25
KDM6A	12.65	6.07e-25
TCF7L1	6.28	7.92e-25
TERC	6.05	1.45e-24
CDK7	8.86	2.24e-24
HDAC1	5.46	2.41e-24
FOXA1	4.71	5.07e-24
AR	4.67	5.81e-24
YY1	5.09	6.83e-24
ZNF143	6.07	7.86e-24
REST	5.15	1.1e-23
FLI1	5.61	1.96e-23
IRF4	6.2	2e-23
BMI1	6.65	3.13e-23
STAG1	5.07	3.55e-23
SUMO2	5.14	6.06e-23
BCL6	6.32	6.47e-23
JUND	4.71	7.83e-23
ESR1	4.49	1.66e-22
NFIC	5.19	2.29e-22
SPIB	6.81	2.62e-22
PR	4.73	5.34e-22
USF1	5.56	1.61e-21
ATF3	5.31	2.34e-21
SRF	5.63	2.9e-21
CDK9	5.62	3.3e-21
NFE2	6.13	4.05e-21
HDAC2	4.71	5.44e-21
RELA	4.6	6.65e-21
KDM5B	4.75	7.76e-21
LMNB1	5.36	8.25e-21
KLF1	6.12	9.06e-21
ZBTB48	5.21	1.01e-20
SP1	4.54	1.28e-20
GATA2	4.58	1.68e-20
MYH11	6.13	1.74e-20
ELF1	5.27	3.03e-20
FOSL1	5.64	3.32e-20
GATA3	4.11	4.02e-20
PSMA7	6.64	4.04e-20
CBX3	5.45	4.12e-20
LMO2	9.93	4.61e-20
SMC3	5.23	7.18e-20
IRF1	5.44	7.81e-20
JUN	4.82	8.22e-20
TEAD4	4.25	1.89e-19
TFAP2A	5.03	4.01e-19
FOXA2	4.53	6.14e-19
HOXB13	4.91	1.07e-18
STAT4	6.97	1.29e-18
IKZF1	4.49	1.34e-18
RUNX3	5.27	1.75e-18
TFAP2C	4.85	1.8e-18
PPARG	5.04	1.84e-18
FOSL2	4.86	2.91e-18
RFX5	6.13	3.28e-18
ZBTB2	7.55	4.63e-18
FOS	4.36	5.17e-18
VDR	5.86	7.36e-18
NKX2-1	5.22	8.95e-18
CDK12	17.01	1.07e-17
RCOR1	4.59	2.86e-17
OTX2	4.18	3.54e-17
EOMES	5.57	4.27e-17
FOXM1	4.74	6.42e-17
ATF2	4.81	1.05e-16
WDR5	4.87	1.16e-16
FOXP1	4.64	1.39e-16
PAX5	5.83	1.75e-16
STAT3	4.47	2.28e-16
AFF1	5.49	5.51e-16
KDM2B	4.89	5.79e-16
PROX1	6.99	7.24e-16
NIPBL	4.5	7.84e-16
CREB1	4.17	9.42e-16
TOP1	4.96	1.16e-15
JMJD1C	5.45	1.43e-15
NRF1	6.8	1.53e-15
EED	4.92	1.56e-15
EBF1	4.96	2.1e-15
CDCA2	4.96	2.15e-15
RNF2	4.56	2.15e-15
NCOR1	8.18	2.4e-15
BHLHE40	4.67	2.83e-15
MLLT1	4.67	2.89e-15
NELFE	6.21	3.15e-15
RING1	6.36	3.82e-15
SIX2	5.51	4.23e-15
HIF1A	4.23	4.71e-15
TBX21	5.59	5.91e-15
MXI1	4.64	6.34e-15
SIN3A	4.12	8.11e-15
MAZ	4.23	1.19e-14
ZNF600	5.32	1.22e-14
EGR1	4.98	1.25e-14
ZBTB33	4.87	1.33e-14
IRF5	6.25	1.44e-14
NR2F1	4.31	1.63e-14
YAP1	4.19	1.7e-14
RXRG	10.57	1.73e-14
BCOR	4.78	2.38e-14
ELF3	4.86	2.56e-14
TRIM22	6.47	3.37e-14
TRIM24	4.8	3.92e-14
RELB	6.2	4.09e-14
MTA2	4.24	4.51e-14
ZNF384	5.48	4.52e-14
RXRA	4.75	5.12e-14
MAFK	4.36	5.15e-14
CTCFL	6.03	8.12e-14
BATF	5.67	8.17e-14
CREBBP	4.68	8.44e-14
TFAP4	4.42	9.25e-14
MED12	6.65	1.07e-13
PML	4.69	2.5e-13
RUNX1T1	6.65	2.79e-13
FUS	8.46	3.42e-13
TP53	4.08	4.41e-13
RUNX2	5.16	4.76e-13
KDM6B	5.44	5.03e-13
NANOG	4.47	5.85e-13
GLIS1	4.86	6.12e-13
NR4A1	4.7	8.31e-13
USF2	4.77	9.97e-13
PAF1	5.82	1.02e-12
KLF5	4.45	1.18e-12
FOXP2	6.49	1.21e-12
NR2F2	3.48	1.32e-12
XBP1	5.75	1.37e-12
GRHL3	4.95	1.37e-12
TAF1	4.18	1.42e-12
PBX3	3.77	1.54e-12
TBP	4.4	1.61e-12
ICE1	6.29	2.34e-12
EGR3	4.95	2.67e-12
MBD1	6.83	2.68e-12
POU2F2	4.7	2.85e-12
KLF9	5.16	3.9e-12
BCLAF1	5	4.1e-12
TP63	4.71	4.94e-12
ASCL1	5.25	5.24e-12
KLF4	4.39	5.51e-12
HDAC3	8.83	5.56e-12
MITF	4.68	5.88e-12
GATA4	3.86	6.42e-12
SUMO1	5.73	7.32e-12
SMAD4	5.31	8.53e-12
ZNF362	5.69	8.65e-12
SMAD2-SMAD3	7.13	8.73e-12
ZBTB40	3.93	8.97e-12
PCGF2	7.11	9e-12
HDGF	4.98	9.28e-12
NKX3-1	5.42	1.16e-11
CBX5	5.82	1.2e-11
NEUROD1	4.09	1.28e-11
ASH2L	7.36	1.36e-11
SMAD3	3.87	1.45e-11
ZBTB17	4	1.46e-11
NR1H3	4.51	1.53e-11
ETV1	5.75	1.59e-11
STAT5A	4.71	1.84e-11
CEBPD	5.69	1.95e-11
CBX1	4.82	1.97e-11
HMBOX1	6.18	2.03e-11
PIAS1	4.2	3e-11
ZNF382	4.11	3.12e-11
MTA3	4.6	3.17e-11
CHD8	4.03	3.17e-11
IKZF2	4.58	3.55e-11
PRDM1	4.84	3.62e-11
POLR2AphosphoS5	4.46	3.78e-11
ZEB2	4.16	3.84e-11
MEIS1	14.08	3.89e-11
E2F1	3.91	4.32e-11
SOX4	3.91	4.32e-11
DDX5	6.51	4.68e-11
SP140	5.89	5.18e-11
POU5F1	3.78	7.16e-11
MYOD1	5.1	9.04e-11
HEXIM1	4.63	9.97e-11
RFX1	4.9	1.04e-10
E2F6	4.28	1.04e-10
EBF3	4.72	1.19e-10
CD34	8.48	1.2e-10
ESCO2	6.46	1.39e-10
SSRP1	4.55	1.42e-10
KLF16	6.81	1.49e-10
MYF5	6.75	1.72e-10
BRD9	8.93	1.91e-10
TCF7L2	3.53	2.04e-10
CEBPG	5.45	2.3e-10
GRHL2	3.86	2.61e-10
H3F3A	4.55	2.68e-10
CDX2	4.84	2.75e-10
CBFB	4.19	2.93e-10
HNF4A	4.17	3.34e-10
NEUROG2	4.13	4.06e-10
ZNF366	4.56	5.04e-10
ZMYND8	4.09	5.31e-10
EGLN2	5.22	5.36e-10
TEAD1	4.18	5.51e-10
HSF1	3.97	5.98e-10
ZBTB7A	4.15	6.38e-10
LARP7	4.47	7.68e-10
SP7	4.42	9.57e-10
LYL1	7.94	1.01e-09
ZNF2	5.03	1.09e-09
MEF2A	4.37	1.19e-09
FOXK2	4.99	1.27e-09
MEF2B	4.46	1.48e-09
NR2F6	4.31	1.59e-09
ING2	5.13	1.6e-09
ZNF766	4.71	1.85e-09
GLIS2	5.54	2e-09
ZNF534	8.16	2.24e-09
ZBTB42	8.9	2.5e-09
BCL11A	4.64	2.5e-09
MYBL2	4.48	2.57e-09
MBD4	5.17	2.89e-09
MYNN	5.42	2.9e-09
HLF	4.43	3.18e-09
SUPT5H	3.96	3.21e-09
ATF1	3.77	3.28e-09
ING5	4.16	3.38e-09
CHD2	3.92	3.94e-09
GLI2	6.25	3.99e-09
HEY1	5.04	4.62e-09
HOTAIR	4.97	5.76e-09
RARA	4.77	5.8e-09
HNF4G	4.73	6.76e-09
ZNF654	6.03	6.83e-09
ARID3A	4.37	7.67e-09
MECP2	4.89	7.84e-09
MAFF	4.35	8.6e-09
SOX9	5.93	8.76e-09
HOXA6	7.32	9.08e-09
BPTF	7.28	9.75e-09
EMX1	5.03	9.96e-09
SCRT1	6.25	1.02e-08
NFKB1	5.23	1.15e-08
NFATC3	5.21	1.2e-08
SIX1	7.82	1.23e-08
ZFP69B	5.48	1.23e-08
598-SKD	4.54	1.4e-08
BRD3	4.38	1.42e-08
ZBTB11	4.72	1.43e-08
BRD2	3.77	1.54e-08
AHR	5.13	1.56e-08
JMJD6	4.69	1.58e-08
CNOT3	4.08	1.58e-08
SCRT2	3.67	1.65e-08
UBTF	5.35	1.77e-08
KLF17	5.08	1.8e-08
LEO1	5.08	1.82e-08
LMTK3	10.67	1.88e-08
TARDBP	4.04	1.89e-08
SP4	4.63	1.97e-08
SMARCE1	3.91	2.02e-08
NFYB	6.33	2.22e-08
MBD3	3.77	2.44e-08
PDX1	5.19	2.78e-08
ZNF554	7.27	2.96e-08
TAT	35.74	3.04e-08
PSIP1	5.16	3.1e-08
CHRM2	3.46	3.56e-08
HOXA4	5.7	3.72e-08
EHMT2	4.28	3.98e-08
ASXL1	6.52	4.07e-08
E2F3	6.02	4.38e-08
SUZ12	4.8	4.42e-08
ZNF76	5.3	4.61e-08
ZNF610	5.99	4.7e-08
SRC	5.59	4.87e-08
TTF1	3.55	5.05e-08
NR1H2	4.35	5.51e-08
WRNIP1	6.87	5.8e-08
JUNB	4.04	5.98e-08
NFATC1	5.51	6.07e-08
SSU72	5.5	6.25e-08
ZNF83	5.17	6.52e-08
TBL1XR1	4.15	6.73e-08
ELK3	10.85	6.93e-08
C11orf30	3.85	7.97e-08
ATF4	4.84	8.18e-08
TET2	3.03	9.09e-08
LMNA	4.21	9.54e-08
TRAF7	3.17	9.64e-08
E2F5	4.53	1.1e-07
ZFP2	4.02	1.14e-07
SREBF1	6.48	1.18e-07
ZFP37	4.31	1.25e-07
ZNF770	7.02	1.31e-07
ADNP	5.9	1.43e-07
ZNF394	3.94	1.6e-07
ZNF239	11.67	1.67e-07
FOXO3	4.22	1.7e-07
DPF2	3.27	1.7e-07
EGR2	3.91	1.83e-07
ZNF18	5.07	1.9e-07
ZXDB	4.34	2.07e-07
ZNF639	4.32	2.25e-07
ZFX	5.67	2.31e-07
DAXX	3.61	2.56e-07
PRAME	6.59	2.64e-07
TTF2	7.27	2.67e-07
KLF11	3.92	3.08e-07
ZSCAN20	7.16	3.11e-07
TET3	7.16	3.14e-07
TP73	4.62	3.22e-07
PATZ1	4.19	3.56e-07
ETV4	5.12	3.65e-07
ARNT	3.63	3.77e-07
CLOCK	6.95	4.23e-07
DDX20	5.06	4.25e-07
DEK	4.76	4.41e-07
PKNOX1	3.59	4.52e-07
TRIM25	3.82	4.71e-07
ZNF263	3.57	5.14e-07
PBX2	3.92	5.35e-07
UHRF2	6.16	5.57e-07
ARRB1	4.67	5.7e-07
POLR2M	5.65	5.82e-07
ZC3H8	4.66	5.93e-07
RAD51	4.65	6.04e-07
POLR2B	5.63	6.06e-07
FOXJ2	6.07	6.5e-07
ZNF692	3.87	6.54e-07
RBBP5	3.74	6.64e-07
ZNF146	7.4	6.83e-07
GTF2I	5.57	6.86e-07
FOXH1	4.35	7.4e-07
AGO1	7.33	7.48e-07
TGIF2	4.56	7.75e-07
GATA6	3.69	8.1e-07
SP3	4.8	8.31e-07
CDK2	5.93	8.41e-07
TBL1X	5.79	1.09e-06
SAP30	5.35	1.09e-06
DACOR1	11.09	1.15e-06
CHD1	3.39	1.22e-06
KDM5C	6.22	1.31e-06
ZEB1	3.47	1.31e-06
BACH1	4.17	1.32e-06
STAT5B	3.83	1.34e-06
PHF2	6.88	1.36e-06
ZNF501	3.98	1.37e-06
MAFG	4.16	1.4e-06
INSM2	5.23	1.42e-06
ZSCAN29	5.22	1.43e-06
ZNF644	5.19	1.55e-06
INTS3	3.66	1.56e-06
DCP1A	8.87	1.57e-06
ZNF335	3.33	1.61e-06
ZNF280D	7.63	1.62e-06
FEZF1	4.1	1.67e-06
HBP1	5.14	1.7e-06
NBN	3.59	2.1e-06
RBL1	3.46	2.17e-06
LDB1	6.54	2.18e-06
HNF1A	5.84	2.47e-06
JARID2	4.15	2.71e-06
KLF8	4.12	2.89e-06
AFF4	3.77	2.94e-06
DUX4	3.77	2.98e-06
GTF2F1	3.93	3.01e-06
L3MBTL4	7.09	3.05e-06
MYCN	6.31	3.07e-06
BCL3	3.29	3.12e-06
ESRRA	3.38	3.19e-06
XRN2	4.85	3.33e-06
SMARCA5	4.29	3.38e-06
MNT	5.2	3.43e-06
CTNNB1	4.28	3.43e-06
SETD1A	4.07	3.47e-06
NR2C2	3.56	3.96e-06
HDAC4	7.86	4.1e-06
L3MBTL2	3.05	4.46e-06
KMT2B	6.05	4.54e-06
RPE	5.49	4.56e-06
H2AFZ	2.69	4.7e-06
ORC2	6	4.88e-06
CTBP1	3.78	5.01e-06
ZMIZ1	5	5.18e-06
PHF8	3.77	5.2e-06
CHD7	5.42	5.25e-06
ZKSCAN5	14.49	5.48e-06
LEF1	3.48	5.49e-06
PBX1	5.92	5.54e-06
BANF1	4.11	5.58e-06
PRDM6	5.9	5.69e-06
TCF7	4.1	5.79e-06
WT1	4.09	5.93e-06
ZBTB8A	3.89	6.06e-06
ZNF750	4.31	6.13e-06
PRDM10	3.14	6.47e-06
PRDM2	5.81	6.57e-06
HIC1	3.86	6.66e-06
PITX3	3.52	7.58e-06
DNMT3A	5.2	7.85e-06
ZNF24	3.18	7.93e-06
SOX13	5.69	8.02e-06
EZH1	7.22	8.07e-06
TAF3	5.67	8.22e-06
ZNF207	13.44	8.37e-06
CTBP2	4.76	8.59e-06
TRRAP	8.39	8.66e-06
ZSCAN16	4.44	8.79e-06
ZMYM3	4.17	9.09e-06
SMARCC1	3.45	9.79e-06
PRKDC	5.08	9.8e-06
DRAP1	7.03	9.86e-06
SP2	3.9	1.06e-05
MAF	4.35	1.09e-05
HOXC9	3.71	1.1e-05
ZNF101	4.57	1.31e-05
ETV6	4.92	1.34e-05
BIRA	6.75	1.36e-05
HIRA	4.54	1.39e-05
OSR2	3.81	1.42e-05
CHAMP1	3.49	1.42e-05
ZNF318	4.23	1.49e-05
GFI1B	6.66	1.51e-05
ERCC3	4.83	1.6e-05
FOXO1	3.1	1.71e-05
GTF2B	5.18	1.87e-05
OGT	4.75	1.89e-05
ZNF589	4.38	2.01e-05
MEF2D	5.13	2.05e-05
ZNF324	4.36	2.13e-05
CHD5	5.64	2.14e-05
ZFP64	4.08	2.17e-05
ZNF580	4.34	2.21e-05
ZNF35	4.3	2.42e-05
BRD7	11.05	2.49e-05
ZNF341	3.8	2.59e-05
NFKB2	4.99	2.6e-05
STAT2	4.96	2.74e-05
ZNF467	4.96	2.77e-05
ZNF92	7.07	2.87e-05
KMT2D	3.75	2.95e-05
ZNF175	4.53	2.96e-05
TAF7	3.57	2.96e-05
ZNF414	3.56	3.09e-05
TERF2	10.56	3.19e-05
NPAT	5.97	3.49e-05
RB1	3.89	3.55e-05
CBX2	14.19	3.66e-05
LHX2	4.8	3.66e-05
CBX8	4.4	3.86e-05
E2F4	3.66	3.89e-05
ZBTB6	8.08	3.9e-05
ZNF189	13.99	3.91e-05
TERF1	6.75	3.99e-05
SETX	8.03	4.05e-05
CREM	3.62	4.42e-05
ZNF479	5.76	4.55e-05
KDM4A	3.72	5.68e-05
SETDB1	2.85	5.68e-05
C17orf49	6.4	5.76e-05
ZBED1	4.22	5.78e-05
PRDM11	6.37	5.9e-05
MEF2C	4.49	6.56e-05
PYGO2	7.29	7.35e-05
ID3	3.27	8.21e-05
SCML2	6.06	8.28e-05
ZKSCAN1	3.8	8.34e-05
KAT7	4.78	8.36e-05
NFIA	4.35	8.6e-05
CUX1	3.25	8.61e-05
ETS2	4.32	9.13e-05
MXD3	17.75	9.49e-05
HHEX	6.96	9.77e-05
ERCC2	4.29	9.86e-05
KLF7	4.67	0.0001
NELFA	4.65	0.000103
HAP1	5.86	0.000104
DNMT1	5.15	0.000105
CTRL	5.14	0.000108
RFX2	11.19	0.000111
GABP	4.19	0.000119
CPSF3L	4.19	0.00012
HMGN3	4.18	0.000123
ZNF518A	4.17	0.000125
NCOA1	4.16	0.000128
ZNF197	4.51	0.000133
NCOR2	4.09	0.000146
HCFC1	3.09	0.000149
TFDP1	3.22	0.000154
ZSCAN22	4.87	0.000159
HOXA1	10.23	0.000167
KDM4C	4.37	0.000169
MIER1	3.74	0.00017
NFYA	4.01	0.000174
KDM3A	10.11	0.000176
ZNF597	5.41	0.000177
ZNF800	7.67	0.000181
CSDE1	3.31	0.000188
PRDM14	6.18	0.0002
BAHD1	5.26	0.000214
KAT8	6.09	0.000219
TSHZ1	4.62	0.000233
ZNF202	5.14	0.00025
BRCA1	3.19	0.000269
ZNF121	3.53	0.000283
BRD1	4.46	0.000302
CCNT2	3.75	0.000303
GTF2E2	5.74	0.00031
SMAD5	5.71	0.00032
HDAC8	3.98	0.000349
VEZF1	4.88	0.000351
CENPA	4.84	0.000372
NKRF	3.65	0.000377
ZKSCAN8	4.31	0.00038
ZIM3	6.64	0.000386
THAP1	4.81	0.000388
GREB1	4.29	0.000396
ELK1	3.21	0.0004
ZNF346	3.62	0.000407
ZBTB14	5.45	0.00042
ZNF438	5.42	0.000438
ZNF792	5.41	0.000441
KAT5	5.37	0.000461
KLF6	4.19	0.000467
CCND2	6.34	0.000489
BACH2	5.31	0.000489
KRAB	5.29	0.0005
OVOL3	5.28	0.000509
MBD2	2.66	0.000512
NFE2L2	3.51	0.000513
MCM3	7.92	0.00053
WWTR1	4.56	0.000548
BRPF3	3.48	0.00055
POLR2H	2.96	0.000556
GPS2	7.79	0.000572
HMGN1	6.11	0.000592
DLX1	5.13	0.000598
DNMT3B	3.98	0.000665
GMEB2	5.93	0.000688
E2F8	5	0.000696
HOXA9	7.44	0.000703
REL	3.62	0.000721
TCF21	3.34	0.000773
DPF1	7.27	0.000778
PAX6	4.89	0.000789
ETV5	4.3	0.000793
ZXDC	3.57	0.000795
E2F7	3.13	0.000809
MEN1	4.84	0.000835
GATAD2B	3.09	0.000904
ASCL2	9.65	0.000928
ZSCAN23	4.75	0.000938
ZNF558	4.17	0.000965
SND1	3.76	0.000978
ZNF391	3.76	0.000993
PARP1	4.12	0.00104
DPPA2	6.79	0.00105
ELL2	3.43	0.00106
IL1B	3.41	0.0011
EHF	4.61	0.00111
552-SKD	3.19	0.00111
KLF15	4.04	0.00117
CBX6	5.33	0.00118
ZNF547	6.55	0.00123
HLTF	3.63	0.00125
MAML3	5.18	0.00136
E2F2	5.12	0.00145
ZNF574	4.35	0.00153
ELK4	6.14	0.00162
ZNF28	8.28	0.00163
MBTD1	3.48	0.00165
ZNF284	13.29	0.00167
ZBTB7B	8.16	0.00171
CAMTA2	6.06	0.00172
ZNF584	3.79	0.00174
DIDO1	4.23	0.0018
EBNA3C	3.74	0.00187
RBP2	7.94	0.00188
ZNF423	4.85	0.00189
PMEL	2.32	0.00189
AGO2	11.57	0.00247
ZBTB26	4.57	0.00253
KLF10	4.57	0.00255
SFPQ	7.25	0.00261
KDM5A	5.45	0.0027
ZNF71	3.22	0.00273
IRF9	5.39	0.00284
FOXK1	3.84	0.00303
ZNF664	3.8	0.0032
SIX5	3.37	0.00348
ZNF781	10.17	0.00354
ZNF17	22.74	0.00371
NFAT5	6.55	0.00374
RBBP4	4.22	0.00374
ZNF445	22.35	0.00384
ZNF586	22.2	0.00389
TEAD2	6.42	0.00401
SMARCB1	2.84	0.00404
ARNTL	6.39	0.00408
KLF12	6.36	0.00414
TAFII	6.27	0.00436
EBNA3	6.2	0.00452
ZSCAN5A	3.99	0.00483
ZNF169	19.75	0.00488
PPARD	9.04	0.0049
ZNF8	6.05	0.00493
7SK	4.67	0.00517
ZNF440	19.11	0.0052
ZNF260	18.44	0.00557
RUVBL1	5.79	0.00573
KDM4B	3.4	0.00577
ZNF343	8.46	0.00587
GLI4	4.47	0.00615
TSC22D4	4.47	0.00615
KLF13	3.77	0.00632
ZNF320	8.2	0.00641
MYOG	5.55	0.00666
IRAK1	5.54	0.00668
ETV7	5.54	0.00669
CREB3	3.27	0.00708
CDK6	3.66	0.00725
SIRT6	5.4	0.00728
HES2	3.65	0.00733
NFRKB	2.94	0.00763
ZNF783	7.64	0.00776
MBOAT4	3.6	0.0078
SREBF2	7.45	0.00829
CDC5L	4.12	0.00855
SLC22A2	3.53	0.00862
ZNF75A	7.22	0.00904
HJURP	14.05	0.00937
RBL2	4	0.00966
DROSHA	6.78	0.0107
ZNF675	12.96	0.0109
UBE2I	6.7	0.011
DLX2	6.51	0.0119
ZNF528	3.79	0.0119
HNF1B	6.49	0.012
ZNF468	6.33	0.0128
WDHD1	3.22	0.0129
ZNF623	3.7	0.013
SOX11	6.26	0.0132
ZNF765	11.68	0.0133
DDX21	4.42	0.0143
ZNF280A	6	0.0148
ZNF837	5.9	0.0154
RARG	4.31	0.0155
BCL11B	3.54	0.0155
BCAT1	4.29	0.0157
MCM7	5.83	0.0159
HES1	3.03	0.017
H2AFX	3.45	0.0171
ICE2	10.18	0.0172
ZNF133	10.1	0.0175
HINFP	3.43	0.0175
MRE11A	3	0.0176
ZNF519	4.13	0.0178
YBX1	5.58	0.0179
CCDC101	5.49	0.0186
MECOM	4.05	0.0189
ASH1L	9.5	0.0196
ATF7IP	2.47	0.0196
GATAD1	2.89	0.0206
ZFP57	5.18	0.0216
SON	8.91	0.022
BRDU	5.12	0.0223
GMEB1	8.81	0.0225
TBX5	3.17	0.0235
ZNF585B	4.86	0.0254
ELF2	8.22	0.0256
ZNF793	4.85	0.0256
POLR3A	4.83	0.0258
MLLT3	4.63	0.0288
ZFP41	7.67	0.029
STAT5	3.5	0.0299
ZNF490	7.4	0.031
ZNF674	7.2	0.0326
PTPN11	4.34	0.0339
BARX1	4.31	0.0345
SRSF3	6.97	0.0346
ZNF282	4.26	0.0355
RYBP	6.85	0.0357
FOXG1	6.63	0.0379
IRAK4	4.11	0.0388
ZNF687	2.46	0.0399
ZBTB1	3.9	0.0442
FOXD2	3.86	0.0452
ZNF486	5.94	0.0461
ERCC6	3.03	0.0465
LRWD1	18.82	0.0521
RBCK1	5.52	0.0524
NFYC	3.63	0.0524
ZNF75D	5.51	0.0526
NR5A2	3.48	0.0579
ZNF26	15.79	0.0618
APOBEC3B	2.74	0.0624
EPC1	3.36	0.0632
FANCD2	4.89	0.0647
ATOH1	4.86	0.0655
AEBP2	4.77	0.0678
ZNF217	2.35	0.0678
ZNF680	2.61	0.072
PAX3	4.55	0.0733
HMG20A	3.11	0.0752
SMARCC2	3.06	0.0785
SPIN1	4.29	0.0811
ZNF441	4.18	0.0847
ZNF701	2.14	0.0907
PLRG1	10.28	0.0932
SMN1	10.28	0.0932
ZNF707	3.94	0.0935
ZNF768	10.01	0.0956
BTAF1	9.95	0.0962
YBX3	3.81	0.099
ZNF488	3.75	0.102
ZNF641	3.73	0.103
FOXP3	3.67	0.105
NFE2L1	2.21	0.113
HOXA2	7.49	0.126
LANA	2.44	0.13
ZNF22	2.43	0.13
ZNF264	3.21	0.131
BANP	6.97	0.134
ZNF257	2.4	0.134
ZNF611	6.94	0.135
CD74	3.14	0.135
ZNF292	6.75	0.138
ZNF436	6.57	0.142
ZNF44	6.49	0.144
ZNF317	2.3	0.146
ZNF138	5.93	0.156
ZNF563	5.84	0.158
TDRD3	5.76	0.16
EPAS1	5.74	0.161
ZNF350	5.56	0.166
CBX4	5.55	0.166
ORC1	5.33	0.172
FEV	5.02	0.182
GLYR1	4.99	0.182
CASP8AP2	4.97	0.183
ZNF697	2.59	0.183
CBFA2T2	4.95	0.184
RAC3	4.94	0.184
ZNF618	4.74	0.191
SNAPC1	4.72	0.192
ZNF485	4.72	0.192
COPS2	2.48	0.195
ZNF134	4.55	0.198
ZNF671	4.53	0.199
GRHL1	4.53	0.199
ZNF512	2.42	0.203
ZNF585A	4.24	0.211
H3F3B	4.17	0.214
ZNF592	2.32	0.216
ZNF182	4.07	0.219
ZNF682	4.04	0.22
NONO	3.93	0.225
SPDEF	2.18	0.236
GTF3C2	2.17	0.238
ZFAT	3.67	0.239
THAP11	3.67	0.239
ZTA	3.62	0.243
ZNF506	3.57	0.245
BARX2	3.48	0.251
HDAC6	2.04	0.259
CRY1	3.31	0.262
ZNF786	3.22	0.268
TIAM1	3.2	0.27
MAFB	2.89	0.294
ZBTB10	2.88	0.294
WHSC1	2.86	0.296
ILK	2.83	0.299
ZNF549	2.82	0.3
DEAF1	2.59	0.322
EBNA2	2.45	0.337
PTTG1	2.43	0.338
SATB1	2.43	0.339
ZNF140	2.39	0.343
ZNF740	1.63	0.349
LIN9	2.24	0.361
POU3F2	1.98	0.399
ZNF778	1.91	0.409
SRCAP	1.9	0.411
SOX10	1.89	0.413
ZNF788	1.83	0.423
NCAPG2	1.74	0.439
ZNF273	1.67	0.452
ZNF695	1.67	0.452
NFIL3	1.62	0.462
SMAD2	1.55	0.477
DMC1	1.49	0.491
CSNK2A1	1.3	0.539
INO80	1.11	0.594
NCAPG	1.02	0.626
PGR	0.8	1
ZNF274	0	1
CENPT	0	1
ZNF780A	0	1
ZBTB16	0	1
CHAT	0	1
ZNF248	0	1
ZNF823	0	1
ZNF808	0	1
ARNT2	0	1
CENPC	0	1
ZNF84	0	1
CD59	0	1
ZNF93	0	1
ZNF16	0	1
TLE3	0	1
USP49	0	1
BATF3	0	1
ZNF100	0	1
ZNF136	0	1
ZSCAN2	0	1
ZNF573	0	1
ZNF304	0	1
CREB3L4	0	1
ZNF649	0	1
IRF3	0	1
KDM1B	0	1
KLF3	0	1
ZNF48	0	1
ZNF605	0	1
GTF2A2	0	1
GCSAM	0	1
NME2	0	1
ZNF430	0	1
ZNF429	0	1
ZNF425	0	1
OLFM2	0	1
ZNF281	0	1
PCGF1	0	1
PHF6	0	1
POU2F1	0	1
ZNF354C	0	1
PPARGC1A	0	1
PRDM12	0	1
PTRF	0	1
ZNF331	0	1
SF1	0	1
SIX4	0	1
ZNF287	0	1
ZFP28	0	1

## Sheet: CRC BART
	odds ratio	pvalue
TERC	6.41	0
POLR3D	5.58	0
RAD21	4.99	0
NR3C1	4.96	0
ESR1	4.88	2.3e-308
SMARCA4	4.76	1.71e-300
MAX	4.74	3.83e-300
SP1	5.13	2e-299
MYC	4.7	1.32e-298
CTCF	4.66	5.21e-295
SPI1	4.49	1.71e-273
CEBPB	4.37	1.13e-269
SNAI2	5.2	1.91e-260
TEAD4	4.53	2.19e-258
USF1	5.46	2.9e-255
REST	4.7	1.71e-254
KDM5B	4.72	1.72e-250
YY1	4.55	4.35e-249
JUND	4.35	1.8e-248
EP300	4.07	1.7e-245
SMC1A	4.9	2.07e-245
ERG	4.64	9.57e-245
TRIM28	4.3	9.9e-244
POLR2A	4.25	5.69e-236
CDCA2	5.68	3e-226
GABPA	4.75	3.3e-222
FOXA1	3.77	1.28e-221
TCF12	4.11	8.14e-220
FAIRE	4.45	1.68e-218
PR	4.12	1.06e-217
CBX3	5.02	1.15e-214
EGR3	6.37	4.26e-214
TFAP2C	4.74	4.72e-214
AR	3.7	2.47e-211
ZNF143	4.88	1.25e-209
BRD4	3.62	1.22e-208
HIF1A	4.65	7.05e-208
NR2F2	4.22	5.6e-205
SRF	4.84	2.14e-204
FOS	4.14	9.68e-199
ZBTB48	4.49	1.6e-198
SMC3	4.62	4.64e-197
MED1	3.72	8.63e-196
FOSL2	4.51	3.34e-194
RELA	3.87	8.42e-193
EZH2	4.12	6.2e-192
TFAP2A	4.48	1.39e-191
JUN	4.16	1.06e-188
HDAC2	3.9	5.67e-188
SOX2	4.04	1.9e-185
RCOR1	4.31	3.01e-185
MAZ	4.38	1.19e-182
TP53	4.53	1.73e-182
WDR5	4.63	3.72e-182
RUNX1	3.86	8.77e-182
FOXP1	4.41	3.56e-181
H2AZ	3.32	1.38e-180
KMT2A	3.99	1.73e-179
FLI1	4.16	3.09e-179
SUMO2	3.88	3.1e-179
STAT4	6.03	4.08e-179
CREB1	4.06	1.4e-178
EGR1	5.08	3.56e-178
TAL1	3.99	3.29e-177
SMAD3	4.56	3.94e-177
ASCL1	6.09	1.81e-176
BHLHE40	4.59	2.3e-175
FOXA2	3.85	2.44e-174
SIN3A	4.11	1.19e-173
ATF3	4.14	1.92e-173
OTX2	3.77	1.96e-172
FOSL1	4.52	4.18e-171
ELF1	4.2	2.41e-169
IRF5	6.19	7.32e-169
GATA2	3.62	1.51e-168
EGR2	5.94	2e-167
SPIB	4.95	1.86e-165
NFIC	3.81	2.38e-165
KLF1	4.7	2.73e-165
USF2	5.1	3.8e-165
TCF7L1	4.25	5.94e-165
TET2	4.3	8.97e-165
GRHL3	5.3	2.01e-163
MITF	5.11	1.9e-159
E2F6	4.99	3.69e-159
HDAC1	3.67	3.75e-158
NKX2-1	4.37	5e-158
MXI1	4.36	5.56e-158
HSF1	4.82	1.62e-157
GATA3	3.15	4.32e-157
IRF4	4.25	6.68e-157
MAFK	4.25	1.02e-156
STAT3	3.93	2.89e-155
RXRA	4.6	3.84e-155
CEBPA	3.94	4e-154
STAG1	3.48	7.4e-153
KDM1A	3.77	3.37e-152
GATA4	4.09	3.99e-152
STAT1	3.71	3.85e-149
REPIN1	4.54	3.96e-149
TCF7L2	4	7.4e-149
MYOD1	5.72	3.92e-148
HNF4A	4.8	2.47e-147
PPARG	3.94	2.71e-145
GRHL2	4.36	5.37e-145
TCF4	4.44	5.5e-145
ZBTB33	4.42	9.78e-145
GATA1	3.59	1.46e-143
SOX4	4.19	6.8e-143
BMI1	4.33	1.01e-142
LMNB1	3.81	2.02e-142
NR2F1	3.89	1.23e-141
RNF2	3.95	1.65e-140
IKZF2	4.85	2.54e-140
FOXM1	3.84	1.42e-139
YAP1	3.75	2.32e-139
CBX1	5	1.14e-138
HEXIM1	4.99	2.18e-138
NFE2	4.21	2.35e-138
NIPBL	3.79	5.45e-138
NEUROG2	4.59	2.43e-137
CDK8	3.7	7.58e-137
ZBTB17	4.07	4.14e-136
POU5F1	3.97	3.24e-135
EOMES	4.36	2.12e-134
ICE1	6.01	1.73e-132
NRF1	5.55	5.5e-132
GLIS1	4.52	8.34e-132
POLR2AphosphoS5	4.55	1.43e-131
TFAP4	3.95	7.29e-131
CBFB	4.48	3.58e-130
CNOT3	4.9	8.41e-130
CHD2	4.5	8.43e-130
SMAD4	5.19	9.21e-130
CREBBP	4.13	7.18e-129
KLF4	4.21	9.13e-128
NANOG	4.08	7.46e-127
SMAD1	4.17	5.65e-125
ATF2	3.71	6.13e-125
TAF1	3.86	6.94e-125
TRIM24	4.08	5.01e-124
ZBTB2	5.33	6.1e-124
LARP7	4.77	2.06e-123
E2F1	3.87	6.17e-123
VDR	4.23	6.76e-123
CDK9	3.61	4.6e-121
ZBTB7A	4.34	4.51e-120
TBP	3.98	1.02e-119
RFX5	4.29	1.59e-119
ETS1	3.94	3.28e-119
RUNX2	4.47	1.26e-117
TP63	4.31	1.86e-117
ZMYND8	4.17	7.71e-116
ARNT	4.51	4.19e-114
ZNF263	4.47	8.42e-114
MECP2	5.35	9.07e-114
CTCFL	4.91	9.77e-114
PBX3	3.33	3.16e-113
EED	3.75	9.64e-113
PROX1	5.13	1.02e-112
NEUROD1	3.75	1.3e-112
EBF1	3.8	1.4e-112
TEAD1	4.19	4.17e-112
AFF1	4.04	1.07e-110
598-SKD	4.97	3.24e-110
DAXX	4.33	4.79e-110
EBF3	4.5	6.82e-110
HOTAIR	5.29	7.29e-110
SSRP1	4.34	5.64e-109
NR1H3	4.06	1.38e-108
HOXB13	3.27	8.83e-108
JMJD1C	4.01	3.59e-107
SCRT2	3.92	3.85e-105
MYH11	3.72	3.86e-105
BCL6	3.54	4.44e-104
ZNF384	4.2	7.98e-103
SUMO1	4.85	2.16e-101
SIX2	4.01	4.75e-101
MYB	3.31	9.68e-101
ATF1	3.74	1.62e-99
RELB	4.61	4.14e-99
IRF1	3.32	5.62e-99
SP4	4.81	2.79e-98
TOP1	3.5	9.82e-98
NELFE	4.36	1.3e-97
KLF9	4.23	2.28e-97
IKZF1	2.88	9.04e-97
PML	3.62	2.44e-95
PIAS1	3.61	2.59e-95
RBPJ	3.92	4.49e-95
NR1H2	4.6	7.45e-95
EMX1	5	3.23e-94
RBL1	4.16	4.39e-94
KLF5	3.52	1.26e-93
NR2F6	4.05	1.5e-93
EGLN2	4.7	8.37e-93
BCOR	3.48	9.1e-93
KLF11	4.34	1.17e-92
CHRM2	3.54	2.91e-92
ZEB1	4.02	3.15e-91
BRD2	3.72	1.19e-90
BRD3	4.31	1.73e-90
MBD2	4.11	3.91e-90
MAFF	4.2	5.1e-90
TRIM25	4.23	5.71e-90
ZNF600	3.7	1.06e-88
POU2F2	3.67	1.18e-88
HCFC1	4.45	2.21e-88
CDX2	4.18	5.03e-88
MBD1	5.14	2.03e-87
FOXP2	4.81	2.38e-87
ZMYM3	5.21	3.08e-87
KDM6B	4.02	3.16e-87
RUNX3	3.17	4.11e-87
MEF2A	3.91	1.25e-86
AFF4	4.42	1.61e-86
PAX5	3.69	2.02e-86
NR4A1	3.52	1.08e-85
ZEB2	3.4	6.55e-85
HNF4G	4.39	6.84e-85
BCL3	3.79	8.59e-85
SMARCC1	4.2	1.68e-84
KDM2B	3.18	3.54e-84
TTF1	3.49	5.9e-83
BACH1	4.61	4.11e-82
ZNF382	3.3	4.44e-82
ING5	3.74	5.07e-82
FOXO3	4.28	1.92e-81
552-SKD	5.17	3.38e-81
SRC	5.38	7.05e-81
ZFP2	3.99	2.94e-80
HLF	3.91	4.45e-80
MYNN	4.72	4.5e-80
E2F4	4.68	6.26e-80
MYBL2	3.93	6.32e-80
SUPT5H	3.49	7.71e-79
ZNF766	4.05	9.5e-79
GTF2I	5.86	1.21e-78
GATA6	3.88	4.16e-78
XBP1	4.07	7.45e-78
TBL1XR1	3.98	9.73e-78
RUNX1T1	4.48	1.21e-77
GATAD2B	4.76	1.42e-77
BCLAF1	3.66	4.77e-77
ARID3A	3.88	1.14e-76
STAT5A	3.56	1.42e-76
CDK2	6.19	2.04e-76
FOXO1	3.66	2.07e-76
ELK1	4.61	5.79e-76
ZNF639	4.26	1.24e-75
L3MBTL2	3.36	2.91e-75
BATF	3.74	3.46e-75
GTF2F1	4.24	1.02e-73
PKNOX1	3.59	1.51e-73
RARA	4.08	4.08e-73
NFIA	5.64	1.16e-72
RFX1	3.75	1.21e-72
H2AFZ	2.89	1.5e-72
ELF3	3.15	2.2e-72
NOTCH1	3.42	5.04e-72
CTBP1	4.12	8.26e-72
DPF2	3.13	1.19e-71
AHR	4.45	1.61e-71
PSMA7	3.32	8.58e-71
STAT5B	3.91	1.8e-70
ZNF24	3.48	2.4e-70
TCF21	4.86	7.37e-70
CEBPD	4.04	8.22e-70
MBD4	4.2	1.35e-69
PRDM1	3.54	1.59e-69
ETV1	4.04	2.21e-69
PRDM10	3.37	4.83e-69
ZKSCAN1	4.72	5.02e-69
ELL2	5.12	7.79e-69
MTA2	2.77	8.22e-69
FOXH1	4.27	1.12e-68
NKX3-1	3.79	1.23e-68
ZNF394	3.65	5.62e-68
IL1B	5.07	8.83e-68
SP7	3.48	9.22e-68
NR2C2	3.72	1.27e-67
KMT2D	4.33	1.62e-67
ZNF692	3.75	2.62e-67
TAF7	4.11	2.82e-67
BRCA1	4.16	3.14e-67
SOX9	4.84	4.58e-67
ESRRA	3.47	1.22e-66
TGIF2	4.41	1.34e-66
E2F5	4.06	2.13e-66
MLLT1	2.83	2.49e-66
NCOR1	4.5	4.69e-66
KMT2B	6.3	5.96e-66
ETV4	4.76	6.31e-66
RB1	4.49	7.12e-66
PATZ1	3.92	7.48e-66
SMAD2-SMAD3	4.69	1.39e-65
KLF17	4.22	4.15e-65
PDX1	4.37	4.39e-65
ATF4	4.23	4.63e-65
C11orf30	3.4	1.07e-64
NFKB1	4.26	1.29e-64
ZNF366	3.44	1.73e-64
NFYA	5.07	1.79e-64
ARRB1	4.35	9.96e-64
KLF16	4.75	1.38e-63
ZNF770	6.06	1.63e-63
ZNF121	4.54	2.16e-63
BCL11A	3.6	7.74e-63
CHD1	3.26	8.9e-63
HDGF	3.36	1.15e-62
HIC1	3.98	1.25e-62
TCF7	4.2	1.6e-62
E2F7	4.26	3.31e-62
NBN	3.5	4.17e-62
ZBTB11	3.8	2.53e-61
CTNNB1	4.22	4.18e-61
NFE2L2	4.63	4.46e-61
JUNB	3.43	6.28e-61
CHD8	2.82	2.8e-60
TARDBP	3.29	3.85e-60
ZNF2	3.7	9.1e-60
GABP	4.95	1.86e-59
ZXDC	4.81	2.03e-59
RING1	3.48	2.27e-59
MTA3	3.14	2.97e-59
ZBTB40	2.67	9.12e-59
TP73	4.05	1.02e-58
FOXK2	3.65	1.28e-58
GLIS2	4.05	1.39e-58
PAF1	3.55	1.43e-58
LEF1	3.44	1.49e-58
KLF15	5.68	1.68e-58
MED12	3.8	2.16e-58
ZNF687	5.15	2.45e-58
PBX2	3.52	3.01e-58
CDK7	3.41	3.04e-58
ZNF83	4.22	4.44e-58
MNT	4.97	4.59e-58
NFYB	4.9	7.7e-58
ZNF18	4.29	1.13e-57
JMJD6	3.67	1.79e-57
ZNF467	5.27	1.82e-57
MAFG	3.83	2.02e-57
SCRT1	4.7	2.39e-57
SP2	3.93	2.99e-57
RAD51	4.11	3.64e-57
ZNF479	6.27	1.16e-56
BANF1	4	1.34e-56
ZNF554	5.55	1.38e-56
UBTF	4.11	2.14e-56
OSR2	3.85	3.51e-56
MYF5	4.41	8.85e-56
CREM	3.87	9.68e-56
SETDB1	3.06	1.93e-55
LMO2	4.09	2.55e-55
INTS3	3.34	4.15e-55
BPTF	5.27	4.62e-55
SMARCA5	4.01	4.88e-55
SMARCB1	4.16	9.62e-55
HIRA	4.52	1.66e-54
ZFP69B	4.07	3.28e-54
ZNF76	4.11	5.41e-54
H3F3A	3.12	8.45e-54
TRAF7	2.64	9.6e-54
ESCO2	4.14	1.13e-53
KLF8	3.79	1.38e-53
CHD5	5.67	1.52e-53
POLR2M	4.76	1.98e-53
HEY1	3.64	2.16e-53
MBD3	2.95	3.7e-53
CHAMP1	3.44	4.96e-53
SETD1A	3.73	1.17e-52
ZBTB8A	3.67	1.18e-52
CBX5	3.55	2.07e-52
ZC3H8	3.94	2.08e-52
WT1	3.81	1.52e-51
ZNF324	4.3	1.74e-51
SP140	3.66	1.88e-51
ZNF35	4.28	2.1e-51
ZNF341	3.79	2.96e-51
MEF2B	3.12	3.06e-51
ZNF701	4.9	4.73e-51
RBBP5	3.18	1.06e-50
ZSCAN16	4.15	1.57e-50
ZFP37	3.4	2.77e-50
LMO1	4.03	3.59e-50
PITX3	3.28	5.23e-50
ZNF175	4.48	7.78e-50
RXRG	4.96	2.77e-49
DDX5	3.89	3.38e-49
HMGN3	4.47	3.49e-49
PRKDC	4.68	4.35e-49
ING2	3.45	5.35e-49
ZNF750	3.9	7.02e-49
PCGF2	4.03	7.38e-49
CEBPG	3.46	9.33e-49
CUX1	3.38	1.37e-48
BRD9	5.24	1.84e-48
TBX21	2.89	2.18e-48
OGT	4.5	2.43e-48
TFDP1	3.44	3.64e-48
EHMT2	3.2	5.11e-48
CSDE1	3.58	6.07e-48
DEK	3.8	7.66e-48
PSIP1	3.72	1.26e-47
ZNF580	4.13	1.54e-47
ZNF654	4.07	2.62e-47
ZNF644	4.28	5.32e-47
SSU72	4	6.23e-47
ZNF335	2.85	9.04e-47
CCNT2	4.15	9.18e-47
HBP1	4.25	1.41e-46
WDHD1	5.18	1.64e-46
ZNF414	3.42	2.63e-46
JARID2	3.53	5.25e-46
ZNF92	6.6	6.14e-46
ZNF589	4.06	1.42e-45
MIER1	3.93	1.77e-45
PHF8	3.3	1.84e-45
ZNF362	3.23	2.34e-45
ZMIZ1	4.29	2.35e-45
HOXA4	3.99	2.75e-45
SUZ12	3.43	1.61e-44
FEZF1	3.37	2.51e-44
DUX4	3.19	2.83e-44
DNMT3B	4.55	5.02e-44
ZNF197	4.57	6.42e-44
NFATC3	3.49	2.71e-43
ZNF501	3.21	3.95e-43
TET3	5.13	5.61e-43
HOXC9	3.24	3.68e-42
SMARCE1	2.75	3.8e-42
GREB1	4.59	5.61e-42
DDX20	3.76	5.79e-42
ZSCAN22	4.87	7.47e-42
ADNP	4.11	1.94e-41
WWTR1	4.97	2.16e-41
ZNF257	5.96	4.72e-41
TRIM22	3.09	4.91e-41
SLC22A2	5	2.89e-40
FUS	3.94	3.36e-40
KDM5C	4.62	4.19e-40
MRE11A	4.62	4.32e-40
ZNF574	5.11	4.75e-40
ZBTB42	5.06	5.12e-40
KDM4B	4.54	5.43e-40
PBX1	4.7	7.96e-40
ZXDB	3.13	8.43e-40
PRDM2	4.66	9.23e-40
REL	3.93	1.34e-39
SOX13	4.56	6.79e-39
SP3	3.54	8.75e-39
HLTF	4.08	1.1e-38
ZNF534	4.59	1.34e-38
FOXJ2	4.28	3.3e-38
FOXK1	4.69	4.13e-38
ASXL1	4.1	7.87e-38
TSHZ1	4.5	9.18e-38
CTRL	4.68	3.94e-37
PAX6	5.19	4.26e-37
H2AFX	5.19	4.32e-37
UHRF2	4.24	6.92e-37
MBTD1	3.91	6.95e-37
ASH2L	3.61	2.71e-36
ID3	2.97	2.81e-36
ZNF217	4.24	7.8e-36
PRAME	4.3	9.96e-36
ZNF610	3.72	1.97e-35
CTBP2	3.71	2.66e-35
INSM2	3.72	2.79e-35
ZNF518A	3.76	6.09e-35
SIX5	3.95	1.04e-34
LEO1	3.12	1.26e-34
SIX1	4.4	1.4e-34
ZNF346	3.52	1.59e-34
ZKSCAN8	4.16	1.63e-34
HNF1A	4.15	1.95e-34
ZFX	3.69	2.03e-34
RAG2	3.06	4.97e-34
SAP30	3.69	5.6e-34
TBL1X	3.95	7.46e-34
NFKB2	4	7.7e-34
ZNF584	4.1	1.17e-33
CDK6	4.61	2.02e-33
E2F3	3.62	2.19e-33
NFATC1	3.4	2.21e-33
NKRF	3.48	2.68e-33
POLR2B	3.73	3.59e-33
KLF10	5.08	6.42e-33
CPSF3L	3.66	7.48e-33
AGO1	4.68	1.21e-32
PMEL	2.43	2.13e-32
LYL1	4.01	2.22e-32
APOBEC3B	4.8	3.9e-32
KDM6A	3.32	6.08e-32
ZNF101	3.47	6.15e-32
ZNF146	4.62	1.31e-31
HMBOX1	2.99	1.33e-31
ZNF71	3.51	1.81e-31
LMNA	2.7	2.61e-31
STAT2	3.83	3.04e-31
SND1	3.73	3.19e-31
GATAD1	3.99	4.48e-31
MEF2C	3.66	4.89e-31
NR5A2	6.13	7.35e-31
KAT5	4.91	7.4e-31
ERCC3	3.62	8.13e-31
CLOCK	4.22	1.58e-30
ERCC2	3.56	2.22e-30
HDAC8	3.59	2.7e-30
GLI2	3.33	3.34e-30
ZNF680	4.51	6.3e-30
TSC22D4	5.23	7.48e-30
MAF	3.2	8.23e-30
PRDM11	4.89	1.03e-29
ZFP64	3.11	1.13e-29
BAHD1	4.45	1.66e-29
NCOA1	3.45	3.01e-29
SETX	5.83	3.16e-29
NCOR2	3.43	3.31e-29
KRAB	4.73	4.35e-29
CDC5L	4.95	4.6e-29
HES1	3.93	5.11e-29
ZNF792	4.77	5.16e-29
XRN2	3.29	5.96e-29
ZBED1	3.33	6.23e-29
TAF3	3.9	9.34e-29
ZNF318	3.11	1.25e-28
CBX8	3.36	1.88e-28
EHF	4.37	2.19e-28
ZNF391	3.56	2.53e-28
BCL11B	4.54	2.98e-28
CENPA	4.18	3.06e-28
RPE	3.65	4.27e-28
MYCN	4.03	6.2e-28
DNMT3A	3.56	6.81e-28
KDM4A	2.93	9.01e-28
DRAP1	4.65	1.18e-27
CHD7	3.6	1.29e-27
PGR	4.79	1.66e-27
SREBF1	3.61	1.77e-27
STAT5	4.95	2.49e-27
WRNIP1	3.69	3.6e-27
KLF6	3.64	5.68e-27
TTF2	4	2.37e-26
KLF7	3.59	2.56e-26
HES2	4.07	2.62e-26
ERCC6	4.52	2.74e-26
HAP1	4.38	4.35e-26
ZNF740	4.66	8.33e-26
ZSCAN5A	4.19	1.02e-25
HOXA6	3.57	1.14e-25
GLI4	4.81	1.24e-25
LANA	4.61	1.49e-25
HINFP	4.23	1.97e-25
TBX5	4.06	3.56e-25
MEF2D	3.49	5.61e-25
ETV6	3.3	5.83e-25
ZNF22	4.54	7.51e-25
ZSCAN23	4.13	8.38e-25
ZBTB14	4.38	1.36e-24
RARG	5.15	1.87e-24
ZNF438	4.35	2.03e-24
ZNF623	4.27	2.95e-24
VEZF1	3.89	3.05e-24
LDB1	3.81	3.1e-24
ZNF528	4.32	3.13e-24
CREB3	3.47	3.98e-24
DPPA2	5.73	4.77e-24
THAP1	3.83	8.05e-24
KDM4C	3.33	1.04e-23
GTF2B	3.42	1.15e-23
ETV5	3.63	1.3e-23
CDK12	4.3	1.58e-23
NELFA	3.39	1.78e-23
GTF3C2	5.08	2.02e-23
ZNF592	5.24	2.21e-23
KLF12	6.13	2.64e-23
DMC1	5.94	3.75e-23
ZNF423	4.33	4.52e-23
L3MBTL4	4.03	4.67e-23
PRDM14	4.49	4.83e-23
ZSCAN29	3.06	4.94e-23
KLF13	3.85	5.55e-23
ORC2	3.58	5.59e-23
BCAT1	4.96	6.16e-23
ZBTB26	4.2	6.23e-23
HDAC3	3.28	7.1e-23
ZNF280D	4.1	2.2e-22
BRDU	6.21	2.74e-22
ZNF519	4.78	3.75e-22
POLR2H	2.47	3.76e-22
E2F8	3.96	7.64e-22
DIDO1	3.68	8.76e-22
HHEX	4.6	1.13e-21
ZNF8	5.71	1.27e-21
ZTA	9.38	1.42e-21
DPF1	5.57	1.47e-21
LHX2	3.17	1.93e-21
YBX1	6.34	2.39e-21
SCML2	4.01	2.72e-21
CD34	3.27	4.28e-21
BIRA	3.94	6.55e-21
ZNF202	3.69	6.56e-21
MYOG	5.34	8.36e-21
CBX6	4.27	9.92e-21
MEIS1	4.59	1.09e-20
FANCD2	7.25	1.14e-20
BRPF3	2.77	1.15e-20
SMARCC2	4.58	1.21e-20
TRRAP	4.58	1.22e-20
TERF1	4.13	1.33e-20
NFRKB	2.92	2.39e-20
ZFP57	5.89	3.82e-20
GTF2E2	4.05	3.91e-20
7SK	4.3	5.92e-20
ZNF282	5.28	7.41e-20
NPAT	3.64	8.04e-20
ZBTB1	5.03	9.68e-20
BACH2	3.86	1.17e-19
COPS2	4.83	5.04e-19
ZNF558	3.24	5.18e-19
SIRT6	5	6.55e-19
LMTK3	4.17	9.1e-19
PARP1	3.2	1.04e-18
DNMT1	3.32	1.49e-18
ZNF488	5.84	2.17e-18
FOXD2	4.79	3.46e-18
ZNF597	3.53	3.56e-18
BRD1	3.1	4.07e-18
ZNF664	3.23	4.11e-18
ZNF28	6.06	4.26e-18
SPDEF	4.42	4.45e-18
ZSCAN20	3.31	4.64e-18
ZNF317	3.75	5.3e-18
C17orf49	3.74	1.07e-17
NCAPG	4.24	1.2e-17
ZNF585B	5.28	1.22e-17
ZNF547	4.72	1.32e-17
ETS2	2.79	1.41e-17
ARNTL	5.17	2.53e-17
ZBTB6	4.37	2.79e-17
INO80	4.36	3.1e-17
ZNF512	4.52	3.19e-17
TLE3	4.34	3.67e-17
HMGN1	4.11	4.19e-17
DROSHA	6.14	5.34e-17
PCGF1	7.07	5.89e-17
GPS2	5.02	7.13e-17
NFE2L1	3.16	7.24e-17
GFI1B	3.49	1.35e-16
EPC1	4.25	1.65e-16
ATF7IP	2.52	1.88e-16
ZNF800	4.48	1.9e-16
OVOL3	3.49	4.26e-16
MAML3	3.69	6.03e-16
ELK3	4.04	6.07e-16
ZNF506	7.61	8.14e-16
PYGO2	3.94	1.48e-15
ZNF707	5.39	2.61e-15
ZNF837	5.35	3.27e-15
RBL2	3.49	3.27e-15
E2F2	3.58	3.65e-15
CD74	4.78	3.7e-15
HDAC6	3.9	4.29e-15
IRF9	3.96	4.32e-15
SMAD2	4.74	5.09e-15
TLX1	2.79	7.63e-15
EZH1	3.42	7.64e-15
KAT7	2.79	8.83e-15
AEBP2	5.78	1.35e-14
DCP1A	3.69	1.85e-14
CCND2	3.78	4.23e-14
DLX1	3.22	5.4e-14
NFYC	4.03	5.49e-14
SOX11	5.19	9.63e-14
SON	7.74	1.99e-13
ELK4	3.95	1.99e-13
ZNF280A	4.97	3.01e-13
KAT8	3.36	3.4e-13
TIAM1	6.32	5.2e-13
DACOR1	4.07	5.41e-13
HOXA9	4.22	7.03e-13
SRCAP	4.78	8.65e-13
SFPQ	4.62	9.64e-13
CSNK2A1	3.97	1.2e-12
ZNF239	3.88	1.23e-12
GMEB2	3.47	1.53e-12
NCAPG2	4.51	1.93e-12
ZNF140	5.28	1.95e-12
OLFM2	3.98	3.78e-12
AGO2	6.66	3.92e-12
MBOAT4	2.79	4.78e-12
EBNA3C	2.55	5.24e-12
ZNF697	3.84	5.83e-12
ZNF641	4.52	7.76e-12
PHF2	2.78	8.78e-12
ZNF284	6.98	1.41e-11
ZNF273	4.2	2.4e-11
ZNF468	4.6	4.61e-11
ZNF788	4.32	4.9e-11
HDAC4	3.07	4.98e-11
NFIL3	4.07	5.3e-11
EBNA3	3.96	5.78e-11
RBBP4	2.84	5.89e-11
DDX21	3.41	6.17e-11
ZKSCAN5	4.82	7.76e-11
MEN1	2.78	1.26e-10
USP49	7.94	1.71e-10
BANP	8.44	2.48e-10
ZNF429	6.58	3.32e-10
ZNF778	4.22	3.35e-10
BRD7	4.09	3.45e-10
YBX3	4.18	4.02e-10
ZNF75D	5	4.2e-10
KDM3A	4.21	6.87e-10
MAFB	5.04	7.97e-10
GCSAM	3.81	8.95e-10
NFAT5	3.8	9.72e-10
ATOH1	4.59	9.96e-10
ETV7	3.53	1e-09
ZNF793	3.77	1.15e-09
MCM7	4.09	1.26e-09
ZNF207	4.3	1.75e-09
SOX10	4.02	1.85e-09
CRY1	5.28	1.95e-09
MECOM	3.04	2.34e-09
SMAD5	2.78	2.59e-09
ZNF320	4.72	2.73e-09
ZIM3	3.12	3.01e-09
RUVBL1	3.47	4.43e-09
IRF3	3.53	9.26e-09
KLF3	5.29	1.05e-08
ZNF281	5.9	1.31e-08
PAX3	4.13	1.55e-08
ZNF138	6.74	1.69e-08
POLR3A	3.52	1.7e-08
PTTG1	4.25	1.82e-08
SATB1	4.24	1.85e-08
UBE2I	4.03	2.44e-08
SRSF3	4.99	2.64e-08
CAMTA2	3.07	2.79e-08
ZNF436	6.96	3.36e-08
ZNF425	4.61	4.1e-08
ZNF48	7.53	4.21e-08
PTPN11	3.27	4.73e-08
ZNF16	4.52	5.51e-08
PPARD	4.52	5.59e-08
ZNF264	3.4	5.72e-08
ZBTB16	4.11	6.35e-08
DEAF1	4.12	1.2e-07
HOXA1	3.65	1.44e-07
RAC3	5.61	1.72e-07
POU3F2	3.6	1.8e-07
BARX1	3.14	1.82e-07
ZNF84	5.96	2.14e-07
TEAD2	3.24	2.5e-07
HMG20A	2.74	2.51e-07
ZNF441	3.63	2.76e-07
SF1	6.15	4.04e-07
PTRF	4.09	5.12e-07
ZBTB7B	3.5	5.12e-07
ZNF354C	6.56	5.78e-07
ZNF343	4.02	6.73e-07
RBP2	3.41	7.95e-07
ZFP41	4.62	8.49e-07
TAT	5.69	9.48e-07
ZNF695	3.17	1.01e-06
EPAS1	5.64	1.05e-06
SREBF2	3.73	1.08e-06
MCM3	3.06	1.14e-06
EBNA2	3.71	1.16e-06
PRDM6	2.1	1.44e-06
MLLT3	3.02	1.47e-06
RFX2	3.49	1.67e-06
SPIN1	3.4	2.44e-06
CREB3L4	4.71	3.23e-06
ZNF189	3.73	3.58e-06
ZNF93	5.46	3.71e-06
ARNT2	3.89	3.81e-06
ICE2	4.98	4e-06
PPARGC1A	4.58	4.35e-06
ZNF490	4.18	6.03e-06
KDM5A	2.52	6.11e-06
ZBTB10	3.71	6.92e-06
PHF6	5.11	7.15e-06
FOXP3	3.05	7.64e-06
CBX4	5.04	8.22e-06
ZNF485	4.64	8.33e-06
ZNF674	4.06	8.33e-06
PLRG1	6.98	8.87e-06
ZNF44	5.39	1.03e-05
ZNF768	6.8	1.09e-05
ZNF675	5.36	1.1e-05
TAFII	2.81	1.17e-05
IRAK4	2.68	1.17e-05
ZNF134	4.47	1.21e-05
ORC1	4.83	1.23e-05
NONO	4.17	1.25e-05
RBCK1	3.53	1.29e-05
ZNF781	3.8	1.78e-05
TERF2	2.86	2.04e-05
ZNF75A	3.24	2.22e-05
GLYR1	4.53	2.29e-05
ASCL2	3.24	2.3e-05
ZNF563	4.86	2.66e-05
CCDC101	2.88	2.69e-05
ZNF573	6.74	3.52e-05
ZNF182	4	3.82e-05
ZNF292	5.1	4.08e-05
RYBP	3.61	5.81e-05
IRAK1	2.48	7.75e-05
HNF1B	2.92	8.43e-05
ZNF169	5.93	8.55e-05
ZNF786	3.41	0.000105
CASP8AP2	4.13	0.000111
ZNF549	3.2	0.000118
ZNF783	3.05	0.000123
GTF2A2	3.78	0.000124
CHAT	3.54	0.000124
ZNF765	4.38	0.000138
CBX2	3.15	0.000141
ZNF682	3.66	0.000164
ZNF611	4.72	0.000173
ZNF605	6.22	0.000175
ILK	3	0.000373
KDM1B	6.41	0.000431
FEV	3.79	0.000433
BTAF1	5.25	0.000478
DLX2	2.6	0.000685
HJURP	4.22	0.000801
WHSC1	2.81	0.00105
LIN9	2.54	0.00123
THAP11	3.05	0.00131
ZFAT	3.05	0.00132
NME2	4.63	0.00222
ZNF430	7.03	0.00282
GMEB1	2.98	0.00407
MXD3	2.96	0.00418
ZNF823	3.87	0.00526
H3F3B	2.83	0.00552
ZSCAN2	2.83	0.00561
ZNF133	3.03	0.00589
ZNF17	4.26	0.00717
ZNF445	4.19	0.00769
ZNF586	4.16	0.00789
SNAPC1	2.85	0.00835
FOXG1	2.49	0.00851
ZNF274	2.36	0.0087
HOXA2	3.39	0.00976
ZNF671	2.73	0.0105
ZNF350	2.93	0.0114
POU2F1	4.49	0.0132
ZNF440	3.58	0.0143
ELF2	2.47	0.0183
SIX4	2.88	0.0199
ZNF100	2.58	0.0211
ZNF136	3.73	0.024
ASH1L	2.49	0.0249
TDRD3	2.6	0.0304
ZNF808	2.86	0.0328
ZNF248	3.99	0.0411
ZNF486	2.01	0.0511
ZNF26	3.57	0.0538
ZNF304	3.07	0.0766
PRDM12	2.8	0.0944
ZNF331	2.15	0.166
CBFA2T2	1.87	0.203
GRHL1	1.71	0.226
BATF3	1.58	0.226
ZNF585A	1.6	0.251
BARX2	1.58	0.292
ZNF618	1.43	0.369
SMN1	1.55	0.371
CD59	1.44	0.502
CENPT	1.05	0.613
ZNF649	1.4	0.658
ZNF260	1.38	0.66
ZNF780A	0.77	1
ZNF287	0	1
ZFP28	0	1
LRWD1	0	1
CENPC	0	1
